# Supplementary material for: Meta-Analysis of Parkinson's Disease Transcriptome Data Using TRAM Software: Whole Substantia Nigra Tissue and Single Dopamine Neuron Differential Gene Expression
Source: PLoS One. 2016 Sep 9;11(9):e0161567. doi: 10.1371/journal.pone.0161567 (PMC5017670; doi:10.1371/journal.pone.0161567)
Supplement: S2 Table — Loci are sorted in descending order. Gene Name: official gene symbol as indicated in Gene database; Chr: chromosome; Data points: number of spots associated to an expression value for the locus; Expression A or B: gene expression mean value of all data available for a locus; Expression A/B: gene expression ratio of value A/value B; SD: standard deviation of the expression value indicated as percentage of the mean. N/A: not available in the Gene database (http://www.ncbi.nlm.nih.gov/gene) when the analysis was performed. (XLS) [file pone.0161567.s002.xls]

## Sheet: S2 Table
S2 Table. List of 36,446 TRAM mapped loci for which an expression value A/B was calculated (PD patient SN samples vs control SN samples).
Gene Name	Chr	Data points A	Data points B	Expression A	Expression B	Expression A/B	SD as %of Expression A	SD as %of Expression B
DEFA3	8	28	27	103.366	20.96	4.93161	388.875	87.0779
ELANE	19	99	89	49.1539	16.5145	2.9764	589.103	92.9772
AZGP1	7	164	145	126.992	57.6286	2.20363	109.622	107.538
PCDH20	13	68	51	133.731	62.0081	2.15667	99.4593	95.0784
CTSG	14	99	89	42.5941	19.8326	2.14768	481.919	51.4703
Hs.713638	1	40	24	107.809	50.4578	2.13662	134.149	27.2024
NPTX2	7	93	83	261.401	122.436	2.135	87.9771	101.12
Hs.291993	13	56	41	80.19	37.6937	2.12741	109.255	45.8598
SLC38A2	12	204	171	1015.73	477.452	2.12739	113.878	118.675
BOK	2	139	113	296.407	141.194	2.09928	152.878	134.351
Hs.439682	12	40	24	522.533	253.571	2.0607	39.1373	56.4146
USP54	10	68	51	675.239	327.694	2.06058	81.5024	86.9002
DEFA1	8	147	138	92.032	45.2554	2.03361	378.179	368.959
USP31	16	164	110	316.626	159.361	1.98685	91.9494	83.162
LINC00844	10	56	41	2425.15	1223.6	1.98197	85.8539	97.9823
Hs.290550	7	56	43	448.028	233.335	1.9201	81.58	71.2528
SOWAHA	5	68	53	188.72	98.9245	1.90772	75.1338	47.7044
DANCR	4	40	26	305.397	160.144	1.90702	39.0353	30.9556
LRP2	2	139	113	130.19	68.3242	1.90547	108.133	84.0196
Hs.709790	21	71	62	207.15	109.442	1.89279	116.667	66.9529
DOCK5	8	310	231	171.885	91.1156	1.88645	147.556	147.905
Hs.744879	3	65	56	284.181	150.675	1.88606	111.34	130.576
PDK4	7	155	122	347.202	184.217	1.88474	125.331	129.279
Hs.536218	11	56	41	388.401	206.525	1.88065	79.101	95.7795
SLC5A11	16	68	51	352.097	188.32	1.86967	58.4511	59.7481
MAFK	7	139	113	117.653	63.7264	1.84623	170.497	159.093
Hs.658519	10	16	9	32.5234	17.6288	1.8449	59.1835	30.868
Hs.597557	1	40	24	121.389	65.9804	1.83977	82.4344	43.3877
Hs.130853	6	80	48	63.325	34.549	1.83291	82.1821	37.3668
PTGS2	1	163	133	2685.97	1479.78	1.81512	204.02	250.583
CDK2AP2	11	99	89	106.811	59.5662	1.79315	71.5695	56.5067
FKBP5	6	227	164	298.875	166.902	1.79072	164.81	170.912
C1QA	1	99	89	187.138	105.022	1.78189	106.842	106.354
NEUROD1	2	115	98	29.4873	16.5483	1.78189	343.065	45.6383
Hs.652370	6	40	24	119.127	67.2214	1.77216	58.8626	35.1385
C1QC	1	68	51	895.367	508.279	1.76156	118.618	120.039
PIM3	22	100	85	195.977	111.515	1.75741	114.542	122.295
Hs.742297	7	16	17	94.1839	53.725	1.75307	48.0597	59.1049
ARRDC2	19	112	93	203.451	117.288	1.73463	114.638	100.255
C7orf61	7	68	51	59.2256	34.3392	1.72472	109.599	77.1416
CHORDC1	11	115	108	181.409	105.668	1.71679	112.75	139.037
CHI3L1	1	229	201	455.374	265.48	1.71528	202.068	184.928
AHSA2	2	148	103	131.224	76.5271	1.71474	98.7763	75.3911
ZC3H11A	1	93	91	334.448	195.094	1.71429	100.67	109.638
KLF15	3	133	107	293.572	171.602	1.71077	158.062	154.554
Hs.732899	1	40	24	59.5636	34.9028	1.70656	182.797	100.79
SLCO4A1	20	139	113	139.141	81.6887	1.70331	102.203	92.4182
HVCN1	12	84	70	281.662	165.536	1.70152	104.596	90.097
ZIC1	3	179	141	102.333	60.3453	1.69579	297.284	103.565
LMF1	16	279	230	141.336	83.5728	1.69117	208.853	180.427
CXCL10	4	99	91	72.2851	42.7655	1.69027	357.67	160.615
Hs.595504	2	40	24	390.575	231.702	1.68568	61.4168	55.7784
PNRC1	6	99	91	130.34	77.4695	1.68247	128.896	152.357
HSPA1A	6	164	145	1744.14	1036.74	1.68234	91.6472	186.357
Hs.605035	20	40	24	261.971	155.828	1.68116	41.1224	42.3634
CRTAM	11	99	89	25.6303	15.2508	1.68059	372.207	38.2095
MRAS	3	139	113	544.174	323.836	1.6804	166.143	177.49
Hs.569318	14	16	17	125.17	74.6169	1.67751	45.588	43.1673
PPP4R2	3	189	150	108.083	64.4713	1.67645	106.333	110.235
MT1F	16	158	139	1819.93	1085.98	1.67584	56.8206	68.5593
ITGB8	7	244	193	235.461	140.637	1.67425	219.92	245.269
ZDHHC20	13	108	79	585.737	350.05	1.6733	139.041	150.475
ZNF786	7	28	27	521.202	311.985	1.6706	73.7231	63.5035
Hs.541829	2	16	17	62.4329	37.4261	1.66816	65.1501	62.0299
EPHX1	1	99	89	387.178	232.556	1.66488	92.0732	96.289
Hs.496631	23	56	41	91.3963	54.969	1.66269	131.555	72.5868
ZDHHC11	5	197	171	148.437	89.3092	1.66205	99.2696	102.289
NUPR1	16	115	106	323.014	195.006	1.65643	73.872	81.699
DNAJB1	19	164	145	284.802	172.203	1.65387	111.531	105.81
COLCA1	11	108	75	485.777	295.048	1.64643	143.26	153.025
PILRB	7	211	180	78.3796	47.6908	1.64349	145.276	116.887
Hs.349207	6	56	41	133.967	81.5656	1.64244	54.4184	47.2056
LENG8	19	68	55	87.3039	53.2151	1.64058	78.6511	67.5877
OPHN1	23	99	89	490.865	300.203	1.63511	109.283	93.303
HSPB1	7	99	91	1071.37	655.843	1.63357	102.165	113.964
JMJD6	17	255	221	60.5357	37.072	1.63292	113.354	68.1113
LINC00457	13	16	17	38.5899	23.6685	1.63044	89.9844	49.0881
C1QB	1	99	89	417.41	256.709	1.62601	116.295	97.8906
MT1HL1	1	81	73	2557.25	1572.86	1.62585	71.5023	91.3912
Hs.562162	1	16	17	26.4776	16.2938	1.62501	66.0589	27.4048
IGKC	2	795	674	55.3274	34.0489	1.62494	535.351	146.731
Hs.596385	2	40	24	74.8945	46.1712	1.6221	50.3488	73.335
CDK18	1	141	134	165.421	102.032	1.62126	140.882	130.626
LYZ	12	125	107	51.9461	32.091	1.61871	293.124	63.7042
Hs.743502	7	40	24	143.311	88.6834	1.61599	37.7453	36.6006
Hs.31841	11	40	24	121.628	75.2866	1.61553	49.4457	17.4842
Hs.586747	11	80	48	386.339	239.339	1.61419	101.045	105.433
Hs.541685	2	16	17	59.5593	36.9021	1.61398	64.8518	56.7639
HSD17B7	1	99	97	575.661	356.883	1.61303	149.805	137.886
Hs.732823	2	40	24	77.0951	47.8614	1.6108	96.2582	94.8822
GABRA6	5	99	89	20.3186	12.6141	1.61078	367.674	37.733
HSPA1B	6	99	89	683.101	424.126	1.61061	133.594	143.177
PREX1	20	108	75	464.305	288.291	1.61054	56.1286	65.4686
SOCS6	18	204	169	65.0071	40.4249	1.6081	154.567	138.424
ATP11A	13	371	292	82.3657	51.2224	1.608	252.241	256.58
Hs.601256	9	40	24	95.5565	59.4371	1.60769	39.9526	22.1429
Hs.436163	10	16	17	123.402	76.8652	1.60543	92.5861	40.989
ANLN	7	84	60	1492.85	930.557	1.60426	62.0236	67.556
Hs.544637	6	16	17	683.188	427.799	1.59698	92.5998	85.1178
ZNF14	19	115	106	578.431	362.529	1.59554	202.595	196.622
EDIL3	5	220	178	860.599	539.487	1.59522	202.525	234.69
CERCAM	9	108	77	316.984	198.712	1.59519	119.029	113.476
C10orf128	10	72	56	142.462	89.4656	1.59236	82.6177	77.6345
PTMA	2	300	271	1085.31	682.675	1.58979	95.1668	112.815
Hs.143821	7	40	24	154.435	97.1522	1.58962	40.6722	31.1364
FAM63A	1	149	124	350.243	220.463	1.58867	111.447	103.737
Hs.287168	7	16	9	18.5886	11.7113	1.58723	95.5753	52.0258
CPNE2	16	68	53	239.024	150.852	1.58449	76.2515	90.1558
CRYAB	11	99	89	3757.8	2374.16	1.58279	63.7726	75.7676
Hs.705877	19	111	86	357.69	226.024	1.58253	85.948	91.8761
ABCA2	9	251	222	180.344	114.007	1.58187	121.083	136.508
SGK1	6	115	106	734.518	465.707	1.57721	90.2541	96.1348
PTGS1	9	313	265	653.911	414.671	1.57694	410.757	486.623
APOD	3	99	89	2569.37	1630.15	1.57616	63.7306	70.1802
Hs.405641	4	16	17	27.667	17.6285	1.56944	62.3513	31.7037
NPIPA1	16	174	158	530.959	339.165	1.56549	88.3261	108.663
NEAT1	11	241	171	360.643	230.711	1.56318	157.848	173.86
Hs.715755	11	80	48	248.494	159.213	1.56077	74.4542	83.163
NPIPB3	16	201	182	115.812	74.2541	1.55967	173.894	167.397
Hs.731897	13	40	24	2231.09	1431.16	1.55893	24.9676	35.1629
ERMN	2	112	97	1196.09	770.637	1.55208	118.182	143.752
PABPC3	13	115	106	301.842	195.084	1.54724	113.334	133.482
IL17RB	3	195	154	146.049	94.4956	1.54557	78.7733	68.8379
Hs.669989	2	16	17	73.6902	47.6871	1.54528	47.6789	42.0214
HSPH1	13	164	147	352.39	228.089	1.54497	129.452	99.5042
RAPGEF5	7	168	140	432.078	279.73	1.54462	142.575	151.41
SLC44A1	9	281	206	638.112	413.329	1.54383	118.215	116.145
MT1G	16	164	145	946.341	613.165	1.54337	114.786	120.771
LOC646762	7	48	37	68.3394	44.2979	1.54272	86.9523	73.2675
Hs.736281	11	40	24	1573.24	1019.91	1.54252	88.3195	108.479
FOLR1	11	236	212	138.523	89.8222	1.54219	265.875	222.158
SLC24A2	9	155	132	364.001	236.205	1.54104	149.92	168.336
HNRNPU-AS1	1	40	28	85.6911	55.653	1.53974	80.9046	75.7309
Hs.656858	3	40	24	84.7701	55.0739	1.5392	81.5641	67.2324
PAN2	12	93	83	84.1531	54.6766	1.53911	67.3705	66.982
FTX	23	72	50	243.475	158.308	1.53799	76.5887	91.8648
Hs.560316	14	16	17	97.1008	63.1383	1.53791	38.4996	33.8506
Hs.541965	2	16	17	39.146	25.4784	1.53644	110.553	34.7611
EFHD1	2	93	85	1570.38	1022.1	1.53642	60.1348	79.3595
PNISR	6	343	267	187.279	121.926	1.53601	175.962	106.314
HAPLN2	1	99	89	156.094	101.639	1.53578	65.2199	82.1382
RPL28	19	188	166	1196.58	780.32	1.53344	132.824	149.711
KMT2E	7	208	164	148.594	96.9392	1.53285	96.8676	100.308
MPLKIP	7	84	68	189.689	123.779	1.53247	104.834	97.4812
LIFR	5	219	161	309.511	202.037	1.53195	166.959	169.135
LINC00499	4	16	17	118.105	77.2065	1.52973	65.5581	60.4558
CLMN	14	238	189	94.1556	61.5944	1.52864	93.3202	92.796
NDRG1	8	99	89	1396.88	913.907	1.52847	55.7562	61.5813
KCNJ10	1	139	113	340.169	222.786	1.52689	134.726	155.235
Hs.633361	6	40	24	526.3	344.725	1.52673	100.363	65.6959
IP6K3	6	68	51	142.158	93.2122	1.5251	64.3011	49.1375
STIP1	11	164	147	184.889	121.291	1.52434	114.508	119.168
C21orf91	21	149	124	214.503	140.757	1.52392	157.844	161.834
TMEM176B	7	81	75	104	68.3979	1.52051	86.3056	98.6823
Hs.667101	15	16	17	83.2679	54.7892	1.51979	80.2871	71.1896
Hs.656907	4	40	24	36.3972	23.9493	1.51976	95.6231	62.4049
SRGAP2C	1	40	24	155.652	102.445	1.51937	70.107	30.2522
ALPP	2	164	145	308.72	203.217	1.51917	250.751	229.869
VSIG4	23	99	89	134.471	88.5349	1.51884	114.869	105.696
Hs.655677	13	16	9	84.7628	55.876	1.51698	39.2869	33.4564
Hs.679020	20	16	17	339.616	224.049	1.51581	78.6936	73.1054
Hs.31542	23	16	17	24.7266	16.3205	1.51506	46.5216	28.4614
RSRP1	1	186	164	190.041	125.438	1.51502	106.838	107.773
CDKN1C	11	424	369	212.732	140.488	1.51424	170.467	174.735
TTR	18	99	89	146.858	97.0348	1.51346	459.235	231.568
AKR1C1	10	164	149	221.392	146.626	1.50991	108.426	81.1815
Hs.576509	1	16	17	27.1322	17.9786	1.50913	84.489	46.5992
AIDA	1	77	70	96.1103	63.7491	1.50763	81.2863	101.603
IQGAP1	15	229	201	118.159	78.4195	1.50676	101.727	82.8963
ARL5B-AS1	10	40	24	210.908	140.012	1.50636	41.6763	42.5937
SORT1	1	198	163	653.574	433.95	1.5061	139.744	145.198
Hs.318976	23	16	17	29.2268	19.4186	1.50509	44.673	34.3802
Hs.542993	3	16	17	299.59	199.193	1.50402	77.4623	70.9543
ATG4C	1	84	72	174.652	116.207	1.50294	75.6359	72.8872
LOC649238	23	16	17	24.8449	16.5508	1.50113	73.393	33.6606
SMG1	16	149	134	126.676	84.445	1.5001	116.243	117.818
Hs.143707	1	40	24	53.8627	35.9118	1.49986	192.921	33.983
RPS7	2	204	179	1380.99	920.868	1.49966	97.6694	107.824
KCNE4	2	125	101	27.8487	18.5762	1.49916	60.6276	49.2658
Hs.555274	1	40	24	47.6143	31.7777	1.49836	47.8174	25.644
Hs.736719	17	16	17	37.9033	25.3066	1.49776	43.6156	51.6086
Hs.743773	17	65	56	100.097	66.8531	1.49727	77.4362	88.9372
WASF2	1	139	113	261.209	174.472	1.49714	88.79	84.1707
CXCR4	2	273	243	75.634	50.5324	1.49674	144.293	103.031
MKNK2	19	155	132	310.832	207.79	1.4959	86.9067	101.011
HSP90AA1	14	338	303	2710.94	1813.22	1.4951	88.7418	91.3507
SPP1	4	131	115	2389.24	1599.42	1.49382	89.4496	90.3613
Hs.645315	6	40	24	197.234	132.164	1.49234	51.8868	42.4021
Hs.542592	21	16	17	32.6912	21.9197	1.4914	56.4868	40.471
GKAP1	9	148	99	130.82	87.7179	1.49137	106.761	92.8199
Hs.665807	9	16	17	77.96	52.2795	1.49122	48.9935	55.1479
APLP1	19	115	106	953.254	639.289	1.49112	70.3835	92.6842
UHRF2	9	68	53	135.086	90.6728	1.48982	71.3006	84.0428
ZFP62	5	40	28	136.324	91.5069	1.48977	26.1393	33.3498
MAN2A1	5	195	154	361.197	242.462	1.4897	91.4192	140.29
DNAJC1	10	179	139	216.661	145.588	1.48818	156.379	166.555
ZBED6	1	72	42	42.9579	28.8763	1.48765	123.713	104.739
DCAF6	1	285	215	3764.35	2532.95	1.48615	160.212	183.633
PEAK1	15	121	99	115.988	78.106	1.485	125.388	132.575
PSPH	7	186	168	60.5325	40.7869	1.48412	144.03	117.497
CDK13	7	455	382	102.289	68.9828	1.48282	223.18	203.373
COL16A1	1	99	91	182.887	123.382	1.48228	80.8234	83.6476
KCNMB4	12	179	137	287.208	193.853	1.48158	104.84	97.062
Hs.713347	17	40	24	1508.22	1018.18	1.48129	34.8339	29.4818
MT1M	16	93	83	719.044	485.513	1.481	62.7363	79.3506
SNHG8	4	88	79	178.854	120.803	1.48054	124.003	140.766
PTPRO	12	196	171	1547.73	1047.12	1.47807	172.94	187.552
RPL37	5	179	147	2267.98	1534.67	1.47783	127.251	137.777
Hs.563557	8	16	17	35.3653	23.9308	1.47782	43.8931	46.9847
S100A4	1	115	106	85.7825	58.0801	1.47697	111.186	80.8698
CA2	8	115	106	732.582	496.221	1.47632	87.8608	73.1086
MID1IP1	23	109	100	406.077	275.58	1.47353	65.3442	64.7379
Hs.562039	23	16	17	73.2975	49.7787	1.47247	67.6238	54.714
Hs.660409	13	40	24	91.8409	62.4067	1.47165	49.3087	61.6003
RPL34	4	151	131	2822.58	1918.12	1.47154	103.278	120.882
GEM	8	131	123	71.624	48.6871	1.47111	110.539	69.2082
Hs.655691	17	120	72	40.9349	27.8317	1.4708	176.208	55.1454
HIST1H2AC	6	99	93	187.976	127.857	1.4702	81.9844	99.1571
RASEF	9	156	104	202.367	137.68	1.46983	202.674	255.586
DDIT4	10	93	83	511.682	348.648	1.46762	57.9034	85.4668
CNTN2	1	139	113	578.162	394.027	1.46732	102.012	116.351
GNA13	17	195	156	376.527	256.658	1.46704	166.244	181.626
CDK2AP1	12	83	72	1590.75	1084.34	1.46702	76.5591	90.3767
LINC00869	1	160	121	70.1697	47.8499	1.46645	92.3693	70.7928
ACBD5	10	116	96	438.076	298.964	1.46531	134.905	167.506
IGSF11	3	112	93	206.247	140.775	1.46508	98.2352	87.4623
HIP1	7	220	178	75.6964	51.691	1.4644	115.035	105.154
HNRNPA3	2	304	268	536.99	366.76	1.46415	341.876	361.216
TRPS1	8	219	163	162.46	110.972	1.46398	153.179	129.862
KIF1C	17	198	163	73.244	50.0631	1.46303	89.8453	78.7927
INSR	19	173	131	73.6841	50.3712	1.46282	126.037	127.183
CCNL2	1	189	152	89.6587	61.3433	1.46159	140.906	140.23
LOC100505923	12	16	17	60.1437	41.1733	1.46074	48.584	28.342
FLJ38717	6	44	36	127.306	87.1535	1.46071	93.6212	84.2404
Hs.199759	2	16	17	32.5782	22.3265	1.45917	46.654	47.9484
MT2A	16	99	89	5379.51	3687.89	1.4587	69.8591	82.1654
Hs.658853	22	40	24	35.0451	24.0446	1.4575	64.5485	53.8292
IER5	1	93	83	72.7172	49.9066	1.45707	78.5265	61.0541
SLC22A3	6	155	130	62.1123	42.6386	1.45672	134.082	118.407
Hs.559586	1	16	17	32.6965	22.4555	1.45606	80.9341	39.2227
GNAI1	7	155	130	298.802	205.332	1.45522	117.683	124.905
AMER2	13	116	94	965.616	663.556	1.45521	78.8052	85.4777
Hs.656128	8	32	18	30.2162	20.7688	1.45488	48.1906	32.0522
Hs.128330	4	40	24	65.1488	44.7947	1.45438	37.9211	25.0125
P2RX7	12	99	91	103.908	71.4941	1.45338	97.1404	118.376
METTL23	17	88	77	139.517	95.9981	1.45333	94.129	106.007
AHR	7	115	108	495.893	341.268	1.45309	189.521	181.029
Hs.605206	4	40	24	153.731	105.814	1.45285	39.6658	25.0578
Hs.580205	2	16	17	32.4619	22.3461	1.45269	54.4821	44.3454
Hs.672284	15	40	24	113.407	78.0772	1.45249	52.1828	51.4503
ANAPC16	10	188	123	309.767	213.354	1.45189	73.2238	79.2257
CLK1	2	143	133	222.238	153.106	1.45154	93.7633	108.232
CPAMD8	19	68	53	112.194	77.3003	1.4514	78.0523	79.1711
SGK3	8	183	157	174.036	119.981	1.45052	114.902	114.794
Hs.607197	5	40	24	280.794	193.642	1.45006	25.4945	19.551
Hs.734867	17	40	24	45.8171	31.6067	1.4496	90.633	75.0464
Hs.655495	5	32	18	118.693	81.8991	1.44926	37.7337	30.4389
FNTB	14	220	178	187.586	129.535	1.44815	118.538	130.03
ZBTB16	11	131	123	216.188	149.353	1.4475	84.7566	94.9211
NLRP8	19	60	53	566.297	391.496	1.4465	212.728	176.22
HIST2H2BE	1	99	91	220.718	152.649	1.44592	68.0851	71.8944
MT1H	16	115	108	1295.52	896.241	1.4455	87.9652	104.473
Hs.542994	3	16	17	76.0604	52.6344	1.44507	47.867	49.1997
SNRNP70	19	208	187	185.287	128.244	1.4448	125.855	123.046
Hs.533067	3	32	18	41.6741	28.8484	1.44459	32.9966	24.3862
ZNF223	19	99	89	143.467	99.3332	1.4443	174.55	147.572
MXI1	10	171	160	326.112	226.098	1.44235	132.862	132.251
Hs.503001	11	40	24	74.2991	51.5186	1.44218	29.4907	26.1681
Hs.543809	5	16	17	53.5038	37.1106	1.44174	52.6639	37.0016
Hs.45247	16	16	17	36.2478	25.1463	1.44148	54.9367	53.0147
Hs.732685	11	16	9	9497.25	6589.18	1.44134	23.6655	59.4502
Hs.575532	8	16	17	56.2902	39.0848	1.44021	48.9362	38.6846
CLIP2	7	137	127	278.139	193.205	1.43961	119.728	108.538
Hs.585204	15	40	24	105.018	72.9656	1.43928	39.7695	26.4536
RPS21	20	164	149	847.11	588.969	1.43829	121.899	119.276
IRF2BP2	1	244	164	275.729	191.718	1.4382	135.374	130.681
RNASEH2C	11	108	75	84.2158	58.5582	1.43816	57.1996	53.6953
LRP4	11	93	83	223.821	155.704	1.43748	53.4459	45.943
Hs.604296	15	32	18	57.0226	39.6765	1.43719	81.3954	65.3906
Hs.566059	4	16	17	21.2923	14.8212	1.43661	52.448	35.5227
Hs.654855	23	65	56	2758.43	1921.73	1.43539	64.3711	81.2288
LINC00114	21	44	46	1256.09	875.179	1.43523	167.163	161.295
Hs.547430	14	16	17	31.8224	22.174	1.43512	41.6068	34.6792
FAM13A-AS1	4	16	11	45.5897	31.7748	1.43478	40.2716	40.6195
LOC644852	1	48	51	61.7671	43.0661	1.43424	95.6154	68.9302
Hs.593318	9	40	24	63.0407	43.9585	1.4341	59.8994	21.7552
YWHAE	17	190	175	360.167	251.167	1.43397	126.157	141.257
Hs.540615	16	16	17	32.611	22.7768	1.43176	58.2872	65.8568
GBP3	1	68	51	82.189	57.4104	1.4316	130.722	85.4277
Hs.686925	20	16	17	136.312	95.2659	1.43085	56.5351	39.9303
SNORA10	16	16	19	48.0748	33.6209	1.42991	34.2469	32.3854
Hs.644952	6	71	62	622.741	435.591	1.42965	99.5992	85.4784
Hs.132254	3	16	17	20.257	14.1785	1.42871	42.2938	31.9213
OR7A5	19	99	91	87.7146	61.4054	1.42845	81.7991	105.668
PRO0628	20	16	19	59.1227	41.4097	1.42775	63.1547	52.2978
GPRC5B	16	204	169	686.902	481.343	1.42705	139.48	137.702
MYRF	11	229	203	186.623	130.783	1.42697	142.151	155.991
PSRC1	1	137	125	211.768	148.464	1.42639	80.3874	86.9194
Hs.592414	3	65	56	601.89	422.293	1.42529	162.662	114.095
DNAJB4	1	180	162	88.1095	61.8652	1.42422	115.123	97.3945
Hs.737141	8	16	9	35.0386	24.6037	1.42412	32.5882	21.0774
C3	19	115	108	432.209	303.508	1.42405	103.218	127.403
KLHL2	4	99	89	374.433	262.96	1.42391	63.9637	67.6084
IGF1R	15	331	272	71.8624	50.4919	1.42324	143.564	122.973
PRR11	17	173	131	381.382	268.409	1.4209	142.221	150.136
Hs.737337	7	16	17	40.0631	28.2428	1.41852	44.3416	49.8602
Hs.650487	11	16	17	88.2265	62.2369	1.41759	57.1521	55.9625
UGT8	4	115	106	253.801	179.054	1.41745	117.669	130.986
BANF1	11	115	106	219.307	154.719	1.41745	85.0258	88.2599
AIF1L	9	124	98	750.467	529.501	1.41731	138.716	126.231
CEBPD	8	164	145	344.541	243.133	1.41709	102.387	122.052
PPP1R15B	1	84	68	122.871	86.7157	1.41694	90.1685	106.885
FRYL	4	258	218	223.462	157.736	1.41669	105.479	114.676
ZBTB18	1	208	187	120.662	85.1853	1.41646	194.78	133.877
Hs.575543	8	16	17	76.2099	53.8354	1.41561	65.2519	53.0305
SLC14A1	18	149	128	242.857	171.574	1.41546	114.899	172.372
PLEKHA4	19	99	89	35.46	25.0628	1.41485	248.141	95.3306
Hs.579546	18	16	17	27.3919	19.3614	1.41477	47.5268	34.312
STAT2	12	204	169	220.457	155.891	1.41418	148.132	153.651
CNDP1	18	68	51	1302.17	920.961	1.41392	64.6003	75.7503
Hs.538913	11	16	17	24.5075	17.3367	1.41362	62.7823	46.2719
GBP1	1	260	210	75.6738	53.5364	1.4135	207.22	132.178
FMNL2	2	176	126	704.356	498.31	1.41349	150.147	157.53
GPR1	2	115	106	111.644	79.0587	1.41216	271.129	216.674
MYEOV2	2	84	62	939.481	665.446	1.41181	125.091	139.899
Hs.582113	5	16	17	83.1447	58.9262	1.411	60.5966	51.8165
EPC2	2	68	51	100.835	71.4813	1.41065	70.5107	67.9526
Hs.312050	6	16	17	21.4777	15.2305	1.41018	51.5914	29.4883
Hs.662792	2	40	24	73.3493	52.0159	1.41013	52.4919	46.2599
Hs.124358	15	16	17	43.8576	31.1043	1.41002	43.5944	74.7826
Hs.202577	3	80	48	303.202	215.11	1.40952	84.0674	86.0668
Hs.368399	15	40	24	316.767	224.843	1.40884	30.0654	26.592
USP49	6	189	142	197.787	140.426	1.40847	268.943	232.66
Hs.435644	4	16	9	12.7383	9.0462	1.40813	38.0578	65.8031
DDX6	11	155	124	162.471	115.402	1.40786	144.064	156.797
RAPGEF3	12	164	149	76.9517	54.6664	1.40766	121.8	84.9584
Hs.191464	5	16	17	38.0618	27.0431	1.40745	54.9456	44.9551
PTGES3	12	99	89	838.736	595.976	1.40733	77.1781	72.2735
Hs.677055	15	16	17	27.2683	19.3772	1.40724	61.3752	37.6609
GLTP	12	139	113	782.11	555.891	1.40695	97.495	115.421
Hs.529962	6	56	41	96.3422	68.49	1.40666	64.4682	68.0291
Hs.731885	12	65	56	107.575	76.4755	1.40666	44.0323	38.7484
FTH1	11	164	149	2437.36	1734.38	1.40532	91.5201	125.514
LOC642947	9	32	36	2055.06	1462.92	1.40476	118.958	121.46
Hs.544392	6	16	17	20.0816	14.3083	1.40349	66.3879	37.6916
ST6GALNAC3	1	84	70	130.349	92.8821	1.40338	61.1638	48.0817
RPL29	3	180	168	602.127	429.713	1.40123	86.6635	97.7385
ERBB2IP	5	195	154	422.907	301.97	1.40049	114.041	120.319
MAGT1	23	198	167	374.27	267.248	1.40046	206.467	193.601
MYL9	20	115	106	60.2242	43.0065	1.40035	133.29	88.9193
Hs.551143	9	16	17	85.566	61.1873	1.39843	47.6334	41.365
ZNF488	10	52	34	206.698	147.821	1.3983	51.3397	40.0877
YBX1	1	164	147	367.859	263.182	1.39774	106.535	104.134
WSB1	17	385	341	212.711	152.246	1.39715	131.977	136.573
Hs.551898	11	32	26	42.2951	30.2747	1.39705	42.9562	40.3644
CXCL9	4	99	89	32.7509	23.4437	1.397	347.103	50.8102
ZSWIM8	10	158	139	93.2313	66.7412	1.39691	98.225	97.5624
ANKRD37	4	108	75	133.214	95.3729	1.39677	123.191	93.3908
CPOX	3	83	72	190.8	136.628	1.39649	91.3814	100.236
HS6ST1	2	204	169	92.4085	66.2309	1.39525	196.998	209.183
CHN2	7	261	243	161.013	115.452	1.39463	134.245	132.296
Hs.707742	1	195	168	51.115	36.6551	1.39448	112.663	91.7441
MALAT1	11	416	259	631.426	452.951	1.39403	210.659	258.8
Hs.638668	5	16	17	40.4851	29.0586	1.39322	53.9118	37.2266
FAM221A	7	68	55	115.118	82.6299	1.39318	79.0541	95.8275
PHLPP1	18	158	139	138.046	99.1251	1.39265	111.086	117.362
Hs.664803	7	56	41	66.6835	47.8991	1.39217	50.6155	35.1551
CLDN11	3	133	107	983.792	706.805	1.39189	120.885	134.123
Hs.644466	7	65	56	25.4967	18.3285	1.39109	102.547	83.1062
AHSA1	14	99	89	360.223	258.963	1.39102	62.4405	51.2534
Hs.539623	13	16	17	38.372	27.5914	1.39073	54.5319	33.5245
Hs.396796	1	40	24	118.458	85.2799	1.38905	31.2924	30.7274
CAPN2	1	164	145	269.084	193.807	1.38841	123.196	115.891
Hs.745073	4	40	24	1627.33	1172.11	1.38837	25.8134	37.3175
DAZAP1	19	207	164	108.249	77.9869	1.38805	80.1659	83.3769
Hs.565130	18	16	17	43.3307	31.2171	1.38804	56.7517	36.4478
Hs.567518	16	40	24	76.4204	55.0605	1.38793	42.1071	31.3409
Hs.541031	18	16	17	24.4046	17.5845	1.38784	59.937	40.8769
KCTD4	13	108	75	50.0895	36.1017	1.38746	72.0543	46.0389
LCOR	10	156	126	150.786	108.726	1.38685	70.109	64.1586
LOC440157	14	28	29	90.5863	65.3409	1.38636	88.4765	65.8621
ABCA8	17	147	126	274.438	198.117	1.38523	104.418	105.787
Hs.544873	7	16	17	33.9688	24.5279	1.3849	52.4952	29.1755
C9orf64	9	108	77	248.29	179.29	1.38485	105.688	99.0553
Hs.662133	17	40	24	63.0652	45.5451	1.38468	72.3421	53.4816
Hs.652334	1	40	24	42.6053	30.7709	1.38459	61.1478	46.6204
Hs.688244	1	16	17	148.057	106.96	1.38422	64.6239	45.001
Hs.540356	15	16	17	27.6084	19.9458	1.38417	46.6133	32.3146
CD74	5	175	149	514.269	371.556	1.3841	109.984	100.826
RPL9	4	155	138	2737.46	1978.75	1.38343	91.5508	98.093
Hs.568705	1	16	17	34.3363	24.8237	1.3832	53.5452	25.2158
Hs.568326	8	16	17	44.024	31.8357	1.38285	72.2008	71.2831
ATF4	22	131	123	697.509	504.453	1.3827	90.5606	108.713
Hs.615573	7	16	17	26.0017	18.8102	1.38232	29.1235	36.2826
DNAJB2	2	115	108	659.968	477.538	1.38202	138.678	140.506
PXK	3	100	69	454.843	329.19	1.3817	63.7505	71.6651
RPL23	17	99	93	898.36	650.195	1.38168	55.518	59.9421
TPT1	13	304	270	5596.48	4053.25	1.38074	58.8961	72.7447
UBXN2A	2	68	51	453.008	328.095	1.38072	55.688	62.3618
Hs.705789	9	170	136	62.6097	45.3488	1.38063	97.2335	97.45
Hs.538611	10	16	17	35.0916	25.419	1.38053	42.2784	38.5914
FAM107B	10	108	79	962.833	697.472	1.38046	39.9665	52.9456
KANSL1L	2	149	116	37.0936	26.8714	1.38041	64.4935	47.4407
Hs.554608	17	16	17	22.4892	16.2975	1.37992	71.8914	56.9731
GPNMB	7	131	117	114	82.6321	1.37961	100.047	69.2142
Hs.655980	11	40	24	86.2624	62.5523	1.37904	42.1827	38.0721
Hs.382856	1	16	9	13.678	9.9203	1.37879	38.2268	40.5587
NEK7	1	109	102	207.96	150.868	1.37842	99.5812	101.358
Hs.690052	1	40	24	92.3068	66.9794	1.37814	31.6271	34.7699
Hs.560705	19	16	9	13.7613	9.98617	1.37804	37.2181	52.4341
SASH1	6	214	184	593.755	430.892	1.37797	72.6404	79.0985
Hs.606326	3	40	24	104.941	76.1593	1.37791	38.3758	32.8843
Hs.506258	3	16	9	39.2236	28.4692	1.37776	24.7298	22.5614
Hs.660221	20	80	48	313.004	227.355	1.37672	66.4248	76.444
Hs.622790	1	16	17	73.9438	53.7324	1.37615	32.7901	29.5001
FOXO4	23	99	91	153.227	111.348	1.3761	143.654	130.037
TCHP	12	108	75	80.0088	58.1447	1.37603	82.7551	72.3056
Hs.347034	10	16	17	161.1	117.09	1.37586	38.9453	44.0633
Hs.713972	6	40	24	67.5477	49.1079	1.3755	46.7787	50.4683
Hs.707170	17	65	56	236.34	171.853	1.37524	101.18	147.63
PEX5L	3	229	172	200.466	145.79	1.37503	104.789	121.119
Hs.118769	2	40	24	70.2172	51.0725	1.37485	26.0117	21.4437
Hs.670239	19	65	56	82.1307	59.7395	1.37481	65.1074	84.0473
Hs.662697	13	40	24	65.8537	47.904	1.3747	45.3062	53.8187
Hs.563305	5	16	17	19.2199	13.9845	1.37437	36.4408	21.9826
Hs.248158	2	40	24	753.986	548.646	1.37427	36.453	28.8209
METTL7A	12	223	195	459.302	334.24	1.37417	186.932	176.361
Hs.601660	10	40	24	54.1428	39.4204	1.37347	76.7496	54.5638
WAC	10	362	279	491.409	357.803	1.37341	236.867	170.404
PAPOLA	14	377	322	170.479	124.149	1.37318	109.977	108.789
BSN-AS2	3	16	9	21.3248	15.5344	1.37274	20.7816	37.9255
BTG1	12	180	154	194.954	142.066	1.37228	89.5589	84.9022
Hs.552421	17	16	17	20.2865	14.7832	1.37226	37.6613	34.6471
JAKMIP3	10	84	70	163.635	119.272	1.37194	62.6773	74.2652
Hs.542738	22	16	17	32.6452	23.7987	1.37172	54.0725	24.1002
Hs.436014	5	16	17	19.6142	14.3011	1.37151	54.8077	30.7152
MEGF10	5	140	101	323.945	236.393	1.37037	101.681	93.765
Hs.637111	15	16	17	35.719	26.0667	1.37029	49.198	47.3671
ZNF420	19	108	79	95.7694	69.8946	1.3702	84.9396	83.3035
PLXNB3	23	99	89	78.5299	57.3158	1.37013	65.7135	78.0479
FAM161B	14	68	51	208.562	152.229	1.37006	87.7472	105.295
Hs.656171	13	65	56	36.6515	26.7578	1.36975	102.616	85.8584
TMEM241	18	108	77	292.61	213.637	1.36966	78.8666	77.8392
Hs.407573	2	16	9	50.3291	36.7484	1.36956	32.3661	24.744
ERBB3	12	280	233	199.42	145.609	1.36955	173.178	152.495
TPPP	5	219	161	503.264	367.508	1.3694	186.79	202.55
ACTN4	19	99	89	231.601	169.192	1.36887	72.5482	85.8231
Hs.720460	3	32	18	40.5452	29.6216	1.36877	42.4793	41.3911
QDPR	4	115	98	3048.99	2228.06	1.36845	70.8196	74.2103
PSAT1	9	167	138	465.913	340.48	1.3684	128.534	142.439
Hs.566332	5	16	17	44.9507	32.8501	1.36836	49.2025	44.8736
SNORD38B	1	16	17	34.469	25.1909	1.36831	57.144	30.3569
HMGN3	6	109	100	447.742	327.263	1.36814	129.766	105.958
SALL1	16	139	113	196.918	143.945	1.36801	134.035	208.565
ECHDC1	6	229	176	169.688	124.044	1.36797	137.287	125.003
CABLES1	18	124	84	319.803	233.962	1.3669	117.766	108.574
FKBP4	12	196	165	148.3	108.548	1.36621	111.613	94.9495
TIMMDC1	3	68	51	575.973	421.654	1.36598	65.5503	73.5178
ANGPT2	8	244	193	53.4324	39.1177	1.36594	131.1	127.742
CP	3	260	204	76.6319	56.1049	1.36587	92.7653	125.727
Hs.733467	12	40	24	50.6074	37.0549	1.36574	55.6263	39.1177
GABRG1	4	84	60	231.023	169.171	1.36562	128.506	107.25
CBR1	21	99	91	224.365	164.387	1.36486	81.3693	82.2374
Hs.584406	23	16	17	26.9048	19.7138	1.36477	40.9642	54.1444
RELN	7	115	108	147.955	108.41	1.36477	93.9142	163.893
LMAN1	18	204	169	116.03	85.0199	1.36474	181.462	204.869
Hs.551274	1	16	17	21.023	15.4066	1.36454	43.8004	32.8244
ZNF227	19	133	107	52.3759	38.4021	1.36388	85.5171	73.7586
Hs.269941	12	40	24	178.009	130.521	1.36384	25.8038	28.2391
Hs.553451	2	16	17	22.9752	16.8493	1.36357	46.4011	42.2375
QSER1	11	229	172	71.3284	52.3369	1.36287	142.421	133.868
FAM171A1	10	93	85	897.926	659.013	1.36253	64.2293	68.7929
Hs.170646	2	16	17	25.9911	19.0762	1.36249	71.122	41.0904
Hs.569853	18	16	17	38.46	28.2307	1.36235	36.0145	29.7501
RPS24	10	155	130	2849.45	2092.72	1.3616	91.5725	103.928
SKI	1	204	169	89.7837	65.9427	1.36154	184.92	194.64
GAB1	4	348	269	119.457	87.7396	1.36149	110.243	129.888
MIEN1	17	68	51	311.872	229.079	1.36142	82.0585	116.046
Hs.608666	3	65	56	111.47	81.8872	1.36126	78.7394	101.121
Hs.665440	20	40	24	54.2274	39.8554	1.3606	63.0137	33.9839
LATS2	13	148	99	56.6388	41.6429	1.36011	79.9417	75.7659
ZNF652	17	229	172	221.158	162.618	1.35999	177.03	179.111
Hs.652834	5	16	17	55.2912	40.6625	1.35976	70.864	40.8108
Hs.545102	7	16	17	33.4528	24.6042	1.35964	73.4645	49.955
CFD	19	99	89	39.5657	29.1109	1.35913	144.852	83.4328
HIPK2	7	451	319	792.571	583.19	1.35903	135.09	140.333
Hs.720000	15	40	24	57.8517	42.5772	1.35875	91.6914	81.1763
ZCCHC24	10	158	139	811.76	597.443	1.35872	50.5604	69.2369
SNX9	6	108	75	129.538	95.3636	1.35836	59.5549	72.1736
CAPN3	15	301	268	396.619	292.044	1.35808	104.076	106.433
Hs.660744	9	40	26	105.291	77.5298	1.35807	44.0891	23.9885
Hs.544275	5	16	17	27.4009	20.1774	1.358	78.2759	36.8691
TMEM165	4	259	185	195.388	143.886	1.35794	153.182	156.933
POLR2J	7	93	85	210.191	154.815	1.35769	87.4807	120.595
Hs.112482	11	56	41	39.4383	29.05	1.3576	123.486	66.202
Hs.579352	17	16	17	27.9211	20.5668	1.35758	66.4571	37.7293
TAPT1	4	318	239	91.222	67.2199	1.35707	185.557	172.003
Hs.665343	9	16	9	17.3171	12.7632	1.3568	30.3844	49.0533
ZNF69	19	28	27	348.605	256.987	1.35651	138.058	112.683
FAM107A	3	164	145	1838.97	1355.71	1.35646	78.6504	93.2858
RPL13A	19	359	317	2171.54	1601.43	1.356	68.6911	77.9467
PHF10	6	133	109	224.902	165.864	1.35594	103.699	124.797
PTPRQ	12	16	21	40.0086	29.5107	1.35573	39.655	37.2864
FIGN	2	148	103	51.58	38.0469	1.35569	82.1276	67.5562
Hs.158951	19	40	24	53.7326	39.6385	1.35557	54.7551	37.788
SLC16A12	10	44	48	1161.32	856.87	1.35531	151.19	140.708
Hs.649302	9	40	24	634.537	468.265	1.35508	27.9021	30.2309
PRTN3	19	99	89	18.8804	13.9332	1.35506	288.928	54.1891
FAM222A	12	68	51	215.609	159.129	1.35493	52.5649	48.987
LUC7L3	17	319	275	269.752	199.105	1.35482	121.411	121.008
HILPDA	7	115	98	188.274	138.993	1.35456	134.011	107.849
SAT2	17	68	51	365.006	269.472	1.35453	50.7925	44.8539
CSRP1	1	99	91	1615.16	1192.62	1.35429	52.8523	66.0365
BCR	22	280	249	100.131	73.9469	1.35409	162.913	120.284
Hs.733885	17	40	24	69.7462	51.5092	1.35405	35.4424	39.5366
Hs.357612	6	16	17	26.7365	19.7593	1.35311	33.8177	39.3251
CTSS	1	204	169	64.7576	47.8638	1.35295	126.228	119.332
PLCL1	2	155	130	116.064	85.7917	1.35285	68.1452	67.8742
YY1	14	420	343	214.965	158.905	1.35279	111.294	117.267
CPM	12	384	298	52.9377	39.1336	1.35274	100.478	84.3584
MLKL	16	116	102	66.4902	49.1605	1.35251	79.2817	75.3738
Hs.586830	14	40	24	101.185	74.8147	1.35248	59.1607	45.8471
RBM6	3	155	122	112.666	83.3142	1.35231	75.0836	65.9911
CCDC152	5	40	24	335.551	248.141	1.35226	84.2939	83.8206
Hs.610707	6	16	17	77.2768	57.1651	1.35182	62.366	65.077
SMIM15	5	56	43	247.672	183.238	1.35164	65.2013	87.2181
Hs.659582	4	16	17	111.063	82.1793	1.35147	41.7989	25.7564
Hs.521005	8	16	17	25.732	19.0402	1.35146	58.6775	40.4872
KMT2C	7	336	251	136.809	101.237	1.35138	151.677	139.15
LOC645321	18	80	48	90.284	66.8153	1.35125	111.935	70.5011
DTX3L	3	68	51	99.8228	73.9463	1.34994	92.1552	105.203
LOC645895	8	16	17	4605.36	3411.63	1.3499	42.7514	42.7106
NFIC	19	320	271	219.272	162.46	1.3497	156.037	214.957
Hs.600087	21	56	41	50.0948	37.1219	1.34947	66.5344	41.2272
HLA-DPA1	6	158	141	464.344	344.152	1.34924	109.884	107.921
NCAM1	11	474	392	277.633	205.779	1.34918	129.821	125.703
Hs.223741	2	16	17	29.9013	22.1676	1.34887	68.1139	30.9691
SERTAD4-AS1	1	40	26	127.149	94.2673	1.34881	46.2218	41.0651
FOXP1-IT1	3	16	17	170.856	126.676	1.34876	51.3821	50.7785
Hs.427242	7	16	17	43.8279	32.4999	1.34855	57.3063	60.1231
Hs.570324	20	16	17	19.7928	14.6816	1.34814	53.2567	31.6278
Hs.519466	5	16	17	30.2788	22.4625	1.34797	58.4739	40.9624
FAM200B	4	120	74	401.728	298.084	1.3477	86.2126	70.0711
IGLC1	22	495	430	25.9514	19.2586	1.34752	380.309	70.5718
DLGAP1-AS1	18	112	84	51.5811	38.2852	1.34729	114.61	95.8647
MAT2A	2	229	205	423.686	314.486	1.34723	145.178	158.385
DNAJC28	21	141	134	633.815	470.702	1.34653	218.245	218.245
MPO	17	164	145	24.6921	18.3419	1.34621	374.009	46.0544
Hs.91145	2	40	24	57.5001	42.7175	1.34606	83.8159	60.0019
HIP1R	12	271	252	186.696	138.704	1.34601	96.6204	106.146
Hs.648496	23	40	24	87.4203	64.9624	1.34571	70.4943	31.186
Hs.539415	12	16	17	36.9238	27.4391	1.34566	44.9216	56.355
ZBTB44	11	221	166	163.31	121.396	1.34526	108.402	116.695
Hs.565838	3	16	17	27.1169	20.1584	1.34519	31.9052	31.8359
Hs.661310	2	40	24	38.745	28.8107	1.34481	100.017	81.702
Hs.662501	12	40	24	136.09	101.207	1.34467	44.2226	44.5774
GJA1	6	99	89	1675.87	1246.33	1.34464	71.9164	66.6291
TSC22D4	7	115	98	506.109	376.395	1.34462	203.934	207.865
TTYH2	17	152	117	348.996	259.612	1.3443	135.867	131.629
Hs.735516	3	16	9	96.7442	71.9778	1.34409	38.6353	41.4249
PLOD3	7	99	89	235.3	175.084	1.34393	78.7111	82.0307
C10orf54	10	96	67	218.876	162.957	1.34316	93.5757	84.7803
Hs.624550	23	16	9	43.7391	32.5656	1.34311	36.5592	20.0306
PITPNA-AS1	17	40	24	107.083	79.7443	1.34282	46.9831	42.3144
Hs.134939	23	16	17	29.0767	21.6549	1.34273	40.892	31.5576
Hs.732795	3	16	9	24.8876	18.5352	1.34272	39.7018	54.5516
USP19	3	133	109	68.4484	50.9874	1.34246	123.7	117.244
COBL	7	109	94	448.775	334.382	1.3421	54.0587	63.9469
DPYSL2	8	99	89	2915.07	2172.34	1.3419	79.961	68.3494
SPARC	5	99	89	1965.92	1465.07	1.34186	53.1584	55.9548
Hs.732051	19	65	56	101.385	75.5707	1.3416	85.434	82.6395
CIZ1	9	294	259	47.3198	35.2713	1.34159	77.594	82.5924
CCSAP	1	116	80	174.535	130.125	1.34129	120.662	113.362
Hs.556027	9	40	24	113.679	84.7618	1.34116	45.39	37.6479
GPM6B	23	267	239	1885.89	1406.33	1.341	87.228	95.6092
Hs.567208	23	16	17	31.5942	23.5603	1.34099	56.1713	50.5264
ACTB	7	450	374	3404.31	2539.03	1.34079	90.4995	104.982
Hs.550111	1	16	17	51.5005	38.4145	1.34065	68.6965	77.0754
Hs.744531	1	40	24	213.189	159.038	1.34049	28.2959	23.7141
Hs.661796	7	16	17	260.865	194.61	1.34045	53.994	51.62
Hs.521575	8	16	17	21.0497	15.7072	1.34013	50.8263	33.9773
AUP1	2	115	106	98.1462	73.2534	1.33982	70.6953	67.4292
LHPP	10	99	91	815.437	608.711	1.33961	99.7275	120.846
SLAIN1	13	84	70	1042.45	778.652	1.33879	54.1301	69.053
LSS	21	273	245	148.972	111.281	1.3387	124.157	113.164
Hs.563743	1	16	17	26.4452	19.7578	1.33847	61.3747	44.7593
Hs.543781	5	16	17	41.6863	31.1515	1.33818	47.798	49.5242
SNHG1	11	40	28	138.292	103.38	1.33771	47.2117	67.8056
Hs.584618	23	16	17	32.8196	24.5349	1.33767	50.2907	66.1292
RPL5	1	164	149	841.03	628.772	1.33757	118.814	116.802
SCARNA9	11	16	19	93.8377	70.1708	1.33727	38.9941	40.3431
Hs.208125	14	32	18	18.8071	14.0652	1.33714	30.8282	46.8213
Hs.732334	1	40	24	33.7876	25.2707	1.33702	64.465	38.6166
Hs.656954	17	40	24	54.4679	40.7498	1.33664	43.4129	25.8283
Hs.580116	2	16	17	22.3542	16.7295	1.33622	52.2499	47.126
Hs.592515	15	40	26	260.508	195.004	1.33591	51.6904	55.2297
Hs.547704	5	16	17	32.4453	24.2879	1.33586	49.3625	41.3169
Hs.694877	10	40	24	51.8965	38.8489	1.33586	101.985	86.5015
TDRD1	10	115	108	79.6277	59.6106	1.3358	147.837	123.474
Hs.650411	5	16	17	32.4368	24.295	1.33513	80.4304	55.9559
GPBP1	5	124	92	389.305	291.663	1.33477	69.65	72.7747
KIF5B	10	204	171	620.065	464.677	1.3344	111.635	133.748
TF	3	294	257	2320.19	1738.86	1.33432	125.073	148.661
EGLN1	1	219	161	185.269	138.87	1.33412	198.677	212.99
SGMS1	10	93	83	80.6465	60.4547	1.334	75.2335	85.4162
Hs.658643	19	56	41	85.7606	64.2952	1.33386	45.2267	38.1649
Hs.654969	2	40	24	169.013	126.741	1.33353	34.7166	30.7096
C1orf213	1	72	62	77.531	58.1433	1.33345	74.4378	73.324
PAQR8	6	108	75	1526.5	1145.34	1.3328	46.9026	51.2921
Hs.578161	14	16	17	111.051	83.3481	1.33238	46.9778	33.0377
Hs.649782	7	16	17	46.2859	34.7399	1.33235	49.2732	37.1848
DFNB31	9	158	141	66.6185	50.0237	1.33174	77.0874	74.1696
BAG3	10	99	89	361.942	271.787	1.33171	82.0758	83.5597
Hs.580342	2	16	17	29.0923	21.8485	1.33155	67.9403	32.5559
Hs.245558	8	16	17	27.7582	20.8475	1.33148	52.4064	58.6462
SOX10	22	164	145	236.517	177.652	1.33136	82.829	90.2394
MTSS1L	16	125	101	35.7636	26.8635	1.33131	152.421	126.519
MOB3B	9	189	144	235.53	176.922	1.33127	99.1805	84.5737
FGF1	5	218	198	408.293	306.696	1.33126	111.666	118.469
SOCS7	17	189	148	82.4038	61.9062	1.33111	110.387	113.602
PRIMA1	14	84	70	133.106	100.034	1.3306	95.8226	114.082
LOC644215	10	16	17	26.0545	19.5811	1.33059	42.9324	38.8009
ANAPC11	17	184	151	267.88	201.395	1.33012	167.456	164.147
IL18	11	99	89	973.401	731.891	1.32998	169.551	165.237
LOC390714	16	16	17	21.853	16.4319	1.32992	42.2425	38.4218
Hs.126962	19	56	41	52.8894	39.7805	1.32953	64.6023	53.382
LOC100128288	17	16	11	33.6926	25.3473	1.32924	43.5556	29.0897
Hs.517520	22	16	17	37.5401	28.242	1.32923	54.0842	45.4501
Hs.733102	3	40	24	146.786	110.454	1.32893	52.1363	63.3796
Hs.541440	2	16	17	27.9378	21.0256	1.32875	43.5183	34.9859
UACA	15	208	150	112.32	84.542	1.32857	192.844	188.353
C1orf162	1	68	51	196.771	148.113	1.32852	90.5834	81.2995
ANKRD36	2	181	162	38.7206	29.149	1.32837	172.453	99.9112
METTL16	17	173	133	73.076	55.0215	1.32814	119.512	114.64
Hs.573368	7	16	17	24.6507	18.5613	1.32807	55.4926	27.308
Hs.548369	10	16	17	21.422	16.1339	1.32777	52.0839	33.1123
EVI2A	17	143	131	383.749	289.14	1.32721	102.749	105.984
ZNF281	1	139	113	113.935	85.8518	1.32712	86.9075	92.157
RNF130	5	236	197	224.677	169.299	1.32711	98.6355	98.4489
ZNF322	6	149	126	89.4227	67.3864	1.32701	102.548	108.928
MIR100HG	11	40	26	475.992	358.699	1.32699	33.7271	37.7772
Hs.599338	9	65	56	56.5043	42.5867	1.32681	81.9452	84.0199
DUSP1	5	204	169	273.373	206.052	1.32672	120.457	113.311
Hs.562106	1	16	17	29.6257	22.3311	1.32666	59.3148	54.0149
Hs.551093	6	16	17	19.0194	14.3391	1.3264	57.9744	20.7764
Hs.566771	7	16	17	21.3635	16.1076	1.3263	112.949	30.4862
DMC1	22	180	162	153.775	115.946	1.32627	346.149	294.704
PPARA	22	428	319	53.5508	40.3782	1.32623	108.602	88.6013
PTPRJ	11	204	171	57.5555	43.4045	1.32602	151.992	150.374
Hs.542612	21	16	17	24.9449	18.8183	1.32557	58.2381	28.1052
Hs.634964	14	40	24	31.3702	23.667	1.32548	81.8952	54.8964
SSBP3-AS1	1	40	26	81.1168	61.2049	1.32533	39.7552	42.3189
JUP	17	143	131	59.7412	45.0848	1.32509	114.302	105.169
Hs.542837	3	16	17	39.7379	29.9915	1.32497	68.0482	47.3439
SP4	7	155	130	81.0122	61.1659	1.32447	118.939	112.181
Hs.132293	9	16	17	33.0069	24.9269	1.32415	55.8966	44.7385
Hs.659023	2	40	24	52.6088	39.7321	1.32409	74.9218	64.543
Hs.705718	6	65	56	61.4842	46.457	1.32347	81.7958	71.5454
Hs.543924	5	16	17	36.8291	27.8292	1.3234	47.1483	38.9262
Hs.708272	6	40	24	257.831	194.867	1.32311	38.3522	62.5463
MGC16142	7	16	11	31.6042	23.8886	1.32298	26.4173	27.3484
Hs.613974	9	16	17	110.641	83.6472	1.32271	38.7235	36.5012
RPL23A	17	334	287	4439.26	3356.35	1.32265	70.6098	86.0732
Hs.663140	3	40	24	47.7876	36.1395	1.32231	84.6644	57.8047
Hs.657736	10	40	24	34.7222	26.2657	1.32196	88.1265	75.889
OVOS	12	16	19	33.7999	25.5689	1.32191	50.8846	51.9128
LUC7L	16	243	191	110.826	83.8417	1.32184	95.4615	89.7435
Hs.656129	5	40	24	114.487	86.6296	1.32157	60.0977	50.8788
Hs.560644	19	16	17	28.8767	21.853	1.32141	83.3667	35.1777
Hs.709650	15	40	24	173.514	131.311	1.3214	46.0253	41.8126
JUND	19	269	225	618.41	468.075	1.32118	200.666	186.377
TMEM50A	1	139	113	265.759	201.17	1.32107	95.2568	87.3161
Hs.744461	6	40	24	153.959	116.557	1.3209	30.5218	19.1737
MT1X	16	170	153	2746.15	2079.12	1.32082	60.6813	104.085
KIZ	20	253	179	149.541	113.228	1.3207	148.358	131.6
ADIPOR2	12	93	83	798.66	604.733	1.32068	48.9083	60.1795
Hs.340072	1	16	17	33.3246	25.2478	1.3199	48.6122	44.6653
C1orf132	1	72	60	48.675	36.88	1.31982	78.9405	49.7603
MYO18A	17	44	46	100.337	76.0329	1.31965	70.8111	60.2407
GLUL	1	341	292	780.98	591.884	1.31948	151.317	156.587
PPAP2C	19	131	123	86.0875	65.2705	1.31893	72.9405	84.5211
Hs.26922	5	16	17	27.2584	20.6751	1.31842	69.5566	43.4087
Hs.194081	1	40	24	233.473	177.09	1.31838	36.6064	28.9431
Hs.639778	10	16	17	27.9107	21.1722	1.31827	40.3918	29.9407
TRIM4	7	180	127	120.174	91.1649	1.3182	131.886	96.7977
MYOT	5	99	89	147.252	111.708	1.31819	67.5696	100.267
Hs.598973	11	40	24	14.1696	10.7506	1.31803	84.2161	50.6006
MTUS1	8	351	305	260.363	197.58	1.31776	144.072	152.716
Hs.595302	17	40	24	53.1592	40.3458	1.31759	60.788	56.0224
Hs.542955	3	16	17	28.5201	21.6499	1.31733	50.1599	44.6377
Hs.744204	2	40	24	25.0489	19.0167	1.31721	39.1405	31.851
Hs.545636	9	16	17	22.6255	17.1778	1.31714	54.8044	39.3699
DDX17	22	384	331	369.939	280.917	1.3169	175.649	189.033
Hs.572742	2	16	17	29.7533	22.5957	1.31677	37.4341	83.1969
Hs.147090	4	16	17	26.154	19.8646	1.31662	57.2932	37.4942
Hs.577495	12	16	19	40.1924	30.5334	1.31634	44.625	34.2611
MCM8	20	152	117	399.745	303.711	1.3162	237.19	212.188
Hs.583078	7	16	17	33.7937	25.6795	1.31598	48.9418	44.6909
Hs.540718	17	16	17	30.7801	23.3896	1.31598	83.4022	40.3217
Hs.552554	6	16	17	33.7065	25.614	1.31594	38.0952	41.7688
RAB11FIP4	17	278	211	94.2837	71.6554	1.31579	147.782	159.063
Hs.732588	5	65	56	46.0855	35.0293	1.31563	63.8883	52.5556
Hs.564831	15	16	17	37.8503	28.7732	1.31547	63.5824	51.1807
GPS2	17	99	89	117.745	89.5487	1.31487	41.6642	49.2285
Hs.576910	10	16	17	35.8559	27.2716	1.31477	52.3876	22.762
BLZF1	1	261	231	136.198	103.599	1.31466	368.788	297.024
Hs.633518	5	80	48	69.0997	52.5631	1.3146	71.3055	40.5187
ARHGEF37	5	124	92	237.39	180.644	1.31414	103.565	92.1583
Hs.279770	19	16	17	31.2783	23.802	1.3141	53.3078	34.6868
ZNF84	12	123	96	111.181	84.6718	1.31309	109.334	122.907
RPS11	19	188	160	2362.08	1798.88	1.31309	96.6951	100.855
TCF7L2	10	458	393	155.583	118.49	1.31304	310.797	218.37
SHC4	15	68	51	99.7387	75.9725	1.31283	68.5011	58.7891
Hs.565815	22	16	17	27.4696	20.9283	1.31256	55.142	41.1771
CTCFL	20	109	92	78.8067	60.048	1.31239	147.01	142.37
Hs.608916	6	16	17	39.1714	29.8519	1.31219	61.8316	40.7599
Hs.733882	6	40	24	421.579	321.318	1.31203	53.995	64.286
Hs.537847	1	16	17	27.6202	21.0541	1.31187	43.4154	42.1898
AEBP1	7	99	89	125.748	95.8637	1.31174	77.4585	76.0513
SNX18	5	100	77	278.433	212.334	1.3113	135.999	156.406
KIAA1598	10	93	89	1151.91	878.464	1.31128	53.9238	67.5629
Hs.666766	16	40	24	63.9481	48.7677	1.31128	40.5791	30.9887
CDC14B	9	495	413	146.968	112.082	1.31125	433.89	377.426
Hs.397593	2	16	17	25.3967	19.3744	1.31084	48.949	38.9249
BRI3	7	108	77	320.953	244.87	1.31071	97.079	75.4507
Hs.431550	2	80	48	498.572	380.463	1.31044	33.0269	38.0791
HDAC11	3	133	111	179.503	137.017	1.31008	129.574	133.9
S100A1	1	99	91	307.147	234.539	1.30958	52.9319	66.9119
Hs.593351	7	40	24	76.8737	58.7087	1.30941	31.8189	32.5081
Hs.663015	11	40	24	60.0633	45.8778	1.3092	60.8789	48.0897
Hs.650447	10	16	17	32.3843	24.7389	1.30905	48.3338	41.0926
Hs.593461	13	40	24	104.619	79.9274	1.30893	60.4436	40.2178
CRIPAK	4	108	75	79.0194	60.3864	1.30856	61.5788	54.6197
JADE2	5	198	165	115.722	88.4356	1.30854	111.724	108.528
RPL39	23	99	95	2502.91	1913.13	1.30828	48.3502	67.0908
RPS10	6	389	340	2264.71	1731.21	1.30817	91.7264	117.476
TMEM140	7	93	83	116.301	88.9169	1.30798	89.7414	82.9743
RPS3A	4	291	264	2412.49	1844.93	1.30763	98.2662	118.308
FBXO45	3	136	89	81.2005	62.116	1.30724	66.0463	60.0502
Hs.544050	5	16	17	25.7889	19.7327	1.30691	50.8122	32.1434
Hs.387918	20	16	17	27.1127	20.7459	1.3069	42.4704	36.0165
ATXN1L	16	112	86	201.434	154.169	1.30658	62.0314	74.2947
Hs.630409	21	16	17	28.6285	21.9113	1.30657	55.25	27.1364
KLHL21	1	93	83	111.661	85.4618	1.30656	65.9338	108.258
MRPS6	21	258	216	225.635	172.735	1.30625	156.424	221.757
Hs.495112	14	16	19	37.7334	28.8885	1.30617	61.1659	38.7803
NKX2-2	20	99	89	212.122	162.41	1.30609	79.8455	85.7915
Hs.407582	5	16	9	15.8555	12.1415	1.30589	35.8379	50.2333
SAMD4A	14	256	239	144.25	110.462	1.30588	198.767	204.416
Hs.578915	16	16	17	38.7658	29.686	1.30586	52.5924	25.9582
TMEM235	17	16	13	176.466	135.159	1.30562	51.2283	67.6445
Hs.544906	7	16	17	29.1947	22.3612	1.3056	74.6176	39.993
MLLT1	19	139	115	104.979	80.4104	1.30554	156.773	164.876
Hs.232535	10	16	17	29.422	22.5405	1.3053	69.9166	39.0499
FTL	19	174	158	4692.07	3595.22	1.30508	59.3328	74.8065
Hs.551253	7	16	17	52.8421	40.493	1.30497	36.5077	31.757
Hs.162195	1	40	24	33.9775	26.0392	1.30486	34.3695	16.8459
Hs.542167	2	16	17	35.9678	27.5656	1.30481	44.117	39.372
HEPACAM	11	44	46	1111.79	852.097	1.30477	84.9068	102.645
Hs.172028	15	71	62	360.635	276.428	1.30462	53.3406	61.4177
Hs.249545	15	16	17	23.4203	17.9537	1.30448	60.6009	32.3174
Hs.636112	17	40	24	104.88	80.4003	1.30447	71.2272	75.2318
DHCR24	1	99	89	330.834	253.625	1.30442	83.5285	92.5676
DENND6A	3	44	44	78.8864	60.4826	1.30428	68.4495	67.2315
SERF2	15	179	139	906.541	695.059	1.30426	105.775	103.914
GPR146	7	68	51	71.5368	54.853	1.30415	54.8705	43.5215
LOC100289230	5	40	24	48.6861	37.3367	1.30397	37.715	16.2154
Hs.542803	3	16	17	47.6467	36.5422	1.30388	41.795	42.6676
PTP4A2	1	362	334	865.709	664.099	1.30358	124.035	200.021
CLEC2B	12	115	98	55.0077	42.1976	1.30358	70.7294	65.0491
ZNF664	12	116	78	522.911	401.192	1.30339	120.052	121.482
Hs.583671	8	16	17	36.825	28.2538	1.30337	56.9829	43.3406
FOLR3	11	99	89	21.8191	16.7426	1.30321	213.515	56.432
KCNJ2	17	99	89	231.797	177.897	1.30298	69.5364	92.365
VEGFA	6	326	293	68.6497	52.6877	1.30295	140.878	86.4051
LHFPL3	7	68	53	129.598	99.4652	1.30295	104.842	89.7473
Hs.731620	16	40	24	92.2027	70.7719	1.30282	44.6952	33.1842
Hs.544631	6	16	17	24.8912	19.1063	1.30278	44.5599	47.0069
OIP5-AS1	15	80	50	127.871	98.1576	1.30271	134.738	87.0573
Hs.565912	3	16	17	21.1192	16.2141	1.30252	43.3382	20.3924
Hs.576763	10	16	17	26.88	20.6391	1.30238	71.9523	41.7788
Hs.547576	20	40	24	86.455	66.393	1.30217	38.1008	14.9517
RALGDS	9	190	173	407.007	312.577	1.3021	146.911	166.115
UNC5B	10	214	180	139.331	107.054	1.30151	124.569	96.0337
RPL32	3	159	148	1588.48	1220.51	1.30148	112.836	117.935
CD68	17	131	123	154.089	118.4	1.30142	145.471	137.232
IFITM3	11	99	89	1160.32	891.578	1.30142	50.9019	61.3613
Hs.565628	20	16	17	33.4331	25.6936	1.30122	69.3758	49.4491
RBM17	10	219	161	247.059	189.889	1.30107	94.4267	103.999
Hs.707173	2	65	56	365.62	281.039	1.30096	71.3067	78.1466
HSPA5	9	133	107	352.948	271.345	1.30074	98.9831	101.341
USP21	1	223	181	77.8588	59.8579	1.30073	54.9458	50.1033
LOC100129447	12	16	11	30.124	23.1602	1.30068	21.8897	40.8439
SPATA13	13	84	66	271.116	208.479	1.30045	84.6	108.935
TUBB4A	19	99	89	653.561	502.589	1.30039	91.1832	93.8164
MED11	17	68	51	85.733	65.9299	1.30037	63.5151	63.6539
Hs.644297	2	65	56	41.2117	31.6958	1.30023	44.3599	50.3872
Hs.80714	17	40	24	262.091	201.627	1.29988	55.5709	44.8265
Hs.584170	9	16	17	39.9564	30.7395	1.29984	54.5355	39.5717
Hs.658440	8	40	24	54.3105	41.7847	1.29977	36.6747	32.9137
XRCC2	7	115	106	115.937	89.2083	1.29962	213.688	180.123
Hs.680100	10	16	9	15.3895	11.8422	1.29955	38.5147	62.6663
GAS7	17	431	380	172.801	133	1.29925	159.844	145.678
GATC	12	133	107	73.6029	56.6542	1.29916	99.9187	108.986
BST2	19	99	91	91.7825	70.6647	1.29884	87.9545	110.288
Hs.578064	13	16	17	21.1412	16.2775	1.29879	53.2186	31.5002
PDIA4	7	164	145	90.8711	69.9919	1.29831	61.4974	61.7451
CALD1	7	684	577	110.766	85.3175	1.29828	362.084	219.621
Hs.573871	10	16	17	40.8558	31.4695	1.29827	58.4352	47.4989
FNIP2	4	152	100	213.864	164.742	1.29818	54.4138	73.2071
RGS8	1	108	75	105.624	81.3694	1.29808	282.032	148.279
NASP	1	232	194	87.9132	67.7294	1.29801	88.0483	78.6514
Hs.676018	13	16	9	130.596	100.616	1.29796	86.1373	55.2695
FBXW12	3	125	111	103.65	79.8627	1.29785	153.622	134.406
Hs.444718	2	40	24	118.429	91.2522	1.29782	51.7055	32.4851
AFTPH	2	165	143	173.763	133.913	1.29758	66.6623	67.144
JDP2	14	108	75	185.891	143.309	1.29714	145.367	132.362
Hs.639513	11	16	9	36.377	28.0455	1.29707	33.7574	30.1667
PTGDS	9	229	203	2879.91	2220.73	1.29683	76.0098	104.233
LRRC1	6	202	185	67.2607	51.8963	1.29606	110.401	106.916
LOC100506317	2	16	17	19.7839	15.2655	1.29599	83.2632	29.3772
Hs.541076	18	16	17	37.7629	29.1399	1.29592	69.0588	66.522
PVALB	22	99	89	259.409	200.209	1.29569	197.706	126.683
Hs.623723	6	16	17	19.5613	15.0978	1.29564	41.8107	33.9687
ELK4	1	425	351	32.7242	25.2614	1.29542	122.135	109.195
Hs.662783	1	40	24	77.932	60.1649	1.29531	66.6965	60.4534
ARHGAP21	10	108	79	1000.64	772.51	1.2953	78.3985	82.7198
RPS6	9	334	291	2145.26	1656.22	1.29528	81.6958	106.105
TXNIP	1	164	145	519.275	400.902	1.29527	90.2961	104.299
Hs.550967	2	16	17	25.5843	19.7533	1.29519	56.6725	37.0556
Hs.592057	16	40	24	346.638	267.656	1.29509	36.2086	33.8578
LOC440602	1	16	11	18.7297	14.4631	1.295	31.5851	47.5461
MSL2	3	109	100	48.6094	37.5573	1.29427	98.0282	72.1713
FRMD8	11	165	127	46.4214	35.8708	1.29413	102.928	79.0876
TEP1	14	139	113	27.8569	21.5288	1.29393	75.5318	66.3738
SMNDC1	10	123	106	140.009	108.209	1.29387	63.9722	63.7121
PTAR1	9	120	78	110.581	85.4734	1.29374	87.1598	91.2696
PIP4K2A	10	220	188	959.094	741.426	1.29358	126.191	139.196
PABPC1	8	196	171	537.534	415.541	1.29358	75.0651	83.3598
CASC3	17	93	83	307.065	237.411	1.29339	39.7872	47.5746
Hs.659586	3	56	33	95.9922	74.2338	1.29311	70.1154	57.3432
HP1BP3	1	235	172	363.952	281.481	1.29299	131.689	152.039
Hs.124421	5	16	17	30.6948	23.7414	1.29288	44.4244	27.1342
BCYRN1	2	16	17	8405.07	6501.36	1.29282	33.4967	35.5731
Hs.661111	20	40	24	56.9835	44.0829	1.29264	70.2401	44.8129
SEPT8	5	186	159	494.213	382.382	1.29246	94.5062	114.884
Hs.560946	2	16	17	25.8572	20.0079	1.29235	43.5668	39.9239
Hs.565311	2	16	17	46.0162	35.6092	1.29226	60.3006	44.9017
LOC645262	1	16	19	35.3446	27.3512	1.29225	55.0632	46.867
RMND5A	2	223	199	58.0088	44.8907	1.29222	139.003	107.864
Hs.683429	2	16	9	25.5356	19.7625	1.29213	21.2276	28.2135
MGST1	12	220	166	748.731	579.485	1.29206	157.718	150.322
LINC00847	5	16	11	95.63	74.0149	1.29204	27.8707	38.441
SLC39A11	17	68	51	166.669	129.022	1.29178	42.4529	43.9127
ABHD17A	19	109	106	240.939	186.524	1.29173	98.9688	140.236
Hs.655397	4	40	24	49.557	38.3682	1.29162	76.7951	73.1649
Hs.670477	4	40	24	31.765	24.5951	1.29152	55.1651	33.9265
AMY2B	1	84	66	82.8733	64.1746	1.29137	80.3203	73.8077
Hs.277346	16	16	17	47.4411	36.7381	1.29133	62.6688	47.7329
NFAT5	16	236	203	131.986	102.272	1.29055	163.131	164.406
RNF146	6	149	124	229.444	177.839	1.29017	128.016	139.445
Hs.607003	17	16	9	20.9927	16.2734	1.29	30.2103	38.0435
Hs.582126	5	16	17	38.4387	29.7999	1.28989	49.6532	39.1788
ZNF692	1	93	85	93.4016	72.4164	1.28979	52.6123	52.9873
Hs.583158	7	16	17	44.5375	34.5335	1.28969	42.5081	57.9555
ACSL1	4	170	151	248.486	192.671	1.28969	90.342	153.591
LRRC8D	1	93	83	274.897	213.198	1.2894	46.1263	51.7224
Hs.735010	20	16	17	28.656	22.2279	1.28919	45.0297	29.4042
TUBD1	17	204	169	39.2039	30.416	1.28892	92.4676	64.7006
Hs.539139	12	16	17	28.2973	21.9549	1.28888	79.1911	28.6909
RPL13	16	441	368	946.368	734.291	1.28882	105.627	110.671
Hs.560817	2	16	17	44.2474	34.332	1.28881	45.4101	24.8718
TOB2	22	198	163	83.8742	65.0888	1.28861	90.4243	109.181
MAP4K5	14	245	218	87.3029	67.7509	1.28859	94.2907	98.0843
Hs.586413	8	16	17	24.0549	18.6685	1.28853	69.4238	48.8614
Hs.660353	6	40	24	39.0017	30.2692	1.2885	77.7615	60.8632
HERPUD1	16	109	100	277.314	215.234	1.28843	51.2848	59.0206
Hs.712810	11	40	24	180.522	140.119	1.28835	39.015	27.2433
LAMP1	13	229	201	1140.27	885.141	1.28823	108.764	110.692
Hs.538554	10	16	17	73.4981	57.0607	1.28807	57.0645	37.346
Hs.542430	20	16	17	28.3491	22.0105	1.28798	57.6955	40.57
Hs.731879	14	40	24	207.094	160.807	1.28784	35.7706	25.678
ZNF302	19	211	173	162.714	126.36	1.2877	103.878	133.135
C7orf55	7	124	92	204.073	158.488	1.28763	104.568	82.9556
Hs.207543	3	16	17	27.9653	21.7185	1.28762	30.6714	34.9302
Hs.665862	4	40	24	36.2844	28.1796	1.28761	42.0089	17.7709
Hs.633449	9	40	24	55.7645	43.31	1.28757	51.1504	35.5991
Hs.127346	12	40	24	23.1094	17.95	1.28743	52.5768	34.3105
Hs.660733	1	65	56	58.9073	45.7617	1.28726	83.7775	60.6004
Hs.598881	8	40	24	49.9792	38.8328	1.28703	74.9527	69.0538
Hs.640508	12	16	17	33.3399	25.9055	1.28698	56.3958	48.7225
Hs.566922	8	16	17	22.703	17.6414	1.28692	69.1195	36.5935
Hs.446623	19	65	56	81.4564	63.2985	1.28686	74.2472	93.649
Hs.655477	4	40	24	171.037	132.923	1.28673	45.4416	42.1768
FUNDC2	23	108	77	328.436	255.349	1.28622	122.396	132.172
HSPA2	14	115	106	1108.71	862.081	1.28608	55.0384	64.5614
ZNF862	7	121	99	80.3266	62.463	1.28599	62.8992	67.5497
Hs.655314	8	40	24	374.815	291.5	1.28581	29.1875	17.3385
NUDCD2	5	140	101	112.138	87.2246	1.28562	117.198	103.451
ELAVL3	19	171	139	390.606	303.828	1.28562	128.662	134.315
Hs.648488	7	16	17	32.8553	25.5573	1.28555	63.0502	44.9871
Hs.164147	6	16	17	23.4515	18.2428	1.28552	48.6447	33.6393
TBC1D23	3	68	51	136.968	106.549	1.2855	76.7822	83.8917
Hs.655961	15	40	24	29.5075	22.9569	1.28534	87.8827	77.6536
Hs.734120	10	16	9	56.8705	44.2471	1.28529	33.5621	30.5568
Hs.209381	2	16	17	23.2721	18.1084	1.28515	49.5664	30.7461
FOXN2	2	139	115	236.863	184.324	1.28503	101.516	119.746
Hs.737745	8	16	17	39.2155	30.5224	1.28481	57.4168	33.0462
Hs.558293	23	16	17	36.6419	28.5214	1.28472	70.6767	43.3064
Hs.600936	4	16	17	67.0705	52.2128	1.28456	39.3398	36.4776
COL27A1	9	164	112	70.0252	54.5181	1.28444	106.53	94.2189
Hs.584269	9	16	17	21.9672	17.1031	1.2844	49.5898	39.318
AMOTL2	3	99	89	127.131	98.9838	1.28436	78.5084	77.3223
DBNDD2	20	109	100	2720.97	2118.56	1.28435	111.036	133.75
ZNF665	19	93	83	69.0913	53.7974	1.28429	89.9238	91.8865
S100A12	1	99	91	43.0913	33.5591	1.28404	83.3443	82.7794
HIST1H1C	6	99	89	84.8627	66.0907	1.28404	96.3673	109.967
RPL24	3	188	162	2043.36	1591.4	1.284	51.6558	62.3372
Hs.660949	3	40	24	18.3137	14.2647	1.28385	70.079	57.4338
HEPN1	11	40	28	1178.35	917.901	1.28375	32.9282	57.6611
SLC25A29	14	164	116	132.812	103.464	1.28365	72.3408	65.7063
Hs.539904	14	16	17	22.444	17.488	1.28339	59.2993	39.5804
CHD8	14	93	83	171.784	133.855	1.28336	99.5227	89.8813
SHROOM1	5	148	99	163.592	127.478	1.28329	96.0106	94.0557
Hs.276976	23	40	24	106.946	83.337	1.28329	34.3917	41.5987
Hs.438801	5	40	24	31.3409	24.4225	1.28328	208.898	51.5272
Hs.679090	13	16	9	42.1035	32.8128	1.28314	47.0472	16.6123
B3GNT9	16	68	51	85.3091	66.4994	1.28286	90.4731	91.6131
Hs.536411	15	40	24	105.805	82.4781	1.28283	49.6071	48.0563
C1orf198	1	68	51	924.42	720.627	1.2828	53.067	59.4045
Hs.673633	15	16	9	59.8638	46.6737	1.2826	19.4514	20.9506
Hs.563592	9	16	17	36.3533	28.3492	1.28234	59.5938	50.0273
Hs.545460	8	16	17	27.9037	21.7601	1.28233	41.8043	42.9736
SMOC1	14	124	94	156.852	122.319	1.28231	114.614	101.69
Hs.608901	7	40	24	160.911	125.49	1.28226	78.3816	82.2844
HLA-DRA	6	180	162	408.89	318.933	1.28205	127.268	109.942
SHISA6	17	68	53	183.845	143.4	1.28204	118.91	128.215
TPRN	9	68	51	132.205	103.127	1.28196	60.5102	58.4503
ENPP5	6	108	75	222.944	173.922	1.28187	110.288	65.8108
Hs.683274	12	40	24	99.2314	77.414	1.28183	35.5202	30.4944
NLN	5	268	171	140.601	109.698	1.28171	169.686	157.093
BMI1	10	99	91	381.295	297.602	1.28122	60.0161	103.91
Hs.537809	1	16	17	35.9005	28.0284	1.28086	39.7747	33.9547
Hs.46506	13	56	41	222.949	174.063	1.28085	53.2402	56.4203
EIF1	17	464	393	1453.65	1134.93	1.28082	83.1795	126.326
TP53INP2	20	68	51	1750.78	1367.08	1.28067	59.4568	70.6959
RPLP2	11	229	201	901.568	703.998	1.28064	156.668	173.349
KSR1	17	263	221	52.4443	40.9522	1.28062	167.071	148.11
UBC	12	178	169	4071.9	3180.87	1.28012	81.7687	99.0788
AC091878.1	5	28	25	36.0012	28.1247	1.28006	62.872	58.7369
Hs.160599	12	16	17	29.5815	23.1118	1.27993	47.571	40.5863
SNAP23	15	297	250	67.8873	53.0448	1.27981	123.692	114.837
FAM120C	23	149	126	89.4802	69.9438	1.27932	134.807	140.511
Hs.658368	11	40	24	40.9001	31.9704	1.27931	66.5092	60.9226
Hs.663667	8	16	9	17.2526	13.4878	1.27912	33.3099	40.5118
MFSD11	17	133	107	174.347	136.318	1.27898	164.063	134.893
SIRT2	19	131	117	265.566	207.654	1.27888	72.1735	77.1777
HLA-B	6	229	205	547.694	428.279	1.27883	77.386	92.326
KIAA0930	22	242	205	206.975	161.852	1.27879	114.694	121.557
ADPGK-AS1	15	16	17	26.3994	20.6446	1.27876	48.9211	46.6071
Hs.514958	18	16	17	34.6558	27.103	1.27867	31.9169	29.3633
LOC100133039	3	16	11	37.41	29.2582	1.27862	29.2327	29.1441
MPP5	14	139	113	158.022	123.602	1.27847	98.6844	96.7928
Hs.658890	8	40	24	68.4274	53.5258	1.2784	34.0728	22.9252
Hs.670421	5	40	24	90.4399	70.7538	1.27823	38.7569	25.0544
Hs.669500	11	40	24	32.0526	25.0788	1.27807	70.0234	25.275
MSL1	17	145	108	153.662	120.233	1.27804	104.489	82.1271
Hs.710981	10	16	9	22.2306	17.3952	1.27798	41.6481	39.4384
SDIM1	6	16	17	54.4993	42.6456	1.27796	45.247	36.3236
KTN1	14	245	218	388.527	304.036	1.2779	90.0446	116.029
PKD2	4	115	106	82.6298	64.6626	1.27786	55.2878	55.2216
ENHO	9	68	53	561.941	439.756	1.27785	86.6542	69.1892
Hs.120287	12	16	17	39.1903	30.673	1.27768	41.2361	52.4496
FBXW4	10	99	89	244.425	191.319	1.27758	51.5173	60.3757
Hs.624222	23	16	17	81.6096	63.8814	1.27752	75.0405	46.5972
ARPC1B	7	87	81	114.319	89.4855	1.27751	57.5114	60.6039
STAG2	23	261	241	155.074	121.393	1.27746	95.7789	156.953
TMEM251	14	65	58	51.7044	40.4746	1.27745	58.8447	71.5459
Hs.519124	4	16	17	38.1646	29.8767	1.2774	59.9559	38.637
Hs.650727	14	16	17	61.5988	48.2264	1.27728	40.9324	41.2337
Hs.539985	14	16	17	30.0905	23.5583	1.27728	38.1694	34.0766
Hs.656771	16	40	24	50.9099	39.8618	1.27716	78.8131	49.7154
GABPB2	1	44	44	1845.86	1445.35	1.2771	144.721	133.465
RICTOR	5	124	84	234.06	183.28	1.27706	63.3265	68.4509
SF3B1	2	338	299	308.934	241.917	1.27703	109.332	102.606
ITPK1	14	229	203	205.264	160.751	1.27691	120.748	115.941
SGK494	17	100	79	47.0477	36.8522	1.27666	60.1207	51.955
Hs.539865	14	16	17	23.6936	18.5596	1.27662	50.7555	36.2899
SPTLC2	14	334	281	72.1951	56.5592	1.27645	117.273	137.513
CLIP4	2	133	111	185.158	145.06	1.27642	128.036	167.097
Hs.654707	10	56	33	84.8229	66.458	1.27634	58.9303	71.5543
EVI2B	17	109	100	71.6179	56.1126	1.27632	86.5161	75.0229
Hs.565315	2	16	17	19.8682	15.5674	1.27627	53.2937	40.8323
Hs.583506	7	16	17	40.7409	31.9274	1.27605	31.2964	37.5476
Hs.538769	11	16	17	19.0091	14.8982	1.27593	52.412	44.1072
RAB33B	4	93	83	91.0651	71.3715	1.27593	70.9983	68.5755
CTDNEP1	17	123	106	165.887	130.024	1.27583	77.1396	77.388
Hs.612925	16	16	9	19.4659	15.2587	1.27572	39.8786	50.818
CEBPB	20	99	89	466.606	365.764	1.2757	64.6979	64.0652
TRNAR1	17	16	17	31.0664	24.3575	1.27544	58.7356	37.3428
Hs.137641	11	16	17	29.2584	22.9412	1.27537	55.8809	37.7316
Hs.613677	16	40	24	38.3689	30.0914	1.27508	42.0753	14.6027
FAM19A5	22	148	101	279.995	219.606	1.27499	79.6382	88.3185
Hs.197962	5	80	48	62.3469	48.9006	1.27497	80.6017	75.3716
Hs.712612	2	40	24	31.3295	24.5739	1.27491	68.1343	44.5897
Hs.540752	17	16	17	32.1689	25.2339	1.27483	38.7301	43.8547
CDK5RAP3	17	143	131	205.949	161.551	1.27482	62.2801	65.8914
Hs.641692	1	16	17	89.2164	69.984	1.27481	33.0294	41.6648
SNORD15B	11	16	17	47.06	36.9215	1.2746	38.3296	48.8272
Hs.731443	8	40	24	212.776	166.988	1.2742	21.0936	21.8888
Hs.542103	2	16	17	43.4174	34.0749	1.27418	62.5543	60.8557
Hs.660241	1	40	24	38.1886	29.9729	1.2741	41.8871	29.0498
FAM195A	16	84	62	134.715	105.77	1.27367	62.8848	48.9086
Hs.663897	5	40	24	233.765	183.543	1.27362	33.39	35.8379
Hs.42279	10	16	17	34.2424	26.886	1.27361	64.8015	40.6354
CDK11A	1	288	259	50.6684	39.7836	1.2736	120.558	98.9572
LAMP2	23	361	322	588.374	461.979	1.2736	77.1746	91.3459
Hs.616548	13	16	9	19.6414	15.4239	1.27344	26.8404	39.516
Hs.658906	2	40	24	95.2167	74.7775	1.27333	23.7538	22.7172
MBP	18	449	354	2180.41	1712.53	1.27321	156.699	156.378
RN7SL1	14	16	19	7445.37	5847.76	1.2732	31.1457	41.9094
YOD1	1	149	124	67.4945	53.0229	1.27293	99.2719	97.9017
Hs.563654	23	16	17	37.1093	29.1526	1.27293	43.0938	38.4409
FLT1	13	309	249	102.3	80.3679	1.2729	105.435	145.236
Hs.570617	3	16	17	61.5885	48.3867	1.27284	61.5737	54.419
OST4	2	40	26	863.122	678.192	1.27268	47.8994	48.1875
Hs.605133	12	40	24	192.131	150.971	1.27264	39.9146	34.9875
Hs.539634	13	16	17	47.2384	37.1212	1.27255	63.8177	67.4558
BTBD1	15	115	106	214.859	168.843	1.27254	82.9079	80.7385
MRO	18	164	118	207.334	162.94	1.27245	177.473	150.646
RPS13	11	123	104	2451.6	1926.8	1.27237	62.2506	66.2439
ZNF704	8	260	173	91.174	71.6596	1.27232	117.802	100.756
Hs.551459	20	16	17	26.5103	20.8382	1.2722	59.6754	36.682
MBD3	19	164	145	103.904	81.6759	1.27215	83.462	71.5298
PRTFDC1	10	68	55	192.489	151.314	1.27212	53.4293	57.2365
Hs.584342	9	16	17	20.9726	16.4866	1.2721	54.5298	44.8813
CLU	8	289	252	1445.28	1136.34	1.27187	135.042	163.936
Hs.541248	19	16	17	25.9985	20.4426	1.27178	43.429	45.085
XAF1	17	195	156	75.0338	59.0002	1.27176	111.121	94.9236
ARHGEF39	9	152	119	56.4357	44.3787	1.27168	162.105	143.562
MYLK	3	215	175	429.673	337.898	1.27161	112.826	115.857
Hs.538645	10	16	17	41.8439	32.9075	1.27156	47.1787	43.5007
CCNG1	5	115	108	184.228	144.891	1.2715	66.4789	69.9102
Hs.543114	3	16	17	23.5746	18.5425	1.27138	37.7259	39.2492
ZNF83	19	99	91	91.0124	71.5965	1.27119	88.4228	93.2133
Hs.566176	4	16	17	14.75	11.6044	1.27106	50.126	26.3531
THBS2	6	99	91	295.913	232.894	1.27059	57.9691	65.524
TYROBP	19	99	89	193.894	152.608	1.27054	95.5072	98.9122
Hs.661767	12	40	24	49.0755	38.6274	1.27049	33.8634	28.7888
Hs.550384	2	16	17	23.7188	18.6699	1.27043	42.1885	30.9774
PABPN1	14	229	201	210.798	165.932	1.27039	107.98	102.652
Hs.649917	5	16	17	19.5227	15.3693	1.27024	35.3215	17.8798
CLDN5	22	99	89	347.499	273.573	1.27023	87.211	95.1978
RPS16	19	244	193	2568.82	2022.71	1.26999	108.813	106.765
CD14	5	115	106	367.831	289.642	1.26995	176.005	148.492
Hs.436592	23	16	17	28.0675	22.1018	1.26992	50.6006	37.6379
WDR81	17	68	51	99.4464	78.3187	1.26977	77.1167	83.5175
Hs.540514	16	16	17	28.7681	22.6566	1.26974	48.4025	27.7244
Hs.432566	3	105	80	43.7844	34.4853	1.26965	139.498	104.957
MPZ	1	99	91	35.7717	28.1744	1.26965	182.892	111.72
PSMD6-AS2	3	56	41	45.8713	36.1354	1.26943	37.4969	35.1841
Hs.652627	17	16	17	45.3617	35.7347	1.2694	51.4966	64.1167
Hs.579531	18	16	17	41.5608	32.7426	1.26932	45.9652	50.5731
CHKA	11	228	213	107.353	84.5805	1.26925	106.295	108.435
Hs.543470	4	16	17	66.364	52.2906	1.26914	34.6211	24.3677
Hs.405427	1	40	24	191.353	150.775	1.26913	34.6536	33.8567
Hs.541707	2	16	17	25.1174	19.7923	1.26905	49.1577	44.8384
BIN1	2	375	330	461.848	363.941	1.26902	88.0291	104.965
Hs.125424	7	16	17	27.3637	21.5644	1.26893	77.1026	51.7545
OGT	23	431	371	113.882	89.7559	1.2688	170.361	142.431
NUBPL	14	93	83	164.253	129.467	1.26869	218.26	171.001
HADHB	2	87	81	847.87	668.353	1.2686	70.5701	67.6407
Hs.569389	14	16	17	27.6316	21.7821	1.26855	55.1188	47.736
HNRNPF	10	99	89	46.4322	36.6056	1.26844	69.0603	67.7111
RAB28	4	167	142	119.357	94.1012	1.26839	105.05	108.025
ZCRB1	12	108	77	736.453	580.62	1.26839	66.142	77.6729
PHC3	3	254	204	67.3897	53.132	1.26834	174.614	172.981
MTRR	5	208	189	108.674	85.6906	1.26822	101.844	94.1569
SORL1	11	220	186	596.291	470.221	1.26811	114.983	72.2504
KDM3A	2	93	83	111.012	87.5423	1.26809	57.2554	62.614
RGCC	13	173	131	662.364	522.425	1.26787	123.637	125.964
S100A9	1	99	89	119.85	94.5361	1.26777	303.538	267.321
HNRNPH1	5	310	274	279.784	220.71	1.26765	140.221	181.757
LOC729973	1	16	17	21.7079	17.1257	1.26756	47.9091	37.3999
SON	21	454	405	233.18	183.966	1.26752	130.874	123.15
FGL2	7	139	113	95.4335	75.3014	1.26735	118.869	108.927
Hs.708005	16	40	24	572.59	451.817	1.2673	21.439	22.1812
RAP1A	1	159	132	151.115	119.247	1.26725	130.99	122.512
LOC100131023	11	16	19	62.8599	49.6094	1.2671	26.4142	25.9762
Hs.574767	2	16	17	38.0013	29.9915	1.26707	68.163	51.1714
SETD7	4	108	77	263.591	208.037	1.26704	136.004	144.675
Hs.709640	1	40	24	38.7678	30.5976	1.26702	69.3355	49.2705
Hs.662110	18	40	24	48.0702	37.9402	1.267	105.169	92.9015
RPL36A	23	270	238	407.266	321.446	1.26698	151.101	151.033
DLGAP4	20	323	270	65.929	52.0367	1.26697	146.7	121.994
Hs.657968	5	40	24	98.9169	78.0864	1.26676	49.0463	42.1847
Hs.543938	5	16	17	50.1574	39.5952	1.26676	33.8114	24.3479
MIR31HG	9	16	11	25.1936	19.8909	1.26659	22.5089	41.6887
EEF1D	8	326	291	366.56	289.446	1.26642	119.021	134.373
Hs.654950	8	40	24	56.6617	44.7449	1.26633	56.365	55.0263
TAB2	6	174	158	99.6854	78.7279	1.2662	72.4587	78.2114
RPS25	11	123	104	3610.51	2851.87	1.26601	62.8181	70.252
DDX59	1	192	141	99.8516	78.8788	1.26589	93.5152	90.6594
Hs.657664	9	40	24	111.808	88.3269	1.26584	24.7476	18.2364
SAFB2	19	174	156	115.705	91.4104	1.26577	81.772	80.1434
TMEM98	17	84	68	387.512	306.19	1.26559	71.3498	92.568
Hs.545705	9	16	17	21.3832	16.897	1.2655	46.7785	54.3718
HHLA3	1	211	171	57.0573	45.088	1.26547	107.626	104.934
ACIN1	14	93	83	90.9402	71.8642	1.26545	64.2677	73.0574
Hs.713983	2	40	24	96.3115	76.1111	1.26541	36.6623	39.4477
PKP4	2	310	278	455.907	360.32	1.26528	118.005	129.051
Hs.648469	2	16	17	29.1923	23.0751	1.2651	61.6435	43.386
MSGN1	2	16	19	18.5919	14.6971	1.265	39.3799	36.1806
Hs.657311	13	40	24	53.2851	42.124	1.26496	35.0537	18.5943
Hs.712977	5	65	56	49.6916	39.2952	1.26457	81.0357	79.964
LMOD3	3	100	71	199	157.385	1.26441	202.497	164.392
Hs.171377	3	16	17	29.4139	23.2663	1.26423	56.6424	52.4472
Hs.737697	3	16	17	55.0654	43.5583	1.26418	50.1323	29.7767
Hs.334181	21	16	9	13.8044	10.9217	1.26394	27.3649	58.0303
GUCY1A2	11	323	253	49.375	39.0647	1.26393	115.691	96.5433
Hs.687430	4	16	9	51.1346	40.4612	1.26379	26.4045	19.8714
Hs.601035	1	16	9	17.428	13.7905	1.26377	32.9542	29.1246
RASA4	7	164	151	32.9995	26.1124	1.26375	76.3625	64.8635
SLC27A1	19	68	53	259.734	205.535	1.2637	54.9739	48.8249
Hs.540171	15	16	17	27.7532	21.9624	1.26366	64.5443	25.3002
TEF	22	204	169	72.2884	57.2124	1.26351	138.885	144.007
RPL21	13	241	224	1601.19	1267.54	1.26322	156.671	213.888
EXOC3L2	19	44	36	37.9374	30.0329	1.26319	101.074	84.0454
Hs.737993	11	16	9	55.9034	44.2572	1.26315	39.0943	21.0787
Hs.232517	23	16	17	43.0076	34.0512	1.26303	54.6002	37.6536
ENPP2	8	180	162	1053.84	834.474	1.26288	64.7188	71.715
ZNF292	6	162	142	76.7789	60.7988	1.26284	132.454	137.863
YWHAQ	2	93	85	1369.66	1084.6	1.26282	74.1085	61.9459
IFRD1	7	232	194	114.013	90.2923	1.26271	118.192	134.307
Hs.571519	8	16	17	25.4049	20.1207	1.26262	42.9144	26.2984
Hs.649447	7	16	17	24.67	19.5419	1.26241	40.5813	35.8032
Hs.544197	5	16	17	27.2974	21.6238	1.26238	46.3031	54.61
NNMT	11	204	169	29.0194	22.9891	1.26231	278.986	76.1673
Hs.650028	5	16	17	44.829	35.5137	1.2623	47.2069	39.2406
Hs.538339	10	16	17	31.0458	24.5955	1.26225	43.9057	39.4738
Hs.545479	8	16	17	31.3526	24.8394	1.26221	61.0792	30.4235
Hs.564393	12	16	17	26.6901	21.1466	1.26215	47.212	41.7229
Hs.640502	13	16	17	23.4516	18.5828	1.26201	60.2611	36.2088
Hs.655421	2	16	9	140.712	111.5	1.26199	36.9544	39.5851
Hs.537779	1	16	17	43.4049	34.3991	1.2618	31.8508	35.5712
PLEKHB1	11	179	137	1295.91	1027.25	1.26154	103.416	99.2751
Hs.544133	5	16	17	22.9495	18.1918	1.26153	52.0383	33.3224
Hs.659578	13	40	24	59.9877	47.557	1.26139	94.5503	100.568
RPL31	2	340	291	776.101	615.288	1.26136	184.161	184.146
PDP1	8	139	113	73.6895	58.4263	1.26124	130.481	112.733
Hs.660513	3	16	9	40.2133	31.8861	1.26116	14.6263	14.8871
LOC100287728	23	16	17	17.3224	13.7364	1.26106	55.767	27.0306
Hs.664068	2	40	24	77.1803	61.2091	1.26093	92.3571	95.3994
ZNF397	18	188	125	50.0261	39.6796	1.26075	118.849	92.4867
Hs.131310	21	16	17	33.1591	26.3011	1.26075	65.6205	52.3412
Hs.557909	10	16	17	30.7326	24.386	1.26025	42.569	46.2105
Hs.543854	5	16	17	34.352	27.2584	1.26024	47.5071	51.1547
Hs.471011	2	56	41	116.165	92.1855	1.26013	47.9179	50.7152
PYGO2	1	108	77	93.4844	74.1933	1.26001	99.5547	101.317
Hs.663957	5	40	24	52.0564	41.3198	1.25984	25.1081	16.2754
DRGX	10	16	21	35.6154	28.2746	1.25962	48.6549	40.6704
Hs.544881	7	16	17	22.3967	17.7805	1.25962	37.6508	32.2283
CDC42SE1	1	235	178	101.613	80.6734	1.25956	70.274	61.7395
Hs.564162	10	16	17	21.85	17.3479	1.25952	57.8262	36.7269
LPAR1	9	257	226	584.979	464.449	1.25951	104.024	116.912
ELOF1	19	68	51	176.766	140.346	1.2595	73.8631	76.4274
SNHG6	8	40	26	2385.44	1894.05	1.25944	35.0947	39.4681
SSFA2	2	179	137	170.663	135.528	1.25925	109.059	83.6642
FZD7	2	180	162	44.2787	35.1659	1.25914	170.524	115.088
Hs.661380	9	40	24	103.756	82.4169	1.25891	27.8505	38.1994
SAMHD1	20	165	127	73.4394	58.3418	1.25878	101.157	93.2084
Hs.444464	2	16	17	24.4299	19.4082	1.25874	32.0513	39.2026
PCED1A	20	108	77	77.4393	61.532	1.25852	72.4528	61.1491
Hs.191230	15	16	17	40.0127	31.7943	1.25849	43.6296	43.0139
ZNF768	16	93	83	44.4079	35.2949	1.2582	55.2357	46.3763
GABRB2	5	171	139	97.0484	77.1351	1.25816	194.902	167.478
Hs.645845	2	40	24	80.4939	63.978	1.25815	43.1894	25.5392
FOXO3	6	409	336	200.72	159.546	1.25807	128.81	138.638
HOXD-AS1	2	120	74	94.6164	75.2121	1.25799	116.587	97.6372
RASA2	3	139	113	42.9385	34.1349	1.25791	102.41	92.2389
LOC642361	10	72	60	102.981	81.8697	1.25786	59.0842	61.8275
Hs.657512	1	16	9	22.653	18.0102	1.25779	24.1267	13.6495
MIR1244-1	12	65	56	937.569	745.511	1.25762	63.1555	69.6606
Hs.612374	4	40	24	95.6188	76.0356	1.25755	52.8853	36.6076
Hs.209901	10	16	17	26.1111	20.7661	1.25739	52.4322	27.3824
CEBPA	19	99	89	95.3715	75.8512	1.25735	71.3628	87.9885
Hs.441354	14	16	17	18.5626	14.7634	1.25734	52.7114	33.1284
Hs.498432	1	16	17	29.4336	23.4098	1.25732	38.964	18.8142
Hs.544896	7	16	17	24.6928	19.6394	1.25731	50.655	32.9131
SNAR-A1	19	16	17	1090.68	867.528	1.25723	67.5868	77.9651
Hs.539131	12	16	17	32.2673	25.6667	1.25717	47.2486	31.3464
COL18A1	21	192	170	63.4292	50.4556	1.25713	94.2574	83.0686
Hs.520751	7	16	9	50.4656	40.1479	1.25699	41.345	44.0477
RHOBTB3	5	368	299	310.89	247.372	1.25677	150.409	162.572
Hs.402144	3	16	17	46.3149	36.8646	1.25635	46.4222	29.4622
KLK6	19	115	108	443.633	353.128	1.25629	81.638	101.954
TAF3	10	72	60	55.577	44.2391	1.25629	57.3733	50.8209
Hs.508986	14	16	17	27.2557	21.696	1.25625	52.3023	40.8153
ABHD17B	9	233	192	127.783	101.733	1.25606	139.318	128.542
Hs.715135	9	71	62	284.604	226.585	1.25606	47.5485	52.4477
PPP1R1B	17	112	93	390.135	310.631	1.25594	120.245	127.891
CA11	19	99	89	170.394	135.684	1.25581	72.4801	80.6552
Hs.162734	5	16	17	64.287	51.1918	1.25581	44.4973	32.4754
Hs.543959	5	16	17	31.826	25.3468	1.25562	52.3003	44.5694
Hs.281929	16	16	17	24.9401	19.8636	1.25557	53.8497	43.0569
PLEKHH1	14	108	75	907.363	722.68	1.25555	65.7466	75.3194
LOC100131541	11	16	11	52.3347	41.6848	1.25549	33.1346	32.043
DENND5A	11	93	83	804.017	640.423	1.25545	48.3873	61.981
Hs.441628	5	16	17	24.5375	19.5456	1.2554	73.1276	36.199
SLCO3A1	15	324	280	131.86	105.047	1.25526	97.2289	83.6885
ZNF639	3	179	137	49.4088	39.3631	1.25521	96.9411	96.364
KIAA1731	11	137	100	33.0816	26.3563	1.25517	71.5798	74.9729
ZCCHC2	18	213	155	41.5433	33.0993	1.25511	121.125	93.3864
RAD21	8	180	162	316.399	252.101	1.25505	95.97	97.1226
Hs.733675	23	16	9	22.3155	17.781	1.25502	29.4301	55.764
NPL	1	235	184	81.4385	64.8912	1.255	85.6976	83.3402
Hs.128527	9	16	17	29.2319	23.2933	1.25495	44.8313	31.6822
Hs.433011	10	16	17	21.4325	17.0798	1.25485	87.1801	61.9436
KAT6A	8	220	178	208.981	166.542	1.25482	102.175	130.382
TMSB4X	23	97	94	4145.84	3304.26	1.25469	97.3095	113.428
Hs.154655	13	40	24	38.9668	31.0574	1.25467	37.6458	30.2951
BOC	3	148	99	86.7512	69.1435	1.25465	80.2933	62.5927
LOC441087	5	28	25	3778.69	3011.74	1.25465	48.5411	53.9444
Hs.733585	2	16	9	11.3436	9.04168	1.25459	31.5965	85.4456
CBX4	17	139	113	115.227	91.8563	1.25443	120.036	153.721
LYSMD3	5	72	60	73.7649	58.8061	1.25437	80.8184	96.7735
Hs.542810	3	16	17	31.8687	25.4088	1.25424	45.9692	80.6796
SOGA1	20	310	254	55.7841	44.482	1.25408	139.717	124.598
Hs.566168	4	16	17	34.1573	27.24	1.25394	56.0751	31.8014
Hs.574219	15	16	17	20.1292	16.0535	1.25388	50.2765	26.8839
Hs.713747	1	71	62	109.14	87.0466	1.25381	44.5648	42.4681
Hs.214491	19	16	17	27.1859	21.6826	1.25381	72.1067	29.5335
LOC100505912	4	40	24	32.7774	26.1462	1.25362	112.354	47.1911
SERINC5	5	93	83	171.793	137.046	1.25354	101.108	102.935
Hs.576748	10	16	17	24.8487	19.8249	1.25341	51.3879	49.5083
Hs.154618	12	16	17	30.4117	24.2655	1.25329	73.0798	37.35
DICER1	14	484	428	139.368	111.206	1.25324	166.032	180.059
H2AFX	11	294	257	62.3198	49.7274	1.25323	124.786	112.291
ABHD17C	15	16	19	528.994	422.225	1.25287	29.629	41.1735
S100B	21	115	100	758.039	605.095	1.25276	100.588	115.232
Hs.584631	23	16	17	30.1823	24.0971	1.25253	58.2233	48.0815
RPS27	1	119	117	3460.32	2762.69	1.25252	63.7504	69.5648
NEO1	15	179	137	170.821	136.395	1.2524	111.465	100.192
Hs.130901	7	16	17	29.4047	23.4855	1.25204	61.8669	49.8312
Hs.544060	5	16	17	22.5584	18.0184	1.25196	60.0289	43.0441
HMGB1	13	325	266	781.479	624.203	1.25196	97.5727	105.267
GIT2	12	268	223	47.5533	37.9852	1.25189	142.947	131.081
Hs.245751	8	16	17	25.1578	20.096	1.25188	51.285	36.2059
Hs.582336	5	16	17	22.305	17.8175	1.25186	54.777	32.7712
PCDH9	13	208	191	700.632	559.682	1.25184	121.233	129.633
FCGR3B	1	180	160	55.951	44.6964	1.2518	100.782	91.9177
VPS13C	15	254	206	92.5109	73.9049	1.25176	133.923	108.225
Hs.698517	19	16	17	44.3729	35.4495	1.25172	51.7403	37.6119
Hs.561594	6	16	17	27.1549	21.6998	1.25139	52.8497	40.4424
Hs.694195	19	40	24	81.6688	65.2645	1.25135	44.2578	31.9222
TREM2	6	99	89	64.7333	51.732	1.25132	64.9582	62.846
LOC283588	14	16	11	53.4683	42.7296	1.25132	41.4531	38.1319
SPRY2	13	99	89	194.928	155.81	1.25106	57.6111	66.2277
Hs.670518	5	40	24	80.9572	64.7381	1.25053	78.2587	61.9163
Hs.545744	9	16	17	24.7631	19.8022	1.25052	99.7104	39.1079
Hs.731901	18	65	56	97.7671	78.1829	1.25049	70.7489	99.4855
SLC36A2	5	28	27	20.7528	16.5968	1.25041	142.729	46.8211
KLF6	10	329	280	90.8512	72.6632	1.25031	113.716	128.637
GUK1	1	194	168	405.914	324.677	1.25021	115.606	124.398
ZBTB20	3	238	189	305.193	244.124	1.25015	113.445	122.626
RPL26	17	93	85	652.414	521.878	1.25013	37.7338	55.842
DEFA4	8	99	89	26.043	20.8338	1.25004	332.361	57.0127
HNRNPC	14	479	397	309.504	247.614	1.24994	97.1241	104.705
Hs.677046	5	40	24	47.8717	38.2997	1.24993	27.7025	21.4823
Hs.581443	3	16	17	33.532	26.8276	1.24991	46.1666	37.141
Hs.536290	12	16	17	19.3015	15.4435	1.24982	33.1829	23.8452
MED13	17	220	186	184.387	147.536	1.24978	144.261	112.585
Hs.658887	13	40	24	32.598	26.0843	1.24972	81.267	74.7982
Hs.566514	6	16	17	42.3439	33.8836	1.24969	42.7402	41.4659
NFASC	1	310	258	115.969	92.8052	1.2496	132.724	140.903
PACS2	14	190	157	215.428	172.398	1.24959	50.8311	97.3985
EEF1A1	6	388	340	4630.48	3706.1	1.24942	77.0461	83.5542
Hs.59554	6	16	9	10.7159	8.57942	1.24902	52.5877	34.0761
Hs.638371	17	16	17	36.13	28.9269	1.24901	53.4942	53.6336
ABL1	9	143	133	129.221	103.459	1.24901	84.4181	81.3533
PPP1R14B	11	28	29	309.095	247.477	1.24899	24.3422	56.2027
MGA	15	193	153	73.5744	58.9117	1.24889	108.73	118.5
EID1	15	164	145	296.225	237.196	1.24886	79.5339	91.4694
PCF11	11	139	113	99.8568	79.9688	1.2487	43.1311	52.5351
SMIM3	5	68	51	66.0612	52.9042	1.24869	52.0192	54.5438
ELOVL1	1	93	83	155.905	124.856	1.24868	78.0157	104.628
Hs.558075	16	16	17	22.7247	18.1994	1.24865	41.8982	30.9663
STARD7	2	155	138	808.411	647.468	1.24857	84.2952	87.2397
Hs.541810	18	16	17	18.8737	15.1178	1.24844	36.1886	33.0134
Hs.732412	1	71	62	232.861	186.537	1.24834	61.8277	82.0819
Hs.413397	6	16	17	42.8734	34.3461	1.24827	47.1057	31.7157
Hs.549435	1	16	17	34.2517	27.4404	1.24822	49.0238	47.6562
Hs.640523	20	16	17	30.7043	24.6008	1.2481	68.445	47.5719
Hs.660202	15	16	9	48.62	38.9645	1.2478	42.7897	32.3793
HCLS1	3	99	89	143.519	115.02	1.24778	117.568	95.7283
CEP97	3	173	131	58.8472	47.1655	1.24768	120.08	114.041
Hs.679144	17	40	24	41.1671	32.9961	1.24764	69.169	50.1293
CMBL	5	148	99	543.284	435.46	1.24761	137.664	135.923
Hs.638374	4	16	9	20.0382	16.0628	1.24749	21.8967	54.8858
POGZ	1	174	168	92.9665	74.5237	1.24748	107.421	107.371
Hs.578211	14	16	17	29.1496	23.3673	1.24745	60.097	48.3678
C3orf58	3	148	99	106.756	85.5819	1.24742	118.955	102.17
TMTC4	13	132	103	159.007	127.477	1.24734	87.6801	73.1802
Hs.138760	5	56	33	126.738	101.618	1.2472	87.5899	74.2522
HNRNPH3	10	304	270	208.604	167.268	1.24713	93.1657	103.802
ZHX1	8	152	117	147.975	118.653	1.24712	94.2892	104.214
FAM69A	1	320	279	632.941	507.572	1.247	167.791	173.07
MGAT4B	5	183	153	59.2212	47.4921	1.24697	95.8115	89.6688
DLC1	8	337	276	117.95	94.5918	1.24694	127.859	121.493
TMEM110	3	213	155	63.2325	50.7207	1.24668	194.948	124.28
TMEM151A	11	116	102	182.61	146.478	1.24667	127.144	108.38
Hs.228474	21	16	9	14.6025	11.7153	1.24645	31.7627	53.5146
ALOX5AP	13	99	89	250.224	200.769	1.24633	127.066	160.883
Hs.662933	4	40	24	37.6903	30.244	1.24621	91.9226	68.2383
OR52E5	11	28	25	24.1613	19.3908	1.24602	79.0764	53.5992
USP30	12	108	75	123.367	99.0106	1.246	119.868	107.791
Hs.538111	1	16	17	25.0601	20.1138	1.24592	60.0797	40.7642
Hs.545144	7	16	17	35.837	28.7638	1.24591	53.1519	29.2857
PTAFR	1	204	171	67.3903	54.0956	1.24576	132.6	141.603
CEBPA-AS1	19	16	19	57.7298	46.3461	1.24562	46.2398	46.8846
Hs.566299	5	16	17	28.889	23.1932	1.24558	40.9274	34.9297
Hs.545394	8	16	17	29.1979	23.4415	1.24557	44.1899	34.0272
Hs.99011	10	16	17	27.644	22.1961	1.24545	73.4275	49.4372
HLA-DMA	6	99	91	179.114	143.816	1.24544	136.298	125.001
CD302	2	109	102	74.6574	59.949	1.24535	71.1322	71.7455
Hs.656363	19	16	9	77.9962	62.6311	1.24533	48.4699	36.6525
ZBTB38	3	217	156	135.2	108.567	1.24531	122.471	127.057
NBPF1	1	536	469	342.23	274.834	1.24522	109.942	112.773
CXCL16	17	84	70	179.184	143.915	1.24507	82.6349	90.2146
Hs.544724	6	16	17	19.7489	15.8635	1.24492	47.4687	26.3071
Hs.650722	7	16	17	28.8801	23.1983	1.24492	38.7806	33.509
SOX2-OT	3	40	26	1529.39	1228.65	1.24477	39.0517	44.6815
Hs.536537	2	40	24	172.024	138.197	1.24477	20.555	30.6735
Hs.687909	9	16	9	10.9768	8.81837	1.24477	54.6729	78.2583
Hs.566189	4	16	17	49.6962	39.9247	1.24475	40.7576	38.5335
C1orf43	1	116	88	920.484	739.601	1.24457	116.798	125.876
Hs.735169	4	16	17	25.9787	20.8745	1.24452	52.1739	35.3985
Hs.592722	16	40	24	107.396	86.3072	1.24434	27.6551	39.957
Hs.568918	11	16	17	35.0406	28.1604	1.24432	46.7659	38.6992
KIAA1751	1	194	188	67.1611	53.9761	1.24427	322.226	228.581
EMC10	19	84	70	145.063	116.595	1.24417	107.637	120.089
DNAJB8-AS1	3	16	11	15.4399	12.4117	1.24397	39.0713	55.6181
DNAJB6	7	257	230	156.407	125.733	1.24396	88.4535	94.1327
Hs.495641	23	16	17	31.1302	25.0269	1.24387	85.4208	39.2456
Hs.649600	4	16	17	21.249	17.0837	1.24382	47.6345	37.4355
Hs.185495	4	16	17	36.4341	29.2954	1.24368	39.7714	30.7402
KMT2A	11	539	436	66.3256	53.3324	1.24363	132.092	113.897
Hs.679915	5	16	17	32.3963	26.0498	1.24363	30.1747	38.8403
ZNF12	7	171	131	89.5088	71.9839	1.24346	62.2592	72.8457
SPOCK1	5	99	89	658.975	529.958	1.24345	59.5789	72.9591
Hs.635306	10	16	17	24.6633	19.835	1.24342	58.6116	39.8375
Hs.603181	10	40	24	19.0915	15.3545	1.24338	58.6379	57.7982
RPS8	1	148	128	797.25	641.281	1.24321	111.728	125.225
PEBP1	12	164	145	1539.72	1238.55	1.24316	46.8213	57.5076
Hs.537695	1	16	17	35.6649	28.6917	1.24304	41.5293	27.6688
Hs.696093	1	40	24	330.65	266.009	1.243	28.8022	23.5825
Hs.543091	3	16	17	21.0775	16.9573	1.24298	44.3749	28.9421
Hs.542756	22	16	17	37.1874	29.9192	1.24293	53.276	59.7718
UBE4A	11	99	89	347.362	279.493	1.24283	110.395	64.3457
RFX1	19	139	113	44.0389	35.4344	1.24283	98.8765	97.4153
Hs.576993	11	16	17	29.9701	24.1205	1.24251	35.1029	36.4136
Hs.540454	16	16	17	33.9562	27.3293	1.24249	60.5216	68.7476
AGPAT4-IT1	6	68	51	86.4129	69.5493	1.24247	51.8767	53.6735
Hs.561208	3	16	17	21.2997	17.1439	1.24241	82.3623	43.963
DDX39B	6	220	194	293.562	236.292	1.24237	121.807	139.672
CCP110	16	109	92	441.732	355.569	1.24232	77.0335	86.4065
Hs.578887	16	16	17	34.5835	27.841	1.24218	37.2652	30.97
LOC728417	1	32	34	56.7866	45.7282	1.24183	33.1854	28.4255
Hs.731746	2	40	24	45.2049	36.4027	1.2418	62.8631	61.3997
Hs.732154	1	40	24	119.819	96.4878	1.2418	45.7217	37.0769
MAF1	8	68	51	143.781	115.786	1.24178	58.45	44.9568
STMN4	8	99	89	793.351	638.924	1.2417	78.214	73.2914
PURA	5	245	218	246.956	198.958	1.24125	128.405	130.215
Hs.564862	16	16	17	28.5633	23.0152	1.24106	50.5939	39.7749
Hs.566820	8	16	17	38.6349	31.1317	1.24102	44.5422	27.0549
ARHGEF2	1	220	180	256.439	206.644	1.24097	122.814	131.799
SELK	3	84	68	516.646	416.329	1.24096	101.213	111.893
CHST11	12	179	137	51.5619	41.5513	1.24092	114.884	111.6
Hs.569114	12	16	17	28.5839	23.0359	1.24084	58.8093	37.2818
Hs.657431	5	40	24	48.3498	38.9656	1.24083	73.6795	53.4218
CHRNA5	15	115	106	111.656	89.9855	1.24082	281.19	242.027
DAAM2	6	93	85	555.335	447.563	1.2408	46.3448	58.1786
Hs.647993	4	16	9	13.4642	10.8516	1.24075	31.7491	35.5914
Hs.737415	16	16	17	35.0226	28.2284	1.24069	34.7405	27.897
RNU11	1	16	19	84.0548	67.7575	1.24052	37.7635	42.7479
Hs.193784	3	96	65	352.847	284.44	1.2405	69.7424	64.8524
Hs.639981	7	16	17	21.6474	17.4508	1.24048	44.1762	39.8021
PELI1	2	179	137	91.2499	73.562	1.24045	85.0306	88.8481
Hs.660954	12	40	24	42.9756	34.6471	1.24038	30.2091	27.479
RELL1	4	56	37	375.673	302.871	1.24037	73.7619	90.4227
Hs.714856	2	40	24	66.0925	53.2992	1.24003	24.0272	32.4369
FA2H	16	139	113	188.086	151.692	1.23992	74.5109	103.189
Hs.580096	2	16	17	32.1023	25.8931	1.2398	55.1934	42.6066
GFAP	17	204	171	3087.05	2490.07	1.23974	128.908	137.7
Hs.545365	8	16	17	27.8329	22.4546	1.23952	39.1993	38.6439
IRF7	11	143	131	41.6369	33.5916	1.2395	94.1054	79.1336
GAS5	1	192	124	311.024	251.006	1.23911	131.277	120.43
AP1G2	14	192	170	30.5511	24.6568	1.23905	98.1531	68.0498
Hs.560742	2	16	17	21.8915	17.668	1.23905	63.9337	28.3452
HSPA8	11	297	254	2026.32	1635.41	1.23903	90.0225	94.3609
Hs.540180	15	16	17	25.4623	20.5526	1.23889	46.1424	34.4654
Hs.714413	1	40	24	219.347	177.064	1.2388	33.4547	34.6732
Hs.545710	9	16	17	28.3931	22.9208	1.23874	61.9616	49.9104
Hs.540005	14	16	17	37.1084	29.9565	1.23874	45.3445	27.6188
Hs.543193	3	16	17	20.5013	16.5503	1.23873	43.8152	40.5046
Hs.610277	16	16	9	103.669	83.6903	1.23872	35.3578	43.0826
LAPTM5	1	164	145	321.053	259.209	1.23859	82.399	106.182
CEP170	1	206	184	167.425	135.18	1.23853	129.293	130.806
Hs.582203	5	16	17	24.7635	19.9961	1.23842	58.8689	33.7559
ALDH6A1	14	239	212	315.785	255.038	1.23819	86.9337	96.2104
ZSCAN29	15	68	51	84.0909	67.9148	1.23818	75.7431	71.6981
Hs.128619	9	40	24	44.3385	35.81	1.23816	69.2971	51.9106
Hs.656390	17	40	24	51.4306	41.5398	1.2381	33.5738	18.9782
SUPT20HL2	23	16	19	33.5172	27.0718	1.23809	45.4013	30.3317
Hs.576064	1	16	17	32.0412	25.8858	1.23779	66.6776	53.5851
FAT3	11	88	63	250.922	202.748	1.23761	89.7143	86.2836
POU6F2-AS1	7	16	17	70.416	56.8993	1.23755	28.8889	31.6137
MOB1B	4	68	55	114.683	92.6758	1.23746	73.8771	80.4451
CORO2B	15	109	100	226.334	182.912	1.23739	51.6537	57.0609
Hs.543494	4	16	17	27.6273	22.3273	1.23738	56.5087	40.6129
Hs.566450	6	16	17	27.1205	21.9194	1.23728	36.0666	38.8373
Hs.662054	2	40	24	90.1623	72.8737	1.23724	50.4118	43.2915
Hs.671504	6	40	24	26.1365	21.1253	1.23721	48.4948	32.6174
KCNJ3	2	204	169	25.4888	20.6057	1.23698	146.137	72.9704
Hs.160416	14	16	17	23.1699	18.733	1.23685	56.6718	24.8102
CREBRF	5	220	149	218.954	177.029	1.23682	63.9043	51.547
PPM1B	2	252	235	189.484	153.206	1.23679	147.608	131.164
SMAD5	5	328	259	94.4455	76.3653	1.23676	103.728	113.232
Hs.397465	7	65	56	119.318	96.4795	1.23672	102.143	106.026
ADAMTS9-AS2	3	48	27	24.1487	19.5265	1.23672	48.3786	34.4076
CD63	12	99	89	816.721	660.431	1.23665	62.6587	77.2461
UBTD2	5	124	92	80.282	64.922	1.23659	75.814	61.926
PHACTR4	1	165	145	89.6411	72.4916	1.23657	87.3883	98.5306
RPL30	8	163	128	2409.7	1948.84	1.23648	98.1899	90.0396
FCHO2	5	84	62	78.8165	63.7467	1.2364	78.1046	70.4683
Hs.552336	10	16	17	38.173	30.8757	1.23635	31.3888	32.7031
Hs.545467	8	16	17	28.5904	23.1251	1.23634	46.6817	36.877
Hs.733614	6	65	56	52.6784	42.6087	1.23633	64.9921	66.5354
ANKRD49	11	93	83	75.3587	60.9623	1.23615	29.9533	41.3859
ZNF721	4	105	80	364.565	294.937	1.23608	129.814	118.422
Hs.530359	23	40	24	100.626	81.4121	1.23601	29.4308	22.5526
Hs.583965	8	16	17	22.1903	17.9545	1.23592	59.2029	44.6886
Hs.559765	1	56	41	57.5858	46.5998	1.23575	56.6279	56.3067
RHBDF2	17	153	142	92.3435	74.7285	1.23572	87.7782	86.3618
Hs.729517	3	16	9	45.6849	36.9787	1.23544	14.78	22.5618
Hs.544142	5	16	17	31.2656	25.3101	1.2353	53.4587	24.7356
DLL1	6	108	75	102.256	82.7802	1.23527	49.8365	43.2945
MURC	9	28	27	53.816	43.5727	1.23509	66.1555	53.6342
PLP1	23	131	123	2515.8	2036.97	1.23507	78.3754	87.9601
Hs.581476	3	16	17	25.0465	20.281	1.23497	60.6519	34.9101
Hs.566795	7	16	17	31.3752	25.4088	1.23482	53.993	67.5146
PALLD	4	239	208	170.139	137.789	1.23479	170.723	133.857
CD163	12	273	243	93.1355	75.4271	1.23478	159.339	119.737
Hs.742502	8	16	17	41.0194	33.2245	1.23461	43.3805	31.67
EIF1AD	11	108	75	61.5818	49.8843	1.23449	60.497	56.6008
Hs.659379	17	16	9	66.7224	54.0539	1.23437	24.4007	27.2641
Hs.661765	1	16	17	171.995	139.339	1.23436	49.6156	46.2338
SEMA6A	5	254	196	178.849	144.895	1.23433	106.477	127.502
ZNF394	7	109	102	148.995	120.718	1.23425	266.656	208.687
FLNA	23	229	205	63.3537	51.331	1.23422	73.4234	76.7727
DUT	15	261	237	198.17	160.568	1.23418	105.942	103.547
LACC1	13	100	69	116.803	94.6479	1.23408	97.2664	94.0308
Hs.572847	20	16	17	28.1879	22.8414	1.23407	40.9506	38.002
Hs.543771	4	16	17	27.57	22.3413	1.23404	49.5449	38.993
Hs.676276	7	65	56	29.2662	23.7174	1.23396	90.5724	83.2955
RASD1	17	68	51	522.863	423.8	1.23375	85.4667	63.0522
Hs.675655	8	16	17	26.7205	21.6606	1.2336	44.1071	47.4866
PELP1	17	77	74	97.634	79.1538	1.23347	96.5486	88.9921
DBI	2	245	218	900.564	730.156	1.23338	69.9994	72.8673
Hs.710432	23	56	41	95.1087	77.1127	1.23337	34.9917	40.6856
Hs.438858	9	40	24	136.129	110.373	1.23335	31.7838	34.7723
Hs.212476	23	16	17	58.8774	47.7403	1.23329	37.1114	30.238
MAVS	20	229	176	73.6158	59.6912	1.23328	124.426	119.111
MS4A7	11	164	116	85.8206	69.5877	1.23327	130.718	94.3428
Hs.595851	2	56	41	40.5052	32.8461	1.23318	72.7185	63.4349
Hs.197703	4	16	17	23.9359	19.4129	1.23299	66.0211	30.5373
Hs.539016	11	16	17	20.1394	16.3347	1.23292	47.4349	32.0233
RPS5	19	123	104	1301.41	1055.57	1.2329	64.1929	71.9437
C4orf3	4	148	101	1067.61	865.936	1.2329	84.2021	84.2585
MVB12B	9	348	306	132.509	107.489	1.23277	161.676	147.663
SMAD9	13	155	132	77.1534	62.5859	1.23276	111.376	110.563
Hs.543909	5	16	17	32.7209	26.5543	1.23222	36.7333	39.6258
FCER1G	1	115	100	151.636	123.081	1.232	76.0447	75.521
PCOLCE-AS1	7	16	9	35.4959	28.8127	1.23196	14.2694	32.7465
Hs.577935	13	16	17	26.6445	21.6283	1.23193	67.827	49.4638
Hs.622240	1	40	24	39.9281	32.4192	1.23162	57.2265	46.8173
Hs.580305	2	16	17	29.8118	24.2077	1.2315	55.3403	44.8962
DTX3	12	328	275	63.4048	51.4884	1.23144	160.817	153.771
CRY1	12	115	106	91.952	74.6721	1.23141	85.0056	71.8234
Hs.744999	10	71	62	298.83	242.673	1.23141	58.8615	49.7912
LOC100287896	11	44	34	62.701	50.9193	1.23138	47.5173	42.0684
Hs.542197	2	16	17	24.0798	19.5568	1.23128	60.4988	55.2458
Hs.565741	21	16	17	21.1917	17.2135	1.23111	46.8571	35.713
Hs.584207	9	16	17	21.8062	17.7127	1.23111	70.752	53.6933
TBC1D17	19	93	83	77.3985	62.8748	1.23099	49.5802	54.0182
MDM4	1	219	163	68.4169	55.5814	1.23093	153.455	151.435
PIK3R1	5	311	279	155.97	126.724	1.23079	134.548	150.362
Hs.444688	4	16	17	18.5805	15.0975	1.2307	43.6175	28.9817
Hs.156349	4	16	17	50.7305	41.2242	1.2306	50.798	55.202
Hs.711299	17	40	24	57.2184	46.4969	1.23059	31.881	29.3854
Hs.595356	13	16	9	62.0798	50.4493	1.23054	35.4697	36.1083
RPS3	11	99	89	1451.65	1179.69	1.23054	39.4159	52.4379
SAC3D1	11	93	83	81.9427	66.5947	1.23047	90.3355	82.8084
Hs.538013	1	16	17	40.3107	32.7628	1.23038	48.2322	34.6151
Hs.607413	4	16	17	27.5491	22.3931	1.23025	58.235	45.3667
RFFL	17	240	168	136.695	111.12	1.23016	115.093	110.02
Hs.561950	9	16	17	42.1248	34.2463	1.23006	61.7586	51.0618
SEPW1	19	115	100	1355.43	1102	1.22998	61.4352	79.2115
Hs.652488	5	16	9	14.8628	12.0838	1.22997	37.5321	35.4382
AFF1	4	229	213	86.0257	69.9417	1.22996	136.381	119.933
PGAM2	7	99	89	46.5461	37.8504	1.22974	167.527	98.071
Hs.731626	10	65	56	43.1845	35.1174	1.22972	56.7744	40.3472
ANKRD13B	17	68	53	90.5326	73.6295	1.22957	67.3307	75.858
Hs.605448	2	40	24	48.3154	39.2965	1.22951	54.8802	38.0465
Hs.659638	12	16	17	35.0108	28.4777	1.22941	40.3166	33.1929
Hs.541221	19	16	17	88.7697	72.2061	1.22939	47.6429	37.4502
Hs.676885	14	40	24	59.1166	48.0894	1.2293	38.9071	32.6517
PLTP	20	115	106	140.171	114.04	1.22914	81.2843	79.6959
Hs.570966	5	16	17	20.5438	16.7172	1.22891	48.5781	40.9518
Hs.129244	20	16	17	23.5725	19.183	1.22882	55.8365	37.4723
CLDN19	1	76	56	30.201	24.5792	1.22872	152.202	37.1103
Hs.560736	2	16	17	35.1394	28.5984	1.22872	61.7509	47.512
Hs.567106	23	16	17	27.8805	22.6911	1.2287	43.0887	24.5075
KIAA1147	7	128	103	349.854	284.736	1.2287	107.165	108.831
Hs.563808	1	16	17	26.1821	21.3092	1.22868	46.3989	31.1118
Hs.538738	11	16	17	36.9565	30.079	1.22865	57.7469	43.3904
FSCN1	7	164	145	269.113	219.041	1.2286	162.192	164.975
Hs.133031	1	16	17	22.2278	18.0933	1.22851	41.6903	42.222
LOC100506282	11	65	58	19.5364	15.9059	1.22825	79.0508	64.564
NR2F1-AS1	5	88	63	98.068	79.8512	1.22813	95.0316	85.2894
THRB	3	179	139	35.4356	28.854	1.2281	84.4788	63.4568
CERS4	19	93	83	41.5865	33.8627	1.22809	78.3142	83.6758
Hs.670193	1	16	9	26.3948	21.4943	1.22799	28.2111	33.4051
RARRES2	7	99	89	116.59	94.9655	1.22771	70.2601	83.5478
HSPE1	2	115	108	386.438	314.786	1.22762	71.7179	81.6856
TMCC2	1	109	92	156.847	127.773	1.22754	60.7345	78.9711
Hs.581701	4	16	17	31.8068	25.9112	1.22753	44.733	36.0297
SP1	12	189	140	73.6444	59.9986	1.22744	78.3681	83.2573
LOC100131564	1	40	26	156.209	127.267	1.22741	34.8542	36.2111
Hs.719706	8	16	17	31.9027	25.9934	1.22734	50.1881	34.7894
Hs.521759	8	16	17	38.1958	31.1221	1.22729	17.7799	28.0252
Hs.98144	11	16	17	29.7155	24.2127	1.22727	66.2711	31.5556
TMEM184B	22	93	85	132.426	107.922	1.22706	59.7244	66.8707
CWC22	2	68	51	67.2641	54.8184	1.22704	58.4479	58.7508
Hs.536240	10	16	17	30.9598	25.2361	1.22681	34.8292	33.355
IRX1	5	68	51	45.8134	37.3475	1.22668	53.7112	38.9972
SH3PXD2B	5	84	60	67.2674	54.8388	1.22664	55.7213	49.8086
SGPP1	14	139	113	114.181	93.0893	1.22658	113.544	119.244
Hs.662148	8	40	24	26.5169	21.6202	1.22649	72.3112	40.8953
Hs.540398	15	16	17	22.9132	18.6835	1.22639	57.8737	32.5992
CEBPG	19	139	113	109.501	89.2936	1.2263	96.1748	96.8829
SEPP1	5	235	182	1155.23	942.104	1.22622	199.647	213.429
Hs.543464	4	16	17	27.1857	22.1712	1.22617	55.0978	32.1442
Hs.664538	2	40	24	76.8943	62.7144	1.2261	78.2388	63.3319
SLC35E1	19	359	288	179.609	146.491	1.22607	165.957	140.124
Hs.660127	15	40	24	24.2155	19.7505	1.22607	85.7376	66.6909
Hs.553354	14	16	17	27.0884	22.0943	1.22604	35.4701	33.5141
COMMD6	13	136	102	469.424	382.901	1.22597	129.21	117.816
Hs.650506	13	16	17	35.219	28.7308	1.22583	68.1316	42.1327
Hs.570146	2	16	17	30.9801	25.2748	1.22573	59.6547	35.6092
Hs.567127	23	16	17	29.6261	24.1704	1.22572	33.1728	25.9938
CTAGE6	7	32	34	32.7077	26.6859	1.22566	58.6676	34.3408
Hs.565133	18	16	17	30.1504	24.6006	1.2256	46.5666	52.6398
Hs.567033	9	16	17	56.1864	45.8474	1.22551	19.7644	34.5269
C8orf46	8	148	99	263.114	214.711	1.22543	88.4378	75.017
Hs.542636	21	16	17	20.5743	16.79	1.22539	57.2478	50.6696
Hs.562523	14	16	17	31.6675	25.8435	1.22536	59.5681	38.6326
Hs.649237	16	40	24	32.0974	26.1946	1.22534	94.4917	96.5202
Hs.662710	18	40	24	59.7203	48.7465	1.22512	41.2822	24.6267
Hs.571535	8	16	17	24.148	19.7111	1.22509	71.9165	31.0672
TMEM133	11	68	51	38.0008	31.0199	1.22505	49.4721	45.3695
CD22	19	294	257	51.4141	41.9734	1.22492	79.9414	89.0238
Hs.275545	1	16	17	17.4897	14.2785	1.2249	21.0862	29.2599
SECISBP2	9	133	111	111.386	90.9373	1.22486	72.8893	72.8496
CXCL11	4	180	162	23.5715	19.2447	1.22483	312.023	150.979
Hs.566037	4	16	17	32.8662	26.8361	1.2247	50.8972	39.0465
TENC1	12	165	150	60.5565	49.4513	1.22457	81.8359	82.6386
NPM1	5	253	220	797.606	651.406	1.22444	126.852	135.336
SBNO1	12	303	245	62.089	50.7133	1.22431	155.676	161.035
Hs.637767	9	16	17	24.3042	19.8516	1.22429	65.5249	40.9391
Hs.658791	1	40	24	46.0659	37.6278	1.22425	67.3687	54.6926
Hs.645916	16	40	24	161.666	132.054	1.22424	35.3428	25.4437
Hs.442306	1	16	17	36.5917	29.8931	1.22409	45.6509	51.3069
Hs.709775	9	80	50	143.872	117.538	1.22405	93.3174	92.0553
LGR6	1	140	120	54.6323	44.6351	1.22398	129.211	102.842
Hs.527062	4	16	17	19.4583	15.901	1.22371	53.8339	27.2658
SPTBN1	2	628	509	286.817	234.385	1.2237	216.462	213.033
Hs.580827	20	16	17	31.1599	25.466	1.22359	33.8438	42.488
Hs.737831	9	16	17	32.006	26.1579	1.22357	77.2918	74.3691
PPA1	10	99	91	1230.88	1006.01	1.22352	59.1192	58.3954
Hs.368029	7	16	17	23.8839	19.5217	1.22346	39.3556	34.3386
CTDSP2	12	164	147	236.646	193.431	1.22341	79.0651	83.2932
CSF1R	5	99	89	359.74	294.058	1.22337	108.267	118.764
HERPUD2	7	116	86	126.464	103.374	1.22336	69.8652	74.1597
GREM1	15	180	164	67.7493	55.3818	1.22331	98.9269	91.3903
Hs.549841	11	16	9	15.052	12.3046	1.22328	30.8935	40.6506
Hs.582064	4	16	17	25.5602	20.895	1.22327	59.1954	34.9054
Hs.98754	5	16	17	24.6565	20.1564	1.22326	60.8757	40.5941
CAMTA1	1	229	166	366.012	299.234	1.22317	110.916	119.708
Hs.656767	3	40	24	56.8914	46.5146	1.22309	28.7548	27.1217
RBBP6	16	465	365	52.7293	43.1124	1.22306	95.2401	73.6195
Hs.61257	18	16	17	31.6593	25.886	1.22303	41.8973	54.9692
Hs.16920	3	16	17	27.4154	22.4165	1.223	37.2722	42.0502
Hs.561477	5	16	17	17.5408	14.3428	1.22297	36.6948	38.9182
Hs.130563	11	16	17	23.2359	19.0005	1.22291	45.0375	52.8317
Hs.693701	9	65	56	115.914	94.7865	1.2229	61.1576	60.269
FXYD1	19	143	131	210.667	172.29	1.22274	77.4579	81.2993
Hs.380243	21	16	17	19.6649	16.0862	1.22247	60.6166	26.4788
FEZ1	11	224	204	1091.24	892.663	1.22246	113.398	116.543
Hs.543831	5	16	17	22.9705	18.7908	1.22244	54.3076	40.9133
Hs.655315	12	40	24	61.0116	49.9191	1.22221	32.4413	24.7892
MIA	19	99	89	22.8569	18.7021	1.22216	66.2962	30.3016
MARCH6	5	408	376	273.376	223.685	1.22215	140.469	131.542
Hs.565868	3	16	17	20.623	16.875	1.2221	55.6582	35.7568
Hs.551378	18	16	17	24.0438	19.6748	1.22206	30.083	37.5054
RPS28	19	229	203	1136.18	929.739	1.22204	128.463	135.879
Hs.680526	1	32	18	145.917	119.405	1.22204	43.2836	37.893
SNORD4A	17	16	17	37.5099	30.6969	1.22195	27.4852	25.2927
Hs.155764	10	40	24	40.1232	32.8356	1.22194	35.7439	38.0621
RPS6KA1	1	127	116	64.2582	52.5895	1.22188	79.1894	72.3807
Hs.131611	4	16	17	27.8978	22.8345	1.22174	52.4928	53.9629
Hs.583127	7	16	17	18.7155	15.3191	1.22171	35.8233	23.5766
TMEM161B-AS1	5	160	96	51.1168	41.8417	1.22167	117.984	90.9496
ADORA3	1	167	140	149.978	122.769	1.22162	103.277	117.349
Hs.584492	23	16	17	26.7667	21.9139	1.22145	53.6337	70.0721
SPRED3	19	104	96	67.7188	55.4418	1.22144	121.874	126.731
RPL19	17	123	104	1989.06	1628.54	1.22138	52.7267	59.4799
ANKRD13D	11	228	184	49.1783	40.269	1.22124	97.7746	84.4243
PNN	14	261	219	294.989	241.556	1.2212	127.236	135.216
Hs.663146	2	65	56	21.0511	17.241	1.22099	70.7782	64.0584
OLIG1	21	68	51	1699.22	1391.7	1.22097	41.1426	47.6391
Hs.662829	19	40	24	55.4672	45.4312	1.22091	44.8863	32.2124
Hs.543519	4	16	17	27.359	22.4109	1.22079	42.379	40.1092
SEMA3B	3	180	162	103.31	84.6364	1.22064	98.4369	111.979
Hs.656087	8	40	24	40.0562	32.8175	1.22057	67.9866	46.5658
NUTM2F	9	56	45	94.1835	77.164	1.22056	92.1606	94.4124
Hs.559948	11	16	17	45.6519	37.403	1.22054	55.5018	47.0224
SORBS1	10	345	305	199.914	163.799	1.22048	136.87	155.133
VAMP8	2	99	89	136.635	111.96	1.22039	121.93	126.211
Hs.538756	11	16	17	18.7041	15.3265	1.22038	54.976	25.8237
ZSCAN31	6	121	108	63.5687	52.0928	1.2203	112.872	93.7618
Hs.528243	7	16	17	31.102	25.4885	1.22024	55.7029	52.3047
Hs.656379	3	40	24	37.3332	30.5953	1.22023	69.4964	53.4785
MBNL1	3	398	333	95.1827	78.0118	1.22011	131.161	118.057
Hs.661865	3	65	56	17.6292	14.4491	1.22009	51.918	53.9562
Hs.406371	9	56	41	50.7902	41.6288	1.22008	41.9568	39.5624
THOC1	18	99	89	128.178	105.08	1.21982	44.0108	54.3823
Hs.663425	6	40	24	46.5975	38.2032	1.21973	25.9615	27.6066
Hs.661554	4	40	24	60.4459	49.5571	1.21972	31.8144	38.8098
Hs.657534	15	40	24	118.122	96.8461	1.21968	51.0925	42.6545
RNASE1	14	180	162	413.218	338.797	1.21966	106.639	115.013
Hs.624381	8	16	17	24.3624	19.975	1.21965	41.3489	47.4984
SART1	11	163	128	76.2185	62.4925	1.21964	79.3947	73.8226
Hs.370387	12	16	17	30.6738	25.1504	1.21962	62.8628	45.0103
Hs.539605	13	16	17	37.5612	30.7977	1.21961	46.9672	39.192
Hs.519556	5	16	17	24.1314	19.7867	1.21958	61.0765	48.8814
TDRG1	6	72	60	66.8291	54.8141	1.21919	110.983	117.104
Hs.664312	4	40	24	104.773	85.939	1.21916	127.008	129.861
WDR45B	17	93	83	305.957	250.96	1.21915	40.4794	44.2611
Hs.735507	2	40	24	25.1345	20.617	1.21912	59.3152	50.586
Hs.211485	21	16	17	28.4141	23.3094	1.219	58.0789	50.4788
ARHGAP31	3	108	75	90.5087	74.2492	1.21899	122.522	114.294
LCP1	13	99	89	120.848	99.15	1.21884	120.84	95.6496
LGI3	8	68	51	244.217	200.377	1.21879	61.4588	66.393
DDX5	17	179	145	986.996	809.827	1.21877	90.8041	104.038
BSG	19	127	114	285.962	234.632	1.21877	120.16	137.046
Hs.707586	7	40	24	216.802	177.895	1.21871	27.5107	25.4529
SSRP1	11	164	145	80.3888	65.9658	1.21864	61.8818	67.099
Hs.581341	3	16	17	22.587	18.5374	1.21846	58.9479	35.3551
FGD4	12	148	103	95.4265	78.3274	1.2183	118.873	112.266
Hs.583146	7	16	17	31.5899	25.9304	1.21826	52.9033	33.7669
MBD4	3	294	257	115.632	94.9215	1.21819	191.442	146.805
Hs.537360	21	16	17	28.2956	23.2286	1.21814	56.2998	40.5478
RPL35	9	123	106	1722.78	1414.48	1.21796	66.1507	75.8724
Hs.644033	17	40	24	145.908	119.804	1.21789	36.8537	38.1428
Hs.583885	8	16	17	18.726	15.3769	1.2178	58.3322	38.0307
Hs.442246	2	16	17	41.6313	34.1888	1.21769	59.3557	47.363
Hs.551353	15	16	17	23.2076	19.0591	1.21766	51.1402	32.2116
HINT3	6	164	116	86.622	71.1391	1.21764	134.451	128.125
ARL8A	1	68	51	213.108	175.026	1.21758	92.2049	106.605
SPAG9	17	345	295	191.945	157.649	1.21754	109.564	105.537
ZNF160	19	249	195	165.045	135.567	1.21744	162.626	138.258
C11orf30	11	269	188	44.9472	36.9209	1.21739	111.504	105.69
CCDC117	22	124	92	70.0385	57.5323	1.21738	85.0628	77.8658
Hs.683385	5	16	9	30.6768	25.201	1.21728	35.5523	27.0436
Hs.738242	9	16	17	42.0359	34.5341	1.21723	68.4911	33.123
Hs.189623	4	16	17	19.7643	16.2374	1.21721	57.2662	32.591
SBF2	11	164	116	102.788	84.447	1.21719	109.331	93.9514
Hs.72488	6	16	17	53.6474	44.0803	1.21704	39.9007	31.2449
ZNF549	19	93	91	392.01	322.116	1.21698	274.547	262.201
NR2C2	3	139	115	73.8333	60.6725	1.21692	118.939	118.151
PLXNB1	3	164	145	149.07	122.502	1.21688	131.413	138.966
Hs.539928	14	16	17	22.0127	18.0895	1.21688	40.287	49.6897
Hs.735429	4	16	17	31.6332	25.9954	1.21687	77.7753	39.7889
ZFP14	19	68	51	65.2267	53.6032	1.21684	43.5852	40.682
PRPF3	1	99	89	83.8833	68.9353	1.21684	71.0923	74.4674
ATP2B1	12	261	237	51.1143	42.0077	1.21679	136.914	86.9586
PTPLAD2	9	108	75	158.076	129.913	1.21678	157.185	120.625
OMA1	1	124	94	110.975	91.2037	1.21678	50.4514	47.7107
Hs.537744	1	16	17	22.8327	18.765	1.21677	67.63	40.5369
S100A11	1	170	153	89.3512	73.4342	1.21675	67.1118	85.3737
Hs.597817	11	16	9	23.3994	19.2331	1.21662	29.1158	22.2507
ZC3H12C	11	56	35	71.87	59.0741	1.21661	66.0863	73.6916
Hs.652417	23	16	17	27.0763	22.256	1.21658	42.1739	44.8592
Hs.572122	11	16	17	42.8806	35.2482	1.21653	55.8328	69.6439
TBC1D3C	17	137	123	38.8812	31.9614	1.2165	83.1686	68.7015
DNAJA1	9	164	145	578.244	475.347	1.21647	62.0289	93.6968
MYLIP	6	299	209	124.021	101.952	1.21646	126.055	103.165
Hs.149514	3	16	17	30.725	25.2593	1.21639	37.4728	31.2138
Hs.595500	10	71	62	76.9036	63.2264	1.21632	61.6902	72.5821
PAX6	11	171	153	69.4278	57.0827	1.21627	100.627	82.5908
Hs.541639	2	16	17	27.9123	22.9492	1.21626	32.6886	24.0147
Hs.540023	14	16	17	22.8272	18.7708	1.2161	70.0879	49.4802
ARHGDIB	12	131	107	353.058	290.34	1.21602	124.844	115.983
C20orf194	20	144	118	203.159	167.084	1.21591	79.0474	94.9743
RPS4X	23	245	220	1271.27	1045.53	1.21591	91.236	102.156
Hs.543614	4	16	17	31.5115	25.9166	1.21588	49.0264	47.2499
Hs.581707	4	16	17	21.4075	17.6072	1.21583	42.8963	24.7391
PIDD	11	196	179	47.5248	39.0916	1.21573	109.196	92.5265
Hs.569354	14	16	17	24.6999	20.3172	1.21572	66.7428	40.7429
Hs.563552	8	16	17	30.248	24.8846	1.21553	28.6873	31.3899
Hs.545631	9	16	17	46.1598	37.9829	1.21528	52.2127	43.4908
Hs.721349	6	48	27	36.323	29.8901	1.21522	56.9164	56.588
LOC644656	11	56	43	27.147	22.3414	1.2151	57.2959	43.5737
Hs.710276	2	16	9	42.1667	34.7028	1.21508	39.4262	33.752
Hs.542852	3	16	17	31.722	26.1069	1.21508	47.377	37.2366
RNASE2	14	99	91	60.2905	49.6218	1.215	95.0444	77.4737
Hs.560137	13	16	17	27.5951	22.7176	1.2147	55.9011	41.304
LOC100130987	11	56	35	26.8083	22.0721	1.21458	64.5691	57.1466
Hs.687812	6	16	17	26.3962	21.7336	1.21453	55.9318	32.9619
HLA-DRB1	6	672	597	194.799	160.395	1.2145	122.75	128.379
CACYBP	1	338	303	208.214	171.463	1.21434	112.437	163.015
Hs.707733	11	71	62	336.274	276.928	1.2143	67.6939	83.6669
Hs.658828	10	16	9	35.6262	29.3391	1.21429	37.1944	18.3184
AIRE	21	143	131	363.377	299.284	1.21415	303.9	261.013
Hs.301281	1	65	56	486.39	400.617	1.2141	39.1831	56.2561
LOC100506406	5	56	41	68.8768	56.7317	1.21408	85.259	77.4622
MAG	19	180	162	460.679	379.449	1.21407	172.253	195.1
RAX2	19	44	36	189.63	156.209	1.21395	103.664	76.3951
CYP27A1	2	99	89	191.095	157.426	1.21387	73.0787	85.8322
HIST1H4H	6	220	186	31.2108	25.7152	1.21371	103.318	80.406
ZNF275	23	112	86	130.47	107.499	1.21368	48.5942	58.4106
Hs.568117	9	16	17	22.8422	18.8211	1.21365	86.5282	49.8251
PPM1K	4	244	166	265.583	218.831	1.21364	133.894	129.918
FRA10AC1	10	248	193	120.426	99.2323	1.21358	201.734	220.831
Hs.522545	19	40	24	137.835	113.582	1.21353	34.233	30.4584
Hs.667390	3	16	17	83.4683	68.7925	1.21334	37.4024	39.5055
ANKRD36B	2	161	164	65.9548	54.3645	1.2132	156.825	170.284
LOC100131034	14	16	19	25.1895	20.7632	1.21318	67.7792	59.5628
Hs.665135	1	40	24	29.3599	24.2012	1.21316	80.1297	66.4916
PDE6B	4	115	98	37.3695	30.8034	1.21316	130.968	84.4339
GNAO1	16	313	271	330.604	272.534	1.21307	181.809	176.67
Hs.537678	1	16	17	22.5033	18.5516	1.21301	30.5708	47.5062
C19orf43	19	108	75	312.172	257.37	1.21293	101.536	95.9598
Hs.552354	12	16	17	30.2915	24.9749	1.21288	48.6797	33.0374
TMTC1	12	232	169	127.56	105.173	1.21285	140.125	136.325
GABARAP	17	99	89	706.942	582.923	1.21275	74.4178	99.3552
Hs.574267	15	16	17	25.0149	20.6276	1.21269	63.4585	33.2226
Hs.581359	3	16	17	26.3737	21.7494	1.21262	57.9211	32.1113
Hs.139898	10	16	17	25.1879	20.7736	1.2125	57.2143	36.9862
Hs.522954	1	16	9	16.5559	13.6551	1.21243	33.3029	39.763
Hs.604501	3	40	24	16.3835	13.5131	1.21241	36.473	29.2276
Hs.674410	1	16	9	56.0344	46.2176	1.2124	33.2063	61.7275
RTN4	2	289	260	1743.59	1438.23	1.21232	98.5205	92.5413
PAIP2B	2	81	77	344.072	283.829	1.21225	86.9142	111.235
Hs.722308	8	40	24	391.606	323.046	1.21223	43.7138	28.403
MRPL27	17	124	101	234.225	193.235	1.21213	110.564	113.952
JMY	5	108	77	105.276	86.8526	1.21212	107.78	105.866
Hs.125693	11	16	17	23.2499	19.182	1.21207	36.3637	45.2405
IPO13	1	93	83	228.359	188.418	1.21198	45.3665	70.611
PRAMEF19	1	16	19	30.1726	24.8968	1.21191	41.4644	42.0036
IFITM2	11	99	89	796.397	657.228	1.21175	54.0248	72.1412
SNORD33	19	16	17	85.4043	70.5067	1.21129	34.4682	21.007
PDGFRB	5	99	89	104.116	85.9568	1.21126	88.0489	93.0199
Hs.144312	19	16	17	34.7685	28.7051	1.21123	56.8988	31.9147
Hs.544890	7	16	17	33.6046	27.7443	1.21123	44.2387	40.8416
Hs.18070	19	40	24	56.0796	46.3032	1.21114	39.5243	23.335
Hs.444493	15	16	17	20.1559	16.6435	1.21103	51.2808	36.178
Hs.639790	4	16	17	20.7042	17.0966	1.21101	48.6524	33.6229
Hs.639544	6	16	17	19.7601	16.3175	1.21097	57.3596	41.7389
TULP3	12	164	145	46.8569	38.6941	1.21096	82.4011	45.7197
Hs.707091	14	201	174	113.785	93.9632	1.21095	148.101	174.256
Hs.542853	3	16	17	23.1063	19.082	1.21089	52.8183	47.256
ZNF563	19	44	38	29.4383	24.3151	1.2107	62.6223	47.4183
Hs.656628	2	16	9	36.8486	30.4391	1.21057	43.189	46.8308
MRPS5	2	188	125	109.86	90.7515	1.21056	132.247	113.116
Hs.530183	8	16	17	36.3218	30.0087	1.21038	54.3456	51.4163
HDGF	1	99	91	252.847	208.927	1.21021	42.5068	59.1896
Hs.712879	5	65	56	871.298	719.996	1.21014	157.068	122.555
Hs.724945	8	16	17	23.0476	19.0469	1.21005	60.8338	37.1548
NAP1L1	12	472	412	577.302	477.095	1.21004	84.7496	100.212
RNF141	11	171	131	311.319	257.29	1.20999	142.849	153.696
PPP1CB	2	285	244	408.054	337.24	1.20998	175.875	213.816
Hs.543807	5	16	17	30.487	25.1987	1.20986	45.7058	39.2826
ATG12	5	245	220	139.008	114.899	1.20982	190.635	163.543
Hs.655770	2	120	72	99.2052	82.0013	1.2098	129.309	126.324
H2AFZ	4	164	145	357.445	295.48	1.20971	67.5599	68.6212
TSPAN5	4	244	193	123.068	101.736	1.20968	97.4526	100.823
Hs.710362	9	16	17	20.3275	16.8041	1.20967	31.7521	44.2859
FUT8-AS1	14	80	50	49.8486	41.2174	1.20941	82.4618	62.2452
IFI6	1	115	108	373.386	308.737	1.2094	167.376	146.699
WAS	23	164	145	103.679	85.7347	1.2093	100.854	92.1432
Hs.544903	7	16	17	33.6842	27.8552	1.20926	52.3966	36.4847
Hs.735209	8	16	17	43.6868	36.1279	1.20923	67.1949	29.5743
FAM13C	10	141	126	85.9736	71.1005	1.20918	151.067	150.57
PSME2	14	99	89	153.324	126.802	1.20916	43.3284	47.2629
Hs.662858	2	40	24	50.9544	42.1431	1.20908	28.0212	19.1049
Hs.710774	22	40	24	56.4561	46.6986	1.20894	104.811	108.48
PIEZO1	16	125	101	93.1924	77.0862	1.20894	111.501	121.415
ITM2B	13	180	164	1246.33	1030.95	1.20891	77.8989	87.8889
Hs.473802	21	16	17	25.9682	21.4809	1.2089	50.5742	34.2597
DCLRE1C	10	230	199	69.1274	57.1827	1.20889	135.527	114.472
NUDT5	10	68	51	151.054	124.957	1.20885	38.5051	47.0186
Hs.596214	6	80	48	39.1333	32.3728	1.20883	72.5766	53.4119
Hs.634573	5	16	17	38.2964	31.6814	1.2088	38.109	46.6122
C2orf40	2	68	51	207.282	171.487	1.20874	104.145	70.4584
Hs.583321	7	16	17	28.1796	23.3137	1.20872	49.11	43.6141
Hs.147730	6	16	17	30.6882	25.3918	1.20859	71.0033	40.4286
Hs.544145	5	16	17	46.7476	38.682	1.20851	41.1246	31.3721
Hs.170508	1	16	17	30.6616	25.3731	1.20843	61.1868	36.694
Hs.201038	12	16	17	30.9564	25.6181	1.20838	45.5528	24.8993
TM7SF3	12	179	139	93.2688	77.1851	1.20838	76.8779	80.8706
Hs.538921	11	16	17	29.079	24.065	1.20835	50.8782	38.7393
Hs.545986	23	16	17	22.3028	18.4577	1.20832	43.0608	29
ERRFI1	1	68	51	234.146	193.8	1.20818	27.1862	31.0319
Hs.554643	2	16	17	31.5723	26.1333	1.20813	57.3927	36.2656
MT1E	16	109	100	1462.99	1211.15	1.20793	77.9915	86.6712
Hs.575028	3	16	17	39.6555	32.8295	1.20792	56.0841	41.5079
EEF1B2	2	175	165	679.657	562.673	1.20791	154.151	94.2413
NSRP1	17	68	53	212.088	175.583	1.2079	62.8808	72.7974
OR14A16	1	28	27	19.826	16.417	1.20765	38.6673	30.4397
Hs.565633	20	16	17	60.0765	49.748	1.20761	52.7619	47.43
PRELP	1	220	186	89.0706	73.7675	1.20745	87.5948	84.7167
Hs.540063	14	16	17	25.1209	20.8051	1.20744	54.5159	38.723
GIMAP4	7	93	83	134.324	111.251	1.20739	98.5014	108.132
Hs.119900	7	16	17	37.2607	30.8611	1.20737	66.6586	42.2785
Hs.664815	3	16	9	35.1491	29.1166	1.20719	19.2564	22.6978
Hs.539677	13	16	17	20.9168	17.3271	1.20718	57.0022	50.7841
Hs.564789	15	16	17	18.5767	15.3893	1.20712	67.5505	47.9728
PLD1	3	350	290	50.3737	41.7317	1.20708	110.043	103.997
Hs.440088	5	16	17	164.924	136.639	1.20701	24.3127	31.7514
CNP	17	109	94	1205.69	998.931	1.20698	77.9388	95.8739
Hs.402242	2	16	17	21.0835	17.4681	1.20697	37.6207	30.3458
Hs.569588	16	16	19	32.4915	26.9205	1.20694	44.9065	37.1246
Hs.528174	2	16	17	31.2624	25.9047	1.20682	74.9089	47.9244
Hs.738249	5	16	17	21.9113	18.1573	1.20674	82.1679	29.3588
Hs.697113	18	40	24	43.5761	36.1138	1.20663	23.3495	17.073
FAU	11	123	104	1870.55	1550.49	1.20642	42.5477	45.2452
LPL	8	164	145	99.9831	82.8756	1.20642	112.152	87.7659
Hs.521794	8	16	17	20.3983	16.9097	1.20631	50.1285	41.1301
Hs.404304	2	16	9	14.731	12.2118	1.20629	37.648	46.4752
Hs.547732	6	16	17	29.4564	24.4195	1.20627	26.1144	34.3794
Hs.561764	7	16	17	21.7613	18.0402	1.20627	39.5949	30.1025
PRUNE2	9	153	138	388.331	321.943	1.20621	77.5336	110.702
NXF1	11	115	106	130.161	107.913	1.20616	34.2263	46.4671
Hs.734493	7	16	17	22.2455	18.4441	1.20611	48.1895	37.9785
CPEB2	4	164	116	159.209	132.019	1.20595	138.672	125.849
LGALS3BP	17	99	89	225.468	186.964	1.20595	53.3397	69.9527
Hs.579904	19	16	17	53.2457	44.1554	1.20587	48.3133	64.6036
DCP1A	3	139	115	59.8966	49.6713	1.20586	38.6562	39.4857
PLAC8	4	109	102	42.3793	35.1446	1.20585	105.76	68.5261
MFAP3L	4	332	295	102.563	85.055	1.20585	180.118	189.044
APBB1IP	10	155	124	142.519	118.191	1.20584	164.144	232.997
BHMT2	5	155	130	49.8982	41.3815	1.20581	78.8805	66.4259
Hs.540526	16	16	17	26.1199	21.6618	1.20581	61.1544	44.0815
Hs.545021	7	16	17	24.6397	20.4355	1.20573	43.9097	31.3272
GTF2I	7	301	261	497.106	412.317	1.20564	158.296	170.061
LOC642934	10	16	17	458.777	380.531	1.20562	40.6639	30.7688
Hs.553324	10	16	9	18.119	15.0313	1.20542	27.1667	31.6807
Hs.581114	22	16	17	35.14	29.1542	1.20532	58.3389	46.224
EVA1B	1	198	163	47.9679	39.8011	1.20519	112.165	112.605
Hs.428111	17	16	17	27.775	23.0464	1.20518	86.7687	56.5557
EIF4EBP2	10	244	195	109.46	90.8263	1.20516	99.2707	112.76
PRR12	19	56	43	167.321	138.84	1.20514	94.4167	105.544
NDUFB4	3	155	130	361.062	299.604	1.20513	127.985	132.785
Hs.735990	3	40	24	43.4724	36.0737	1.2051	68.1526	53.3767
MUTYH	1	131	123	63.8562	52.9907	1.20504	69.6138	69.5571
Hs.541929	2	16	17	30.1259	24.9998	1.20504	69.5775	43.7545
Hs.687496	17	40	24	25.3478	21.035	1.20503	72.1682	58.7498
Hs.734061	9	16	9	13.8715	11.5119	1.20497	26.5465	36.033
Hs.282194	1	16	17	17.89	14.8481	1.20487	66.9673	22.6484
Hs.658518	7	16	9	32.5079	26.9805	1.20487	33.4651	34.9377
Hs.554347	9	16	17	18.9746	15.7491	1.20481	31.7293	41.17
TAPT1-AS1	4	60	53	80.5571	66.8688	1.2047	42.7707	75.9821
Hs.732969	3	40	24	40.5228	33.6374	1.20469	65.5774	66.9351
ZNF507	19	173	133	55.3294	45.9305	1.20463	112.555	96.2508
Hs.649287	14	16	17	21.9442	18.2167	1.20462	36.3794	34.2585
Hs.557991	12	16	17	32.5159	26.9932	1.2046	60.207	20.4569
Hs.670861	5	80	48	59.7781	49.628	1.20452	89.859	89.2067
Hs.667113	15	40	24	46.1345	38.3054	1.20439	33.907	30.6091
NPC1	18	164	145	227.485	188.882	1.20437	92.1031	98.5524
FCN1	9	99	91	29.1032	24.1666	1.20427	242.374	80.4741
NRGN	11	99	89	74.9739	62.2589	1.20423	72.3615	70.6955
PRCD	17	56	35	103.01	85.5473	1.20413	68.7553	59.06
SLC25A37	8	463	341	63.8815	53.0553	1.20405	134.268	135.401
BRICD5	16	44	36	57.4431	47.709	1.20403	44.7207	49.0504
Hs.563846	1	16	17	23.1622	19.2384	1.20396	54.9975	33.2902
TGFBI	5	99	89	58.9396	48.9583	1.20387	79.4692	59.6917
Hs.541637	2	16	17	27.3523	22.723	1.20373	34.5428	27.998
Hs.658088	16	16	9	37.5134	31.1648	1.20371	25.1774	19.9576
Hs.537676	1	16	17	27.4295	22.793	1.20342	44.9436	30.2525
NAA60	16	158	141	137.095	113.924	1.2034	114.09	100.406
SNORD42B	17	16	17	32.4979	27.0062	1.20335	56.9428	36.7506
ELL2	5	244	193	111.581	92.7263	1.20334	131.736	157.576
WWC3	23	133	107	145.616	121.012	1.20332	59.6024	95.5808
HLA-C	6	310	278	637.156	529.501	1.20331	87.282	95.5069
SPSB1	1	133	109	58.59	48.6989	1.20311	64.0648	59.7109
TCF4	18	529	449	249.618	207.494	1.20301	140.851	160.372
DDR1	6	326	293	544.912	453.006	1.20288	59.9246	83.8328
LATS1	6	181	144	35.3778	29.4111	1.20287	109.107	95.4958
FPR1	19	164	145	64.1558	53.3376	1.20282	128.151	137.357
FBRS	16	105	86	63.3621	52.6795	1.20278	66.0954	70.0635
Hs.540096	14	16	17	17.8665	14.8545	1.20276	45.2781	23.9632
THAP8	19	68	51	79.0831	65.7549	1.2027	77.0592	83.4338
PTGR2	14	84	68	77.8603	64.7398	1.20266	87.707	76.5579
ATP5E	20	83	74	1500.96	1248.05	1.20264	60.2735	76.5706
Hs.157349	5	16	17	27.984	23.2709	1.20253	59.6487	38.6264
Hs.293736	20	40	26	100.882	83.9084	1.20228	22.8773	30.8637
GNAI2	3	164	145	163.942	136.36	1.20227	131.043	138.153
Hs.30509	6	16	17	36.678	30.5082	1.20223	65.2502	62.3766
RECK	9	277	238	65.3128	54.3292	1.20217	132.116	107.134
Hs.5327	15	40	24	200.708	166.959	1.20214	25.5586	17.8724
YRDC	1	149	124	172.236	143.278	1.20211	185.634	145.909
HNRNPA1	12	476	413	816.57	679.295	1.20208	154.386	163.518
KMT2D	12	572	470	45.7591	38.0669	1.20207	133.821	137.211
Hs.661131	2	56	41	36.5659	30.4192	1.20207	83.8754	55.0173
ZXDC	3	269	198	44.7689	37.246	1.20198	60.4591	52.3221
Hs.724030	2	56	41	131.3	109.24	1.20195	42.2643	28.3565
Hs.537679	1	16	17	44.9197	37.3767	1.20181	56.782	41.5069
Hs.554137	14	16	17	36.0388	29.9874	1.2018	58.7899	54.9131
SOCS3	17	285	242	39.5368	32.9023	1.20164	153.016	144.503
GPD2	2	220	188	55.5718	46.2529	1.20148	165.789	175.221
NTM	11	211	173	192.312	160.064	1.20147	120.824	121.508
DTWD2	5	84	68	163.019	135.687	1.20144	222.234	161.056
NFIL3	9	99	89	67.776	56.4143	1.2014	65.766	69.8431
ARF6	14	198	163	106.132	88.3473	1.20131	148.716	157.968
Hs.301557	21	16	17	20.3945	16.9785	1.20119	51.5103	48.4118
IL32	16	115	108	28.7429	23.9292	1.20116	162.51	67.9125
Hs.580382	2	16	17	27.8907	23.2199	1.20115	43.8156	36.7989
PTPRK	6	139	121	214.179	178.317	1.20111	94.7866	96.6706
LOC149684	20	16	11	17.9879	14.9761	1.20111	34.8738	52.9275
TNFRSF1B	1	99	91	59.8477	49.8322	1.20098	59.5395	69.4952
SETD1A	16	93	83	55.5992	46.2961	1.20095	100.636	83.9249
CETN3	5	115	106	114.106	95.0141	1.20094	87.9091	81.9691
Hs.581833	4	16	17	30.0861	25.0523	1.20093	68.1173	42.9012
Hs.127008	6	16	17	26.834	22.3463	1.20082	42.59	34.9403
Hs.562608	15	16	17	18.2551	15.2033	1.20074	39.1543	27.6036
Hs.565141	18	16	17	26.5656	22.1249	1.20071	74.3564	41.006
Hs.552679	11	16	9	20.1684	16.7983	1.20062	29.1034	23.574
CCNK	14	139	115	110.291	91.8647	1.20058	101.269	104.805
FAM228B	2	84	68	107.422	89.487	1.20042	97.2165	103.878
Hs.561954	9	40	24	50.8117	42.3294	1.20039	41.03	28.872
Hs.371060	5	16	17	111.456	92.8512	1.20037	28.632	33.3591
Hs.120208	2	16	17	28.3995	23.6591	1.20036	73.8788	42.9698
Hs.581700	4	16	17	30.7854	25.6469	1.20036	53.1413	35.8814
Hs.491339	8	16	17	43.1747	35.9686	1.20034	38.6207	31.3131
Hs.522004	9	16	17	20.7673	17.3011	1.20034	49.1471	41.5151
GNAQ	9	164	145	285.253	237.675	1.20018	99.7923	98.1891
Hs.441600	19	40	24	47.4	39.4952	1.20015	69.5449	54.5995
Hs.560885	2	16	17	20.7634	17.3044	1.19989	48.1486	40.7367
Hs.575530	2	16	17	24.7964	20.6659	1.19987	43.4749	62.2222
RGS1	1	229	201	176.274	146.919	1.19981	434.553	276.976
Hs.560267	14	16	17	27.5306	22.9468	1.19976	47.0176	36.2801
LRP10	14	133	107	122.332	101.973	1.19965	68.9555	60.7177
Hs.542594	21	16	17	25.1118	20.9335	1.1996	46.6702	35.2229
PECR	2	139	113	55.9491	46.643	1.19952	94.2937	78.5504
TNAP	13	16	11	30.9169	25.7764	1.19943	36.1382	52.2176
Hs.592518	10	40	24	166.908	139.16	1.1994	35.261	35.0258
Hs.730102	11	32	18	12.6791	10.5719	1.19932	32.9371	52.7535
WDFY3	4	279	247	97.302	81.1313	1.19932	134.785	129.861
TYRO3	15	164	145	190.449	158.801	1.19929	108.09	108.865
Hs.634052	10	16	9	41.7514	34.8169	1.19917	39.4963	27.9305
Hs.233356	1	16	17	34.3489	28.6439	1.19917	60.0174	45.4686
SPNS2	17	40	26	159.988	133.432	1.19902	29.5403	36.3811
GTF3C5	9	139	115	72.9018	60.8023	1.199	77.6624	79.4211
RPE	2	152	117	79.881	66.6236	1.19899	69.6423	68.6669
CERS2	1	115	106	315.514	263.181	1.19885	48.9824	88.6215
UBN2	7	176	115	66.154	55.1827	1.19882	86.8669	77.8432
Hs.471111	11	16	17	32.3307	26.9715	1.1987	34.2807	59.9498
FOXP1	3	344	251	106.773	89.0806	1.19862	129.438	135.115
RNF145	5	148	101	153.095	127.726	1.19862	116.255	115.253
Hs.658407	7	56	41	120.619	100.633	1.1986	53.4172	66.9727
XAB2	19	93	83	93.6064	78.1037	1.19849	140.69	125.63
CHST12	7	139	113	78.2342	65.2819	1.19841	80.2818	71.8983
TMIGD2	19	68	51	67.1261	56.0146	1.19837	95.0652	95.5168
RASSF3	12	148	101	70.6202	58.9358	1.19826	103.713	95.7145
Hs.105902	4	40	24	44.2777	36.9562	1.19811	22.2583	15.7912
Hs.545469	8	16	17	37.3862	31.2044	1.19811	52.1161	30.6756
GBP2	1	99	89	120.848	100.866	1.1981	121.627	124.953
BRD2	6	229	201	172.08	143.636	1.19803	89.5928	92.821
SSC5D	19	72	62	60.7243	50.6888	1.19798	80.0346	79.7377
AZU1	19	99	89	24.3547	20.3298	1.19798	376.743	248.716
CAHM	6	40	24	49.3915	41.2324	1.19788	31.6956	14.4993
Hs.669109	1	16	17	25.3725	21.1839	1.19773	53.8618	46.3442
Hs.547920	11	16	17	29.7703	24.857	1.19766	48.0422	33.1854
P4HA1	10	167	138	87.1517	72.7681	1.19766	104.743	93.5889
PLEKHG3	14	158	141	89.1866	74.4678	1.19765	113.827	107.671
Hs.582384	5	16	17	28.1009	23.4638	1.19763	61.8518	45.5207
[truncated: 34,448 more rows]
