# Supplementary material for: Meta-Analysis of Parkinson's Disease Transcriptome Data Using TRAM Software: Whole Substantia Nigra Tissue and Single Dopamine Neuron Differential Gene Expression
Source: PLoS One. 2016 Sep 9;11(9):e0161567. doi: 10.1371/journal.pone.0161567 (PMC5017670; doi:10.1371/journal.pone.0161567)
Supplement: S4 Table — Loci are sorted in descending order. Gene Name: official gene symbol as indicated in Gene database; Chr: chromosome; Data points number of spots associated to an expression value for the locus; Expression C or D: gene expression mean value of all data point available for a locus; Expression C/D: gene expression ratio of value C/value D; SD: standard deviation of the expression value indicated as percentage of the mean. N/A: not available in the Gene database (http://www.ncbi.nlm.nih.gov/gene) when the analysis was performed. (XLS) [file pone.0161567.s004.xls]

## Sheet: S4 Table
S4 Table: List of 25,795 TRAM mapped loci for which an expression value C/D was calculated (DA neurons of PD patients vs. control DA neurons).
Gene Name	Chr	Data Points C	Data Points D	Expression C	Expression D	Expression C/D	SD as % of Expression C	SD as % of Expression D
LINC00520	chr14	10	8	208.924	20.9449	9.97495	228.812	77.8223
Hs.512440	chr8	28	25	96.5479	14.2523	6.7742	273.121	99.3584
Hs.713399	chr16	18	17	119.123	19.5051	6.10731	252.142	133.396
Hs.667725	chr11	36	34	279.421	46.6853	5.98521	198.704	119.333
Hs.554217	chr20	18	17	160.327	30.2714	5.29632	165.829	66.029
Hs.661964	chr10	18	17	68.9347	14.1305	4.87843	285.108	107.764
Hs.733282	chr10	18	17	193.177	40.1113	4.81604	277.238	147.006
MUC4	chr3	130	120	153.369	32.0754	4.78152	491.758	166.803
Hs.666920	chr10	44	43	167.856	35.6	4.71506	242.375	135.156
LYG2	chr2	18	17	84.8589	18.053	4.70055	251.163	125.754
Hs.611748	chr3	18	17	60.6248	13.8177	4.38746	208.281	107.09
MUC6	chr11	46	43	236.128	54.4207	4.33894	319.679	71.8274
Hs.291993	chr13	18	17	219.129	50.5452	4.33532	232.949	82.0313
LOC100507156	chr8	18	17	93.2011	21.8199	4.27138	238.315	70.2456
Hs.648834	chr7	18	17	54.2089	12.7861	4.23968	108.701	107.675
Hs.661390	chr10	18	17	58.8004	14.0812	4.17581	107.476	90.8901
Hs.613041	chr4	18	17	109.978	26.3443	4.17463	238.006	121.346
MLK7-AS1	chr2	18	17	24.0189	5.86284	4.0968	133.394	135.701
Hs.618995	chr12	18	17	91.5055	22.7028	4.03059	176.37	75.3779
Hs.630709	chr2	18	17	212.808	53.1032	4.00744	130.268	180.072
DEFB108B	chr11	18	17	88.2589	22.1196	3.99007	139.62	108.556
Hs.411959	chr18	18	17	64.7607	16.4538	3.9359	145.201	100.312
BRE-AS1	chr2	18	17	104.476	26.5487	3.93526	128.842	83.9193
Hs.674734	chr7	26	26	92.9793	23.6424	3.93273	260.336	72.6115
Hs.661668	chr8	18	17	78.7807	20.0418	3.93081	189.277	86.3031
FAM87A	chr8	28	25	139.263	35.5554	3.9168	267.623	110.046
GAFA3	chr4	18	17	74.6748	19.1423	3.90103	214.049	80.0805
Hs.668249	chr11	18	17	60.7956	15.5997	3.89723	138.604	118.604
TRIM54	chr2	18	17	42.5087	10.9372	3.88661	116.144	126.095
LINC00202-1	chr10	18	17	75.0071	19.5269	3.84121	97.9353	88.6129
Hs.662004	chr2	18	17	108.85	28.3775	3.83578	94.2938	79.1251
Hs.674967	chr4	18	17	72.6588	19.1676	3.7907	238.626	89.5678
SHISA7	chr19	18	17	124.065	33.5235	3.70085	125.023	66.8209
GAS2L3	chr12	18	17	80.5886	21.9957	3.66383	135.745	69.8804
Hs.658484	chr6	18	17	104.71	28.6975	3.64873	198.118	114.686
IRX2	chr5	44	43	172.808	47.6015	3.63031	287.53	146.457
Hs.216363	chr1	18	17	49.4471	13.6395	3.62528	162.984	103.739
ANKLE1	chr19	18	17	55.9367	15.4355	3.6239	80.0624	104.604
FLJ38773	chr20	18	17	70.1074	19.3984	3.61408	141.807	91.5608
Hs.711188	chr7	28	25	95.3323	26.5637	3.58882	210.367	71.4569
Hs.541185	chr19	18	17	184.684	51.5093	3.58545	194.466	71.9064
LOC100128281	chr17	10	8	73.5364	20.6536	3.56047	67.9335	80.6953
Hs.667300	chr1	36	34	181.033	50.9006	3.5566	177.173	92.5012
Hs.671168	chr17	18	17	48.6094	13.8018	3.52196	108.143	107.18
Hs.661406	chr4	18	17	75.2876	21.4822	3.50466	131.238	71.9456
Hs.669819	chr12	18	17	99.7149	28.5605	3.49135	202.87	74.6862
Hs.659026	chr17	18	17	51.0867	14.6512	3.48685	86.577	98.7877
Hs.661268	chr7	18	17	142.91	41.0446	3.48183	150.419	93.3291
FLVCR1-AS1	chr1	18	17	165.148	47.9379	3.44504	192.263	63.4284
DUSP15	chr20	10	8	102.604	29.8366	3.43888	169.846	47.9667
MIR181A2HG	chr9	18	17	96.9549	28.3145	3.42421	119.088	113.873
LOC440243	chr15	44	43	95	27.8386	3.41253	173.316	78.1496
Hs.669667	chr8	18	17	98.8823	29.0939	3.39873	123.504	98.2451
Hs.585044	chr2	18	17	72.6432	21.4317	3.38953	173.937	91.6841
DHFRL1	chr3	36	34	141.847	42.0138	3.37621	251.931	105.409
Hs.736281	chr11	18	17	1497.55	444.242	3.37102	130.81	165.58
DSPP	chr4	28	26	103.387	30.7841	3.35846	214.723	60.229
LOC100130458	chr9	18	17	59.1327	17.6774	3.34511	219.433	90.5465
Hs.602281	chr4	18	17	67.9237	20.3184	3.34297	274.294	85.4077
RANBP3L	chr5	18	17	48.8448	14.6146	3.3422	105.425	82.8329
PRDM7	chr16	18	17	83.6875	25.2	3.32093	100.643	80.1366
Hs.604697	chr1	18	17	119.902	36.2806	3.30485	92.2052	78.5242
SLC7A11-AS1	chr4	18	17	91.6477	28.0963	3.26192	195.989	68.6419
Hs.636000	chr1	18	17	59.5113	18.3653	3.24043	168.525	93.323
Hs.648496	chrX	18	17	131.001	40.4409	3.23932	198.883	82.0065
Hs.665683	chr1	18	17	81.2701	25.092	3.23888	207.953	106.542
Hs.569654	chr16	18	17	83.6313	25.8724	3.23245	159.451	142.373
Hs.659129	chr19	18	17	81.8446	25.3324	3.23082	230.43	53.942
Hs.719922	chr5	18	17	107.294	33.2574	3.22619	112.172	84.4996
NLRP7	chr19	18	17	44.6538	13.8813	3.21683	138.881	97.6591
Hs.203594	chr16	18	17	202.001	63.1925	3.1966	118.848	95.5971
CCDC38	chr12	18	17	36.647	11.4683	3.19551	135.441	121.26
LOC285000	chr2	10	8	33.5388	10.535	3.18357	116.266	140.733
Hs.659921	chr1	18	17	205.3	64.5152	3.1822	106.496	119.013
LOC100506331	chr9	26	26	191.368	60.37	3.16992	344.724	183.629
Hs.658831	chr7	18	17	80.0856	25.308	3.16443	163.971	67.8301
Hs.660218	chr20	34	35	54.6416	17.3144	3.15584	357.579	77.8059
LINC00342	chr2	28	26	130.209	41.3045	3.15241	262.449	67.0842
Hs.676664	chr22	26	26	96.7063	30.8278	3.13699	247.022	92.4647
Hs.436357	chr3	18	17	50.3048	16.0728	3.1298	204.934	101.393
Hs.729329	chr8	18	17	75.2307	24.0842	3.12365	87.4795	83.5412
MUC5AC	chr11	120	113	232.698	74.637	3.11773	352.468	117.338
BSN-AS2	chr3	18	17	56.7326	18.2431	3.10981	161.815	104.376
Hs.605323	chr7	18	17	50.0563	16.1742	3.09483	94.6569	102.842
Hs.14780	chr8	18	17	69.1393	22.3572	3.09248	182.095	64.9615
HTR3C	chr3	18	17	76.1483	24.7099	3.08169	226.869	69.9529
SSC5D	chr19	18	17	74.23	24.0946	3.08077	151.835	75.6336
Hs.656306	chr8	18	17	71.3812	23.2295	3.07287	136.407	61.4825
Hs.658407	chr7	18	17	121.871	39.7744	3.06405	191.941	75.3257
Hs.633695	chr17	18	17	27.3811	8.94394	3.06141	80.1476	132.105
FAM27E2	chr9	18	17	95.8851	31.5536	3.0388	188.313	78.4468
Hs.116150	chr13	18	17	49.1821	16.2101	3.03403	292.218	100.485
Hs.664468	chr2	26	26	79.4874	26.1998	3.03389	241.437	81.2915
Hs.650206	chr17	26	26	80.7159	26.6168	3.03251	124.033	100.175
Hs.736582	chr13	26	26	55.5377	18.3649	3.02412	191.895	80.8674
Hs.716834	chr16	18	17	86.2851	28.6212	3.01472	124.754	103.734
HSPA6	chr1	72	70	119.086	39.5931	3.00774	233.004	77.6876
Hs.598771	chr3	18	17	56.8434	18.9079	3.00633	212.511	102.205
TLCD2	chr17	44	43	66.9413	22.2813	3.00437	197.263	98.8497
SSX1	chrX	64	61	71.6163	23.8406	3.00396	264.384	58.4368
Hs.435071	chr7	18	17	90.2161	30.0651	3.0007	136.895	89.4656
Hs.663607	chr1	18	17	47.6167	15.9069	2.99347	241.194	100.91
Hs.434392	chr12	26	26	70.3807	23.5114	2.99347	137.558	105.352
Hs.659083	chr18	18	17	67.1778	22.4802	2.98831	190.435	89.9456
Hs.130213	chr3	18	17	69.8261	23.4347	2.97961	207.508	147.82
ERICH4	chr19	18	17	59.9046	20.1099	2.97886	126.839	174.202
LINC00700	chr10	18	17	112.099	37.7242	2.97154	269.277	56.3846
Hs.146250	chr5	18	17	40.7054	13.7588	2.9585	147.423	83.6088
TMEM213	chr7	18	17	72.6867	24.6025	2.95444	115.953	95.8418
Hs.127009	chr6	18	17	30.2931	10.2919	2.94338	102.037	110.922
Hs.675754	chr16	46	42	74.9161	25.4984	2.93807	170.026	118.357
Hs.636486	chr15	34	35	66.4999	22.6473	2.93633	159.858	93.2958
Hs.663991	chr21	26	26	58.5355	19.9357	2.93622	136.605	77.7092
LINC00851	chr20	18	17	68.615	23.3687	2.93619	113.829	68.6228
Hs.669119	chr19	18	17	26.7729	9.13966	2.92931	78.107	125.06
SNORA28	chr14	18	17	68.6236	23.4266	2.92931	157.758	85.2692
Hs.659084	chr2	18	17	37.3284	12.7488	2.928	102.854	115.401
Hs.673597	chr14	18	17	63.6263	21.7531	2.92494	113.58	85.2961
GALNTL5	chr7	18	17	29.2594	10.0102	2.92297	112.544	89.7349
Hs.733843	chr3	18	17	73.0734	25.0062	2.92222	108.882	70.7862
Hs.712976	chr2	18	17	14.03	4.8053	2.9197	97.312	128.441
Hs.674599	chr18	18	17	81.4051	27.9363	2.91396	155.562	106.761
Hs.657647	chr2	18	17	58.1359	19.9666	2.91166	142.069	72.5808
Hs.385813	chr21	18	17	63.5826	21.8529	2.90957	242.043	66.7327
NR2E1	chr6	28	26	150.595	51.9263	2.90017	168.053	98.6339
Hs.659093	chr2	18	17	49.6839	17.1751	2.89278	108.209	96.8666
Hs.658583	chr19	34	35	59.529	20.5881	2.89143	152.698	96.9256
Hs.496631	chrX	18	17	454.083	157.066	2.89104	121.751	109.915
Hs.660002	chr18	18	17	79.2889	27.457	2.88774	114.696	90.6335
ZNF114	chr19	44	43	81.3185	28.165	2.88721	164.212	91.0415
FAM138A	chr1	18	17	50.2932	17.4265	2.88602	120.187	111.073
TAF8	chr6	82	76	103.36	35.8968	2.87936	202.991	98.053
Hs.385614	chr7	18	17	95.0802	33.0634	2.87569	126.145	100.264
SSX4B	chrX	56	52	91.607	31.8766	2.8738	232.747	179.493
Hs.702322	chr9	18	17	92.2975	32.3559	2.85257	311.747	74.1377
Hs.661491	chr3	18	17	77.466	27.1916	2.8489	151.778	78.526
Hs.23589	chr6	18	17	44.9551	15.788	2.84741	155.41	89.812
IGSF9	chr1	18	17	42.1601	14.8137	2.84603	57.1321	88.3307
Hs.128770	chr1	36	34	61.6288	21.6973	2.84039	177.55	74.3665
Hs.433460	chr16	36	34	184.074	64.8793	2.83718	123.46	87.0614
Hs.655831	chr2	18	17	51.2522	18.0799	2.83477	126.003	107.163
Hs.665046	chr4	18	17	42.2471	14.9384	2.8281	132.866	84.5523
ANO3	chr11	28	26	87.6136	31.0567	2.82108	248.502	76.5482
Hs.745391	chr7	26	26	72.2698	25.6394	2.8187	125.569	139.339
Hs.665665	chr18	18	17	59.0523	20.9777	2.815	167.735	84.4825
PROL1	chr4	28	26	106.432	37.8181	2.81431	173.672	67.1145
Hs.669744	chr10	18	17	61.7196	21.9565	2.811	173.859	75.7244
Hs.675113	chr10	18	17	50.7017	18.085	2.80352	182.532	113.653
Hs.636703	chr15	18	17	25.7222	9.20164	2.7954	69.3272	133.493
LAMP5	chr20	28	26	187.229	67.0516	2.79231	272.713	173.124
Hs.677117	chr10	18	17	139.213	49.9207	2.78868	152.749	55.1478
PLGLB1	chr2	28	26	189.063	67.8207	2.78769	177.109	121.784
LOC100288846	chr14	18	17	40.966	14.7233	2.78239	98.0353	81.5439
Hs.624550	chrX	26	26	90.2658	32.4557	2.7812	132.625	131.716
Hs.684604	chr7	28	25	107.822	38.7886	2.77973	122.662	97.2966
LINC00669	chr18	18	17	39.3133	14.1626	2.77584	56.6355	99.7576
Hs.730964	chr20	18	17	221.08	79.6709	2.77492	125.547	174.496
OR2K2	chr9	36	34	47.7162	17.2181	2.77128	262.546	90.7737
Hs.566603	chr6	18	17	38.7485	13.9884	2.77005	73.6427	114.087
Hs.136941	chr19	18	17	41.5009	14.9946	2.76772	185.943	108.59
Hs.208219	chr17	26	26	44.948	16.2552	2.76514	180.667	100.409
ZC3H7B	chr22	148	139	951.142	344.351	2.76213	408.869	265.866
Hs.436493	chr3	18	17	41.3576	14.9914	2.75876	203.915	83.6834
Hs.729545	chr2	18	17	42.1689	15.3121	2.75397	131.831	77.9943
Hs.271955	chr5	18	17	66.0594	24.0228	2.74986	122.263	112.886
Hs.551940	chr14	18	17	35.9492	13.0849	2.74739	83.6976	103.9
LOC257358	chr5	28	25	48.9354	17.8539	2.74088	120.331	81.3711
TMEM239	chr20	28	25	42.149	15.3787	2.74074	170.581	102.841
FLJ30679	chr16	18	17	41.5173	15.1506	2.74031	79.6097	129.439
Hs.661767	chr12	18	17	58.4217	21.3387	2.73784	61.6983	77.5551
ZDHHC11	chr5	48	42	342.99	125.795	2.72657	254.788	165.869
Hs.670451	chr17	34	35	64.2208	23.589	2.72249	200.406	83.9592
ENTPD3-AS1	chr3	26	26	52.7591	19.3999	2.71956	205.497	96.6646
Hs.632934	chr11	18	17	47.2171	17.3649	2.71911	136.881	117.237
Hs.665421	chr10	18	17	93.1488	34.3471	2.71199	236.468	68.4139
TRIM73	chr7	18	17	93.2609	34.4031	2.71083	136.725	90.6148
Hs.658252	chr12	18	17	41.8878	15.4597	2.70949	155.42	92.7202
Hs.670908	chr11	18	17	61.662	22.7745	2.70751	175.482	71.3996
LOC100996255	chr15	18	17	357.157	131.939	2.70698	115.873	107.549
Hs.664828	chr22	28	25	35.4584	13.1178	2.70308	107.169	95.434
Hs.655114	chr1	18	17	242.464	89.81	2.69974	131.467	147.628
Hs.680105	chr11	18	17	61.4877	22.7917	2.69781	147.654	66.7934
Hs.661673	chr8	18	17	79.4466	29.4489	2.69778	50.017	75.8692
WDR87	chr19	18	17	59.9141	22.2384	2.69417	101.128	68.5595
Hs.671392	chr16	18	17	27.6756	10.2829	2.69141	96.1706	130.219
Hs.432394	chr8	36	34	97.7229	36.3518	2.68826	112.928	98.2275
Hs.549834	chr11	18	17	58.8574	21.9288	2.68402	90.8006	94.4304
Hs.503854	chr11	18	17	188.577	70.4155	2.67805	142.494	157.865
Hs.192729	chr8	18	17	46.6449	17.4175	2.67805	81.1389	101.808
Hs.637636	chr4	18	17	35.3035	13.1877	2.677	90.0284	114.534
Hs.735278	chr5	18	17	48.9555	18.3177	2.67258	146.431	78.0244
Hs.740867	chr2	18	17	65.6548	24.6234	2.66635	159.659	119.363
LOC401068	chr3	18	17	45.4295	17.0791	2.65995	53.9343	71.9781
Hs.657095	chr14	18	17	69.8106	26.2538	2.65907	109.244	97.2672
Hs.664097	chr18	18	17	94.3124	35.4987	2.65678	163.489	85.4957
ARRDC1	chr9	18	17	53.2927	20.1002	2.65135	68.6153	58.4597
Hs.666901	chr6	18	17	64.3553	24.2736	2.65124	129.818	85.687
Hs.661324	chr4	18	17	30.8992	11.6555	2.65103	85.2694	105.472
Hs.695417	chr3	18	17	40.8157	15.4083	2.64894	109.411	117.466
LINC00478	chr21	36	34	135.035	50.9995	2.64777	285.433	72.1364
Hs.669550	chr2	18	17	118.671	44.9187	2.6419	184.139	113.881
Hs.667630	chr15	18	17	44.761	16.9558	2.63987	124.48	94.859
Hs.680150	chr11	28	25	40.8729	15.4869	2.63919	147.641	103.884
Hs.121623	chr20	18	17	31.2951	11.8685	2.63681	117.227	117.311
Hs.655820	chr15	18	17	180.842	68.6149	2.63561	206.085	86.5751
TRDV3	chr14	10	8	69.1621	26.2507	2.63468	113.253	73.5151
Hs.673785	chr3	18	17	25.026	9.51813	2.62929	89.6518	126.794
Hs.569212	chr12	18	17	39.5119	15.0301	2.62884	154.277	93.0541
Hs.596272	chr1	18	17	54.0218	20.5649	2.62689	85.378	97.9573
Hs.674047	chr2	18	17	67.2311	25.6116	2.62502	187.401	45.8744
Hs.444612	chr4	18	17	156.297	59.6056	2.6222	117.456	226.561
DNAJB1	chr19	56	52	333.948	127.485	2.6195	217.952	101.41
NLRP4	chr19	18	17	26.8329	10.2465	2.61874	93.1705	113.352
Hs.557081	chr11	18	17	46.0543	17.6089	2.6154	88.4837	98.2102
Hs.615348	chr15	26	26	87.2804	33.4242	2.61129	204.359	79.1103
Hs.331210	chr18	18	17	33.2547	12.7363	2.61101	74.6627	86.4582
Hs.675438	chr2	18	17	47.5869	18.2516	2.60727	74.8798	88.1993
Hs.614065	chr17	18	17	42.0016	16.1276	2.60433	64.4451	79.021
Hs.661704	chr6	18	17	50.9089	19.5837	2.59956	65.8125	103.453
Hs.435762	chr14	18	17	74.7935	28.8251	2.59474	151.921	142.965
SPATC1	chr8	18	17	22.9671	8.8527	2.59436	80.264	137.915
Hs.669747	chr19	18	17	27.2024	10.4948	2.59199	57.7489	100.776
THSD7B	chr2	18	17	63.9601	24.7206	2.58732	160.63	83.6985
Hs.730090	chr1	18	17	104.902	40.5522	2.58684	166.32	87.9548
LOC100128644	chr3	18	17	59.7197	23.1084	2.58433	107.577	72.3367
Hs.655072	chr22	18	17	97.7565	37.8347	2.58377	107.876	69.9339
Hs.604376	chr2	18	17	135.854	52.6001	2.58278	102.854	97.0341
Hs.656773	chr4	18	17	43.0816	16.6816	2.58259	58.4253	94.4384
Hs.143707	chr1	18	17	113.461	43.9506	2.58156	109.558	87.7965
Hs.129735	chr1	8	9	58.2222	22.6186	2.57408	118.945	73.6117
Hs.665355	chr13	18	17	55.8034	21.6802	2.57394	113.209	79.197
Hs.678603	chr1	18	17	137.927	53.5962	2.57344	270.74	82.2421
Hs.670158	chr12	18	17	37.8997	14.7454	2.57027	236.359	123.565
SIGLEC15	chr18	28	26	174.936	68.1406	2.56728	186.583	58.5437
Hs.369935	chr15	18	17	21.0564	8.20737	2.56555	85.0525	122.088
Hs.610994	chr19	18	17	43.6223	17.0061	2.56509	173.412	78.5836
Hs.660264	chr21	36	34	88.3868	34.515	2.56083	237.178	136.533
Hs.658335	chr11	18	17	40.2175	15.7317	2.55645	95.8707	67.6866
Hs.670418	chr7	18	17	150.375	58.8237	2.55638	182.559	210.971
Hs.677669	chr10	36	34	70.0726	27.4238	2.55517	134.891	91.1019
SNORD8	chr14	36	34	79.1481	30.9999	2.55318	193.874	89.1861
Hs.664803	chr7	18	17	63.5913	24.9106	2.55278	105.372	81.2101
Hs.664628	chr17	18	17	42.9286	16.8255	2.5514	127.9	93.2627
Hs.659749	chr19	44	44	175.652	68.8875	2.54985	177.23	185.136
FAM200A	chr7	52	52	65.8122	25.8157	2.54931	211.516	89.9408
TMIGD2	chr19	34	35	71.536	28.0731	2.5482	157.13	66.9755
Hs.652616	chr3	18	17	110.263	43.2838	2.54745	189.053	75.6933
HOXB4	chr17	18	17	38.8324	15.2509	2.54624	112.772	94.6541
Hs.665432	chr2	18	17	91.2747	35.8595	2.54534	156.811	54.9342
Hs.178949	chr8	8	9	25.7948	10.1366	2.54473	74.6752	100.723
Hs.196042	chr3	18	17	23.589	9.29232	2.53855	76.7635	123.943
PRR20B	chr13	18	17	42.1091	16.5884	2.53847	57.2765	90.9097
ODF3L1	chr15	18	17	37.3809	14.7284	2.53801	71.0952	148.515
Hs.655984	chr16	18	17	52.3522	20.6296	2.53773	138.644	129.421
TUSC7	chr3	28	25	63.4347	25.0027	2.53711	306.616	106.115
Hs.17892	chr15	18	17	63.2333	24.9318	2.53625	84.6927	89.792
Hs.664979	chr6	18	17	46.4005	18.2976	2.53588	79.2054	102.502
Hs.632926	chr1	18	17	44.8801	17.7149	2.53347	55.554	107.362
LOC142937	chr10	18	17	33.5437	13.2644	2.52885	104.091	115.558
Hs.721152	chr3	18	17	62.6823	24.8262	2.52484	204.675	78.8972
Hs.655906	chr11	18	17	135.076	53.5994	2.52011	198.559	143.755
MLLT4-AS1	chr6	28	26	92.0217	36.5607	2.51696	213.188	43.5742
Hs.657565	chr20	18	17	42.4525	16.8791	2.5151	163.545	121.939
ADAMTS17	chr15	46	42	65.3975	26.0398	2.51145	322.86	64.1571
TRIM51	chr11	18	17	51.2499	20.4068	2.51141	112.04	80.584
Hs.571218	chr7	18	17	62.9118	25.0534	2.5111	161.272	92.6655
ZBTB2	chr6	18	17	195.211	77.8763	2.50668	261.971	143.01
Hs.663335	chr2	18	17	42.8884	17.1218	2.5049	160.63	107.459
Hs.633361	chr6	18	17	183.187	73.1581	2.50399	122.323	103.547
Hs.660202	chr15	18	17	133.771	53.4848	2.50111	57.9583	125.318
Hs.129417	chr3	18	17	29.6174	11.8417	2.50111	59.7554	105.373
Hs.674468	chr11	18	17	98.0381	39.1995	2.501	142.191	115.407
Hs.713084	chr11	18	17	93.5057	37.4103	2.49946	141.596	117.952
Hs.446623	chr19	28	26	105.095	42.0638	2.49846	173.609	60.0291
LOC100130232	chr8	18	17	80.178	32.1178	2.49637	90.8553	109.835
P2RY8	chrX	18	17	111.475	44.6809	2.49491	119.409	171.752
LOC728061	chr9	18	17	150.442	60.359	2.49246	165.309	86.0528
Hs.149244	chr17	28	25	81.1805	32.571	2.49241	119.681	142.271
Hs.444580	chr14	18	17	115.356	46.32	2.49041	288.862	153.977
LOC100190986	chr16	36	34	103.405	41.532	2.48978	120.525	76.2922
C20orf197	chr20	18	17	59.4652	23.8843	2.48972	157.491	105.591
Hs.745342	chr18	18	17	41.4172	16.6583	2.48629	99.3165	86.7663
Hs.562978	chr2	18	17	56.5787	22.7577	2.48614	116.541	70.6862
Hs.703727	chr11	42	44	122.513	49.3009	2.48501	301.071	86.3887
Hs.660626	chr20	18	17	71.5544	28.8309	2.48187	96.2003	74.0528
Hs.659786	chr12	18	17	85.8653	34.6587	2.47746	104.836	56.0645
MYRFL	chr12	18	17	51.3199	20.7206	2.47676	65.2467	84.4082
Hs.729580	chr10	18	17	39.9639	16.137	2.47653	141.19	104.132
Hs.665157	chr2	18	17	62.2419	25.1376	2.47605	169.668	92.87
Hs.535227	chr1	18	17	32.8011	13.2499	2.47558	73.6067	103.831
Hs.658565	chr6	42	44	39.9531	16.1429	2.47496	174.995	94.6891
Hs.639477	chr2	18	17	65.6382	26.544	2.4728	140.905	76.2039
BCDIN3D	chr12	18	17	50.1634	20.2914	2.47216	71.3435	91.614
Hs.655847	chr5	18	17	79.1715	32.0298	2.47181	128.422	66.5293
Hs.676087	chr17	18	17	35.8484	14.5064	2.47121	203.527	126.61
Hs.385663	chr12	18	17	57.5157	23.2755	2.47108	111.463	87.174
TEFM	chr17	46	43	133.209	53.9084	2.47103	231.661	58.5708
LOC100288069	chr1	28	26	725.161	293.765	2.46851	144.154	193.633
Hs.659578	chr13	18	17	86.7257	35.1403	2.46798	183.577	97.0844
Hs.729582	chr13	18	17	117.027	47.4611	2.46575	152.366	52.918
Hs.658729	chr7	18	17	46.568	18.9182	2.46154	84.251	84.4457
PHEX-AS1	chrX	18	17	60.9435	24.7788	2.4595	100.291	77.1806
Hs.658232	chr5	18	17	110.169	44.8851	2.45448	162.054	127.927
Hs.721243	chr11	18	17	40.2987	16.4198	2.45427	71.8838	86.9715
Hs.658740	chr6	18	17	104.997	42.8138	2.45241	158.162	118.132
Hs.656663	chr2	28	26	187.358	76.4563	2.45053	209.779	168.155
C14orf180	chr14	44	43	63.2629	25.8201	2.45014	193.08	101.808
NPIPB15	chr16	20	17	67.2246	27.4469	2.44926	109.799	59.4452
C19orf18	chr19	18	17	37.018	15.1142	2.44922	76.2993	102.236
Hs.658362	chr4	18	17	57.299	23.417	2.4469	82.019	73.2249
Hs.735888	chr3	18	17	46.2549	18.9042	2.4468	119.935	110.102
MGC34800	chr16	18	17	23.3747	9.55913	2.44527	69.8765	79.3086
GLB1L3	chr11	36	34	53.2674	21.7929	2.44425	118.746	87.2238
Hs.599228	chr1	18	17	21.1867	8.6822	2.44025	70.275	119.378
LINC00307	chr21	18	17	28.5487	11.7039	2.43924	64.6676	87.5026
Hs.667035	chr7	18	17	77.3404	31.7207	2.43817	161.737	60.9348
Hs.638929	chr1	18	17	31.4017	12.8968	2.43483	69.3604	69.9978
Hs.555130	chr11	18	17	48.7534	20.032	2.43377	63.0426	82.6644
Hs.506258	chr3	18	17	101.667	41.818	2.43117	152.711	56.9241
Hs.658895	chr10	18	17	57.9585	23.8487	2.43026	87.9372	130.259
Hs.633900	chr2	18	17	45.3164	18.648	2.43009	72.9444	76.5889
TEX101	chr19	18	17	27.9869	11.5245	2.42847	82.3089	99.641
Hs.597557	chr1	18	17	112.477	46.3217	2.42817	84.0334	56.4288
ZNF543	chr19	18	17	83.1888	34.2786	2.42685	132.787	77.4309
Hs.660769	chr19	18	17	49.4322	20.382	2.42529	71.5119	85.3239
Hs.650046	chr11	18	17	57.2525	23.6184	2.42406	61.8751	73.7916
SAMD3	chr6	36	34	55.0218	22.7145	2.42232	200.849	87.9131
CXCR4	chr2	92	87	260.419	107.583	2.42065	383.992	322.717
Hs.667558	chr1	18	17	99.4068	41.1203	2.41746	177.411	92.5156
Hs.635556	chr2	18	17	29.2223	12.0884	2.41739	127.89	114.612
GBP4	chr1	36	34	54.5936	22.5893	2.41679	222.367	88.2109
Hs.673190	chrX	18	17	54.8696	22.7039	2.41675	170.739	69.7825
Hs.253594	chr8	8	9	320.84	133.066	2.41112	155.663	121.731
Hs.478363	chr3	18	17	77.8517	32.3155	2.40911	161.014	99.5639
Hs.666028	chr4	18	17	25.3945	10.5443	2.40837	91.4316	138.658
NIPAL1	chr4	52	52	102.423	42.5297	2.40827	172.845	145.66
Hs.365071	chr12	18	17	84.3525	35.0351	2.40766	91.0462	83.2799
Hs.22495	chr8	18	17	34.5026	14.3305	2.40763	110.274	77.9192
Hs.465783	chr1	26	26	47.1212	19.5938	2.4049	126.505	86.9207
MIR497HG	chr17	18	17	84.6101	35.2125	2.40284	98.0415	73.9769
Hs.658678	chr5	18	17	160.027	66.6173	2.40218	106.904	49.3133
LOC100996902	chr2	18	17	77.5751	32.3108	2.4009	115.265	135.809
LOC100288860	chr19	18	17	49.3415	20.5548	2.40049	116.781	85.7305
Hs.638942	chr12	18	17	52.6966	21.9636	2.39927	150.726	96.2079
CNBD1	chr8	28	25	49.0728	20.4567	2.39886	247.43	99.951
Hs.655784	chr17	18	17	60.2282	25.1485	2.3949	67.1047	91.3194
Hs.677790	chr12	18	17	143.608	59.9686	2.39473	125.507	98.0421
Hs.634037	chr7	18	17	72.4435	30.2699	2.39325	115.669	51.721
Hs.662501	chr12	18	17	56.0183	23.4123	2.39268	72.0145	95.2883
ZNF160	chr19	100	94	1620.13	678.436	2.38804	311.136	239.671
XAGE1D	chrX	28	26	78.6244	32.9273	2.38782	127.205	59.1427
Hs.579262	chr17	18	17	58.527	24.5453	2.38444	127.162	83.9915
EVA1A	chr2	18	17	37.4446	15.7062	2.38407	173.209	88.7869
Hs.664330	chr12	18	17	74.7195	31.3511	2.38331	130.724	87.471
Hs.602654	chr1	18	17	30.7046	12.8897	2.3821	66.6161	81.1172
BCL2L12	chr19	18	17	60.248	25.3025	2.38111	77.5321	104.26
LOC100240735	chr12	10	8	113.195	47.5489	2.3806	101.245	39.362
Hs.659630	chr3	18	17	130.155	54.7624	2.37672	95.6504	135.235
Hs.593807	chr8	18	17	55.1263	23.1959	2.37656	115.365	82.8048
Hs.257368	chr10	18	17	55.2489	23.2622	2.37505	147.341	78.6638
Hs.268606	chr17	18	17	65.1336	27.4455	2.3732	131.665	66.9883
Hs.661954	chr8	18	17	28.3297	11.9405	2.37257	102.628	97.3838
Hs.256080	chr7	18	17	52.0981	21.9874	2.36945	161.046	90.2583
Hs.677323	chr2	36	34	61.6886	26.0452	2.36852	167.878	150.768
LINC00620	chr3	18	17	50.5354	21.3372	2.36841	189.646	76.5737
Hs.434806	chr2	26	26	35.2372	14.8785	2.36833	171.526	95.5331
Hs.734956	chr3	18	17	48.8715	20.6376	2.36808	90.8655	101.539
Hs.733796	chr2	18	17	38.9783	16.4631	2.36761	101.1	83.493
Hs.680066	chr15	18	17	42.7251	18.0789	2.36326	100.595	92.8901
LINC00658	chr20	18	17	48.0517	20.3505	2.3612	66.2602	100.599
LINC00858	chr10	18	17	23.6001	9.99599	2.36096	88.1816	126.212
Hs.668876	chr1	18	17	51.0262	21.6299	2.35905	83.7232	79.2529
GAPT	chr5	18	17	26.3756	11.1962	2.35577	90.2178	93.7093
Hs.118526	chrX	8	9	41.5493	17.6625	2.3524	51.8176	48.4958
SUSD2	chr22	36	34	102.946	43.7918	2.35081	263.83	126.897
Hs.666722	chr16	18	17	26.2279	11.1585	2.35048	114.575	109.304
KLHL6	chr3	46	42	47.7788	20.3278	2.35041	151.712	75.4374
Hs.605998	chr12	52	52	67.8311	28.8827	2.3485	148.702	131.379
Hs.633359	chr7	18	17	25.5369	10.8845	2.34617	94.6532	110.215
Hs.658296	chr4	18	17	135.782	57.8824	2.34582	125.176	124.529
Hs.657846	chr3	26	26	47.2582	20.1463	2.34575	138.772	87.1243
GABRR3	chr3	18	17	40.0811	17.0897	2.34534	66.4337	63.425
C8orf74	chr8	28	25	46.1512	19.6825	2.34479	105.171	79.1177
Hs.657800	chr8	18	17	40.2556	17.177	2.34358	137.441	92.9846
Hs.658519	chr10	18	17	42.1269	17.9976	2.3407	80.7711	101.756
SSX4	chrX	28	26	106.106	45.3527	2.33958	242.967	70.7525
Hs.607775	chr2	18	17	97.6355	41.8353	2.33381	178.92	161.411
Hs.658686	chr4	18	17	35.3022	15.1276	2.33363	65.4272	93.9892
Hs.667568	chr9	18	17	57.5653	24.7122	2.32942	131.789	93.4823
LOC101060553	chr13	18	17	39.5571	16.9819	2.32937	70.358	80.4534
Hs.407557	chr8	18	17	35.9831	15.4748	2.32527	61.1682	83.0043
ABI3	chr17	18	17	56.9195	24.5052	2.32276	62.1453	62.0516
Hs.656576	chr8	18	17	47.9364	20.6549	2.32083	85.0991	89.2034
Hs.654937	chr12	18	17	59.5111	25.644	2.32067	204.592	64.2442
Hs.327170	chr2	18	17	54.0528	23.3021	2.31966	82.8005	119.592
Hs.737351	chr20	18	17	44.6956	19.2847	2.31767	89.0743	109.625
Hs.296529	chr19	26	26	41.7723	18.0371	2.3159	97.9391	85.1258
LOC100507630	chr2	20	17	76.3591	32.9733	2.31578	148.665	72.0412
Hs.741724	chr8	88	88	61.5278	26.5802	2.3148	173.943	85.4144
CASP16	chr16	18	17	71.4834	30.8925	2.31394	62.2539	68.2248
Hs.657419	chr13	18	17	99.3666	42.9542	2.31331	132.051	88.4514
Hs.292063	chr12	18	17	54.0462	23.3936	2.3103	202.669	77.3085
ADAMTSL5	chr19	18	17	38.3953	16.622	2.30991	76.4215	104.632
DDIT4	chr10	28	26	550.482	238.342	2.30963	164.262	119.507
C8orf31	chr8	18	17	44.4991	19.2712	2.3091	106.885	72.776
Hs.657684	chr4	18	17	90.2778	39.0979	2.30902	121.432	166.567
Hs.735727	chr5	18	17	68.2925	29.5904	2.30792	177.07	88.9473
Hs.662955	chr12	18	17	92.4764	40.1549	2.30299	99.4586	104.374
PCDHB9	chr5	18	17	80.5214	34.9692	2.30264	105.43	135.231
AQP12A	chr2	18	17	45.2378	19.6564	2.30142	74.9243	86.2382
Hs.674772	chr19	18	17	51.1144	22.2344	2.29889	137.593	126.374
SERPINB11	chr18	18	17	55.4721	24.1424	2.2977	156.574	73.5479
FAM157A	chr3	18	17	268.461	116.848	2.29752	121.597	152.407
Hs.129003	chr15	8	9	36.5484	15.9116	2.29696	48.7778	86.2307
Hs.657988	chr7	18	17	39.8962	17.3718	2.29661	65.2841	55.0422
Hs.663957	chr5	18	17	140.681	61.2703	2.29608	93.277	85.8356
LINC00684	chrX	18	17	22.185	9.66504	2.29539	113.886	116.775
Hs.323560	chr1	8	9	31.1763	13.5945	2.29331	68.1646	87.841
LINC00705	chr10	18	17	46.3366	20.2388	2.2895	73.8072	102.974
LOC100507634	chr1	28	25	41.5636	18.188	2.28522	270.561	96.681
Hs.666775	chr21	18	17	33.8461	14.8163	2.28438	143.341	81.4536
Hs.661465	chr12	18	17	70.2903	30.7782	2.28377	82.1991	73.8164
Hs.696420	chr7	34	35	96.5619	42.3011	2.28273	245.142	262.478
GLYATL2	chr11	18	17	53.4258	23.4184	2.28135	49.6082	102.052
Hs.657596	chr1	18	17	73.4061	32.1927	2.28021	123.831	131.115
Hs.745140	chr17	18	17	47.1061	20.6685	2.27912	96.5612	65.723
Hs.431926	chr4	18	17	90.0853	39.536	2.27856	128.601	137.077
Hs.624309	chr1	18	17	63.1029	27.7024	2.27789	95.4009	77.611
Hs.661175	chr9	18	17	108.983	47.861	2.27708	91.0455	186.492
LIMS3	chr2	18	17	38.9914	17.1266	2.27666	49.019	86.2488
Hs.664379	chr1	18	17	68.5079	30.1197	2.27452	140.87	68.9727
FAM85A	chr8	18	17	242.61	106.704	2.27367	122.872	39.4848
KIR3DL3	chr19	20	17	97.9039	43.0723	2.27301	190.717	50.3882
Hs.560731	chr4	18	17	57.225	25.1764	2.27296	85.1761	72.6963
Hs.263832	chr3	18	17	52.5261	23.1266	2.27124	103.2	83.4563
Hs.660063	chr3	18	17	51.9852	22.8984	2.27025	122.5	89.6303
CT45A3	chrX	18	17	71.0123	31.3313	2.2665	202.414	188.77
Hs.672238	chr13	18	17	81.1951	35.826	2.26638	95.9629	122.89
Hs.670691	chr4	18	17	47.762	21.0853	2.26518	135.066	68.0331
Hs.28773	chr20	18	17	58.1809	25.6929	2.26447	146.943	55.4402
Hs.614167	chr2	18	17	29.4072	12.9903	2.26378	54.1033	110.673
AGBL1	chr15	18	17	61.0314	26.9655	2.26332	86.5227	62.7894
Hs.662589	chr1	18	17	88.6424	39.2224	2.25999	146.084	211.657
LRRC37A2	chr17	42	44	62.9089	27.84	2.25966	215.466	78.6337
Hs.741279	chr7	18	17	124.937	55.2982	2.25933	77.0611	71.7187
Hs.602645	chr17	18	17	46.0447	20.3947	2.25768	64.0138	86.6402
Hs.158851	chr17	18	17	109.757	48.6222	2.25735	94.3891	48.1885
Hs.680129	chr13	18	17	44.5671	19.7544	2.25606	65.0965	62.9118
Hs.666907	chr11	36	34	131.068	58.0995	2.25592	168.342	83.4555
Hs.659784	chr8	18	17	133.071	59.1247	2.25069	82.6958	69.3802
Hs.674576	chr1	18	17	35.0219	15.5712	2.24914	108.731	80.9267
Hs.9887	chr15	18	17	48.6271	21.6283	2.24831	79.0805	82.2866
RASEF	chr9	98	94	1591.82	708.991	2.24519	239.662	306.043
Hs.674246	chr4	18	17	43.0318	19.1692	2.24484	85.2971	85.4081
Hs.514527	chr17	18	17	55.2929	24.6464	2.24345	135.177	78.3114
Hs.660203	chr2	18	17	42.9202	19.1397	2.24247	105.01	97.2297
FOXR2	chrX	18	17	44.8072	19.9814	2.24244	127	138.37
RXFP2	chr13	18	17	34.6743	15.4637	2.24231	71.1498	81.7495
Hs.596475	chr5	54	51	92.0045	41.0321	2.24226	200.27	85.8864
Hs.655786	chrX	18	17	46.3436	20.6694	2.24214	124.027	73.2762
LOC645261	chr5	18	17	52.8103	23.5585	2.24167	108.713	70.8631
Hs.635363	chr5	18	17	30.3371	13.5469	2.23942	92.2721	84.6035
MGAT4C	chr12	28	26	58.5284	26.1495	2.23822	102.794	47.4746
FKSG29	chr13	18	17	29.0988	13.0048	2.23754	97.5265	96.7069
Hs.290255	chr10	18	17	45.6499	20.4165	2.23594	166.781	105.2
Hs.662384	chr9	18	17	48.5729	21.7377	2.2345	84.6552	75.6236
Hs.660616	chr19	46	42	44.9061	20.1005	2.23408	113.82	84.5133
Hs.157106	chr9	8	9	37.7068	16.8808	2.23371	70.9145	101.126
Hs.592759	chr5	18	17	34.0939	15.2727	2.23235	86.8552	107.853
Hs.664045	chr11	18	17	52.7125	23.6169	2.23198	159.416	89.4026
ZNF296	chr19	18	17	36.7193	16.4566	2.23129	59.8193	86.5085
Hs.258941	chr2	18	17	64.4725	28.8956	2.23122	178.226	80.281
TAAR9	chr6	18	17	39.1006	17.5275	2.23082	101.404	63.168
Hs.674648	chr5	18	17	73.614	33.0137	2.2298	85.6022	135.492
Hs.658005	chr2	34	35	58.912	26.4258	2.22933	158.261	166.357
Hs.655764	chr3	18	17	37.8683	16.9913	2.2287	110.392	76.0606
LINC00845	chr10	18	17	48.4879	21.7585	2.22846	133.357	77.4204
Hs.733485	chr11	18	17	71.1726	31.9679	2.22638	119.43	61.0105
Hs.603759	chr8	44	43	137.311	61.7153	2.22492	165.862	203.291
GRHL2	chr8	28	26	98.4067	44.2869	2.22203	181.691	109.093
FLJ31356	chr2	18	17	35.9655	16.1867	2.22191	137.107	67.8352
PRNT	chr20	18	17	29.7929	13.409	2.22185	87.9171	90.3651
Hs.596038	chr19	18	17	41.1072	18.5078	2.22107	202.942	96.5523
Hs.99691	chr4	18	17	66.847	30.1266	2.21887	111.675	96.805
Hs.517094	chr20	18	17	59.6926	26.9059	2.21857	216.357	109.251
LOC150051	chr21	18	17	25.71	11.5973	2.21689	71.4476	112.454
MYCBPAP	chr17	36	34	29.1481	13.1483	2.21687	70.7406	105.983
SOHLH1	chr9	18	17	136.007	61.363	2.21643	223.554	71.964
LHX8	chr1	18	17	39.0205	17.6052	2.21642	147.641	80.7942
Hs.656381	chr8	18	17	36.4665	16.453	2.2164	174.29	103.223
LOC100129447	chr12	18	17	81.9912	37.0006	2.21595	62.7146	98.56
Hs.662479	chr17	18	17	82.4566	37.2228	2.21522	76.8906	86.4235
Hs.617749	chr2	18	17	42.855	19.3515	2.21456	47.6872	65.0062
Hs.661118	chr13	52	52	79.1036	35.7209	2.21449	264.198	184.933
PGF	chr14	64	61	1377.49	622.04	2.21448	224.717	204.353
Hs.224189	chr11	18	17	24.4897	11.0636	2.21354	109.225	115.828
Hs.737950	chr2	18	17	86.4413	39.0566	2.21323	156.438	53.6849
TMEM241	chr18	36	34	1972.25	891.301	2.21278	106.704	160.541
Hs.438233	chr14	18	17	45.511	20.5676	2.21275	101.693	83.0226
Hs.591091	chr9	18	17	49.7511	22.4944	2.21171	130.298	73.5463
Hs.737968	chr2	18	17	63.1508	28.5532	2.21169	77.0393	80.1143
Hs.677186	chr18	18	17	72.6726	32.866	2.21118	90.4314	59.0988
H2BFM	chrX	18	17	14.4674	6.54304	2.21112	87.6787	125.406
Hs.665002	chr6	18	17	47.0195	21.2679	2.21083	93.3989	80.8236
Hs.700830	chr4	18	17	35.7563	16.1742	2.2107	125.284	86.2482
Hs.649593	chr5	18	17	44.8023	20.2704	2.21023	87.3921	92.6911
Hs.664708	chr14	18	17	87.3838	39.5569	2.20907	114.707	69.3021
Hs.731746	chr2	18	17	98.336	44.5428	2.20767	84.9471	144.871
NXPH4	chr12	28	26	113.252	51.3126	2.2071	185.614	53.2587
Hs.644804	chr14	18	17	39.7111	17.9991	2.20628	79.8191	112.787
STAG3L3	chr7	72	69	71.2563	32.2991	2.20614	190.06	54.6159
IRGM	chr5	18	17	30.3338	13.7568	2.205	94.4407	99.8914
TEX38	chr1	18	17	23.9488	10.8674	2.20373	86.4161	132.276
Hs.112143	chr5	26	26	31.7992	14.4386	2.20237	94.1955	107.642
SNX22	chr15	54	51	72.1481	32.7642	2.20204	176.538	136.377
Hs.661277	chr9	18	17	79.805	36.2616	2.20081	156.905	84.3989
Hs.651698	chr14	18	17	43.0099	19.5478	2.20025	100.033	106.651
LOC728114	chr12	18	17	23.0303	10.4679	2.20009	87.8208	117.736
KCNK4	chr11	18	17	25.4866	11.5864	2.1997	65.7265	152.042
LINC00544	chr13	18	17	31.8842	14.5006	2.19882	85.8462	87.6337
CARD11	chr7	18	17	48.049	21.8667	2.19736	114.874	77.6623
CREG2	chr2	18	17	141.216	64.2894	2.19657	144.975	74.8711
Hs.724207	chr18	18	17	63.1421	28.7656	2.19505	97.0508	64.7925
Hs.659765	chr2	62	60	71.0897	32.3893	2.19485	165.802	145.457
NUPR1	chr16	44	44	118.652	54.0847	2.19381	167.202	78.3249
Hs.662601	chr4	18	17	23.0157	10.4915	2.19376	105.62	145.602
FER1L5	chr2	18	17	27.3191	12.4547	2.19347	55.4625	101.212
Hs.679455	chr4	18	17	34.0928	15.5439	2.19333	81.5728	110.078
XAGE3	chrX	26	26	40.7997	18.6167	2.19156	162.342	114.203
TRIM41	chr5	18	17	252.437	115.202	2.19126	172.21	138.338
Hs.668675	chr11	18	17	77.5524	35.4157	2.18978	145.644	103.385
Hs.639142	chr17	34	35	35.6382	16.2787	2.18925	107.719	105.382
Hs.710550	chr1	18	17	54.92	25.0971	2.1883	90.8169	67.5779
Hs.666126	chr1	18	17	143.565	65.6115	2.1881	134.946	85.6238
Hs.367827	chr8	18	17	39.8985	18.2348	2.18804	162.34	95.7131
Hs.137274	chr19	18	17	47.0451	21.5042	2.18772	134.477	83.8145
Hs.671475	chr6	18	17	34.213	15.6403	2.18749	72.062	82.1027
Hs.563551	chr8	18	17	29.4196	13.4531	2.18683	105.782	107.677
LINC00487	chr2	18	17	39.8375	18.2259	2.18576	83.3433	87.7736
Hs.655715	chr17	18	17	92.1145	42.1445	2.18568	100.71	68.5141
Hs.736258	chr15	18	17	38.9704	17.8308	2.18557	95.9398	102.607
Hs.105575	chr10	18	17	61.1847	27.996	2.18548	182.101	70.386
LOC100130452	chr2	18	17	34.0622	15.5861	2.18543	100.505	105.625
Hs.664845	chr1	18	17	39.0785	17.8823	2.18532	218.217	72.7069
Hs.658555	chr9	18	17	53.6434	24.5544	2.18468	167.826	99.6966
Hs.662007	chr22	18	17	66.8424	30.6022	2.18423	113.956	86.6044
POLR2J2	chr7	26	26	71.8721	32.9132	2.18368	84.5633	62.6092
Hs.666650	chr8	28	25	40.5638	18.5771	2.18354	101.458	83.1131
SOX21-AS1	chr13	18	17	44.8246	20.5456	2.18171	67.0354	100.566
TSPAN16	chr19	28	25	40.3464	18.4957	2.1814	101.474	79.325
KRTAP1-5	chr17	18	17	27.6607	12.6805	2.18135	62.2315	130.117
Hs.56400	chr5	16	18	40.5732	18.6033	2.18097	57.7323	84.5109
Hs.98028	chr11	18	17	111.554	51.1586	2.18055	134.419	106.272
Hs.729781	chr2	18	17	32.2736	14.8018	2.18039	54.9859	92.9333
Hs.666323	chr7	18	17	33.723	15.4742	2.17931	77.6901	73.9114
Hs.634774	chr6	18	17	49.1065	22.5542	2.17727	105.534	83.1828
Hs.385535	chr17	18	17	42.3799	19.4655	2.17718	134.262	91.8404
Hs.731761	chr2	18	17	81.0164	37.2137	2.17706	151.899	87.9463
Hs.655774	chr14	18	17	53.9869	24.7997	2.17692	104.536	67.0727
BTLA	chr3	18	17	32.2969	14.8408	2.17622	72.7617	93.5634
Hs.437130	chr1	18	17	48.4908	22.323	2.17223	94.5967	118.126
Hs.696479	chr7	18	17	36.9498	17.0127	2.1719	91.7279	108.268
Hs.86650	chr7	18	17	75.0473	34.5688	2.17096	132.113	75.9952
SLC39A12	chr10	18	17	74.9736	34.537	2.17082	113.742	87.6923
Hs.678249	chr11	18	17	88.0518	40.5638	2.1707	117.003	77.7035
Hs.146040	chr14	26	26	34.8531	16.0631	2.16976	100.171	89.5773
NOBOX	chr7	18	17	31.7624	14.6445	2.1689	71.2796	81.2676
MTMR8	chrX	28	26	48.5719	22.4056	2.16784	232.351	61.5032
Hs.484658	chr12	18	17	52.472	24.2175	2.1667	227.469	79.3589
Hs.670445	chr18	18	17	59.0937	27.2787	2.1663	112.222	101.313
TBC1D28	chr17	18	17	47.9224	22.1228	2.1662	57.6684	71.099
LOC100506405	chr2	18	17	30.0119	13.8604	2.16531	79.3496	96.4313
LOC374890	chr19	18	17	56.2535	25.984	2.16493	202.566	73.9335
Hs.656289	chr10	18	17	62.7174	28.9861	2.16371	158.219	48.0064
Hs.673517	chr12	18	17	92.638	42.8173	2.16356	97.7638	101.893
LOC399900	chr11	36	34	53.5145	24.7364	2.16339	95.4372	79.1182
SLITRK2	chrX	18	17	54.4082	25.1548	2.16294	110.533	71.5077
BPIFB1	chr20	18	17	23.973	11.0879	2.16208	54.8419	108.35
Hs.145710	chr5	18	17	76.1791	35.2463	2.16134	189.878	132.743
LY6G6F	chr6	10	8	34.3358	15.8918	2.1606	74.7633	80.8597
Hs.591763	chr5	18	17	332.649	153.993	2.16015	121.305	154.974
LINC00423	chr13	18	17	24.4173	11.3036	2.16013	122.171	108.249
Hs.656093	chr19	18	17	46.0387	21.3158	2.15984	83.7493	95.191
Hs.723524	chr20	18	17	144.782	67.0939	2.1579	137.958	170.587
LOC90834	chr22	18	17	132.039	61.1983	2.15756	111.873	92.9285
Hs.735288	chr1	18	17	66.3711	30.773	2.1568	99.1199	53.4044
Hs.666919	chr19	78	79	261.133	121.178	2.15495	154.269	121.979
Hs.655836	chr2	44	43	60.3532	28.0107	2.15465	206.292	81.2817
TIGD3	chr11	18	17	35.9958	16.7113	2.15397	100.678	88.2144
Hs.444745	chr18	18	17	38.1946	17.7419	2.15279	83.2518	85.9718
Hs.556108	chr17	18	17	46.5721	21.6466	2.15147	68.4888	83.8188
Hs.658605	chr1	52	52	35.1594	16.3438	2.15123	128.183	102.7
Hs.636574	chr20	18	17	69.221	32.1793	2.15111	151.991	85.452
SLC28A2	chr15	56	52	70.3556	32.7246	2.14993	221.321	74.1142
Hs.660585	chrX	18	17	62.9134	29.2663	2.14969	95.8841	93.9876
Hs.202388	chr16	18	17	49.0966	22.8427	2.14933	185.768	67.5673
Hs.522019	chr9	18	17	37.008	17.2263	2.14835	139.042	124.113
Hs.673013	chr7	18	17	59.6091	27.7489	2.14816	235.459	96.8923
SNORA68	chr19	36	34	55.7511	25.9556	2.14794	112.072	85.9361
C14orf183	chr14	18	17	85.0478	39.6019	2.14757	181.405	68.4246
FGF10	chr5	18	17	23.4489	10.9203	2.14727	77.5188	134.818
GPR101	chrX	18	17	22.1185	10.3011	2.1472	75.1616	99.0836
Hs.639414	chr6	18	17	34.6663	16.1549	2.14586	73.6961	115.034
Hs.563176	chr3	18	17	76.0718	35.4572	2.14546	91.5015	97.6566
Hs.540032	chr14	18	17	36.9452	17.2303	2.1442	57.6	65.3567
Hs.672920	chr9	18	17	75.6907	35.3033	2.14401	104.919	116.35
Hs.48100	chr1	18	17	182.205	85.0046	2.14348	142.547	138.688
Hs.657983	chr8	18	17	27.9078	13.0275	2.14222	72.4103	76.9534
LINC00410	chr13	18	17	81.4295	38.0241	2.14153	261.789	141.113
Hs.547620	chr3	18	17	79.3743	37.0706	2.14117	210.483	52.3756
Hs.660216	chr3	18	17	43.5412	20.3353	2.14116	141.098	83.8621
Hs.271903	chr2	18	17	49.5958	23.1663	2.14086	110.71	131.5
Hs.667785	chr16	36	34	170.79	79.7822	2.14071	174.523	140.855
Hs.598944	chr20	26	26	59.3415	27.7264	2.14026	152.664	87.8004
Hs.733886	chr6	18	17	183.349	85.6913	2.13964	148.489	112.551
Hs.58429	chr8	18	17	32.055	14.9887	2.13861	61.1575	102.841
ZMYND15	chr17	18	17	38.0884	17.8114	2.13843	49.9416	129.517
Hs.666472	chr12	18	17	66.6122	31.1572	2.13794	123.1	83.026
Hs.658187	chr1	36	34	190.705	89.2297	2.13724	138.515	107.154
LOC100507033	chr3	18	17	47.8369	22.3948	2.13607	55.0091	55.194
ZNF100	chr19	18	17	97.2768	45.5412	2.13602	88.7634	63.9881
Hs.212709	chr7	18	17	47.4346	22.2131	2.13543	107.585	101.496
GBP6	chr1	28	25	35.4309	16.5976	2.1347	67.5582	97.383
CCDC27	chr1	18	17	25.2313	11.8285	2.1331	119.684	94.3285
Hs.659886	chr6	18	17	28.6253	13.4212	2.13284	92.9749	117.01
Hs.206112	chr4	18	17	36.0077	16.8886	2.13206	102.918	117.582
ABO	chr9	108	105	83.0521	38.968	2.13129	196.724	67.5365
Hs.74115	chr1	18	17	34.1424	16.0216	2.13101	168.159	88.8267
FLJ32955	chr2	36	34	147.126	69.0588	2.13044	224.596	173.667
Hs.606162	chr8	36	34	29.8787	14.0347	2.12891	88.1185	101.554
FAM41AY2	chrY	18	17	34.6838	16.2947	2.12854	76.9677	100.862
TIGD2	chr4	18	17	67.1156	31.5336	2.12839	92.8102	103.188
Hs.632855	chr2	56	52	116.455	54.7278	2.1279	264.19	308.2
RFTN2	chr2	18	17	76.8697	36.1568	2.12601	131.736	76.6133
Hs.257168	chr7	26	26	46.1152	21.7228	2.1229	54.1938	78.9376
Hs.683386	chr5	18	17	46.1948	21.7645	2.12248	53.5589	64.365
UBE2E2-AS1	chr3	18	17	32.2099	15.1883	2.1207	72.7119	93.5897
Hs.652980	chr1	18	17	42.5411	20.0634	2.12033	69.3139	83.519
Hs.655755	chr11	28	26	95.4906	45.0542	2.11946	207.94	68.428
ITGB2-AS1	chr21	28	25	57.3074	27.0402	2.11935	150.143	74.8994
Hs.668939	chr11	18	17	34.6144	16.3406	2.1183	87.2631	91.8743
SOX9	chr17	28	26	221.621	104.664	2.11745	134.574	85.9331
Hs.434219	chr5	28	26	94.7293	44.7522	2.11675	119.554	51.3642
Hs.31542	chrX	8	9	27.7566	13.1135	2.11665	44.4417	97.4577
FAM217A	chr6	36	34	47.2623	22.3557	2.1141	128.933	103.749
EMR2	chr19	46	43	44.3187	20.9759	2.11284	261.485	83.9403
Hs.658309	chr16	18	17	33.9746	16.0829	2.11247	71.1709	110.696
Hs.605642	chr18	18	17	90.6217	42.928	2.11102	152.453	134.033
TEDDM1	chr1	18	17	49.3839	23.4371	2.10708	106.635	69.7692
KCNU1	chr8	18	17	29.5282	14.0213	2.10595	73.339	147.053
Hs.382012	chr18	18	17	29.9104	14.2084	2.10513	80.3648	119.41
Hs.560323	chr15	18	17	63.5364	30.1819	2.10511	105.184	75.7422
Hs.669007	chr2	18	17	82.4463	39.1766	2.10448	121.42	57.4051
Hs.129169	chr17	18	17	37.8595	17.9912	2.10433	45.854	88.159
GAS6-AS1	chr13	44	43	55.775	26.5083	2.10405	276.531	75.1362
Hs.658636	chr6	18	17	49.1756	23.3782	2.10348	211.866	69.8507
Hs.609090	chr15	34	35	50.2343	23.886	2.10309	188.359	88.2998
SOST	chr17	18	17	30.3866	14.4547	2.10219	177.893	89.3646
Hs.508690	chr13	18	17	40.8875	19.4538	2.10177	85.7685	86.2346
Hs.147682	chr17	18	17	33.1176	15.7682	2.10028	101.994	92.4549
Hs.670065	chr7	18	17	41.255	19.6557	2.09889	91.4276	99.8188
Hs.670298	chr2	18	17	64.5994	30.7781	2.09888	219.364	80.8953
Hs.734218	chr1	18	17	36.5494	17.4269	2.0973	145.824	99.6844
Hs.661718	chr22	18	17	46.0584	21.9729	2.09614	69.9642	66.2689
Hs.536411	chr15	18	17	79.6745	38.0141	2.09592	83.9742	83.4414
Hs.670803	chrX	18	17	20.0507	9.57044	2.09507	133.207	119.473
Hs.670077	chr11	18	17	58.5879	27.965	2.09504	106.451	109.266
LINC00607	chr2	18	17	77.1337	36.8173	2.09504	104.097	105.318
TTTY5	chrY	18	17	31.996	15.2727	2.09498	66.766	81.7426
Hs.445482	chr2	18	17	66.9099	31.9444	2.09457	226.764	43.2209
Hs.662234	chr4	18	17	35.4685	16.9376	2.09407	68.121	87.6957
Hs.674410	chr1	18	17	62.5163	29.8578	2.0938	101.231	78.7511
VIT	chr2	18	17	22.2175	10.6147	2.09308	81.4627	80.0886
SLC47A1	chr17	28	26	57.2897	27.3774	2.09259	109.908	53.8574
Hs.46473	chr3	18	17	37.9989	18.1601	2.09244	63.3412	97.5977
Hs.636851	chr12	18	17	36.3907	17.3955	2.09196	100.767	68.1641
Hs.128809	chr3	18	17	72.0904	34.4619	2.09189	109.054	105.819
Hs.609892	chr18	18	17	38.1656	18.2501	2.09125	123.563	86.2524
IL36B	chr2	36	34	39.267	18.7831	2.09055	136.11	91.283
Hs.667247	chr3	18	17	52.2612	25.0058	2.08996	207.342	130.156
Hs.727036	chr1	10	8	46.9192	22.4611	2.08891	180.973	100.431
LOC730202	chr14	18	17	50.6471	24.2585	2.08781	100.236	73.1083
SAA4	chr11	28	26	48.0659	23.0245	2.0876	176.714	81.5932
ADAM33	chr20	60	61	194.564	93.2418	2.08667	143.108	152.424
Hs.658431	chr14	18	17	61.8782	29.6604	2.08622	51.8949	76.7682
Hs.255277	chr20	18	17	53.5213	25.6662	2.08528	180.764	73.5302
Hs.659225	chr7	28	25	28.8167	13.82	2.08515	210.348	140.787
MACROD1	chr11	54	52	60.2956	28.9453	2.08309	171.622	134.84
TIFAB	chr5	18	17	36.6168	17.581	2.08275	88.5827	106.939
PNLIPRP3	chr10	18	17	40.9741	19.6782	2.08221	82.5201	72.5778
HSPB1	chr7	44	44	158.954	76.3463	2.08201	164.831	119.833
Hs.615028	chr8	18	17	67.5993	32.4686	2.08199	162.543	111.487
MZT2B	chr2	72	70	853.802	410.122	2.08183	227.973	134.018
Hs.656445	chr9	18	17	29.4494	14.1531	2.08077	64.848	107.482
Hs.675439	chr13	18	17	47.5434	22.8558	2.08015	159.364	69.0865
Hs.661695	chr7	18	17	70.1065	33.71	2.0797	79.4489	80.9183
LINC00648	chr14	18	17	44.5713	21.434	2.07946	101.327	66.5837
Hs.382317	chr9	18	17	33.779	16.2473	2.07906	79.2295	77.2547
Hs.662682	chr17	18	17	51.9016	24.9794	2.07777	158.6	76.2507
Hs.621250	chr4	18	17	75.2776	36.2322	2.07764	85.5691	73.6025
C19orf48	chr19	18	17	40.2799	19.3879	2.07758	70.2282	100.63
LOC286190	chr8	18	17	29.7472	14.3203	2.07727	94.4586	153.128
Hs.737327	chr17	34	35	105.198	50.6442	2.07721	136.847	66.3528
TDRD10	chr1	18	17	37.4695	18.0412	2.07689	45.4479	78.263
Hs.220977	chr12	8	9	56.1858	27.0598	2.07636	30.0139	69.9192
Hs.668279	chr2	18	17	91.8715	44.2601	2.07572	103.376	93.6495
Hs.732524	chr7	18	17	63.1635	30.4438	2.07476	66.8085	105.265
Hs.552684	chr13	18	17	39.5214	19.0496	2.07465	167.253	93.2666
Hs.207423	chr19	18	17	29.8157	14.3769	2.07387	56.5357	87.9347
Hs.661659	chr3	18	17	53.6671	25.8802	2.07367	50.4131	86.5476
Hs.734962	chr14	18	17	34.758	16.7645	2.0733	94.2952	92.8027
Hs.662002	chr15	36	34	60.0283	28.9768	2.0716	161.867	90.6042
BOLL	chr2	18	17	72.1101	34.8277	2.07048	186.747	66.5977
LOC100133089	chr10	10	8	38.8496	18.7648	2.07035	68.1391	72.1402
ZNF530	chr19	18	17	21.139	10.2106	2.0703	99.2554	110.535
Hs.671927	chr7	18	17	39.4567	19.0589	2.07025	71.6868	80.5618
C10orf82	chr10	18	17	32.9399	15.9112	2.07023	87.6716	83.8654
ZCCHC13	chrX	18	17	25.6421	12.3874	2.07001	77.948	84.2853
Hs.677046	chr5	18	17	67.8898	32.7974	2.06998	186.266	113.818
IGSF11-AS1	chr3	18	17	27.1947	13.1405	2.06953	67.9106	134.786
HS3ST6	chr16	18	17	23.3885	11.3028	2.06927	114.099	119.682
Hs.572830	chr20	34	35	26.6885	12.9031	2.06837	86.8106	150.828
PDILT	chr16	26	26	29.1894	14.1139	2.06813	82.0132	102.071
ACVR2B-AS1	chr3	28	26	136.992	66.2555	2.06763	133.652	131.419
Hs.658036	chr16	18	17	51.7492	25.0398	2.06668	80.5266	76.4101
HEMGN	chr9	28	25	46.3978	22.4579	2.06599	144.256	85.3331
USP44	chr12	18	17	38.7049	18.7418	2.06517	107.734	92.1249
Hs.157791	chr10	18	17	54.7159	26.507	2.0642	75.6147	72.2904
ERVW-1	chr7	36	34	86.9186	42.1424	2.0625	106.722	83.5128
LINC00551	chr13	18	17	23.4371	11.364	2.0624	150.94	124.27
Hs.655509	chr10	18	17	47.1168	22.8481	2.06217	105.927	73.8767
FLJ42351	chr2	18	17	44.4979	21.58	2.06199	182.756	116.541
Hs.677252	chr2	72	70	134.359	65.1916	2.06098	157.27	126.648
Hs.603008	chr2	18	17	100.574	48.8041	2.06077	105.675	79.8692
CRHR1-IT1	chr17	54	51	57.8613	28.0871	2.06007	177.043	70.9943
Hs.569089	chr12	18	17	32.1918	15.6272	2.05998	79.775	81.3901
Hs.657182	chr16	18	17	33.3807	16.2076	2.05958	63.2434	85.5274
Hs.662815	chr18	18	17	82.6313	40.1271	2.05924	98.8032	85.1836
Hs.652420	chr5	18	17	40.27	19.5561	2.0592	103.615	76.541
Hs.672713	chr19	18	17	42.1625	20.501	2.05661	118.638	91.5129
Hs.670871	chr1	18	17	37.5395	18.2563	2.05624	58.3223	71.4326
Hs.639112	chr18	18	17	29.0059	14.1081	2.05598	72.4389	101.699
Hs.604325	chr7	18	17	34.0807	16.5766	2.05596	57.5506	93.7727
Hs.732899	chr1	18	17	37.8925	18.437	2.05524	47.7845	102.655
Hs.633489	chr5	36	34	34.2895	16.6864	2.05494	104.385	87.6323
PGM5-AS1	chr9	18	17	57.3645	27.9251	2.05423	151.636	64.4005
Hs.610023	chr16	18	17	42.2299	20.5602	2.05396	134.02	63.5909
Hs.737385	chr1	18	17	108.707	52.926	2.05394	57.7269	59.393
SPEM1	chr17	18	17	34.5705	16.8353	2.05345	93.5769	118.567
Hs.551743	chr21	18	17	35.078	17.0841	2.05325	60.5316	94.5172
Hs.680526	chr1	28	25	917.644	446.954	2.05311	99.5476	135.37
LINC00598	chr13	70	69	52.2315	25.4459	2.05265	209.608	94.4557
Hs.665646	chr14	18	17	50.3127	24.5324	2.05087	59.754	69.7097
LINC00466	chr1	18	17	49.3891	24.0866	2.05048	61.0362	95.1508
CPNE4	chr3	36	34	53.1218	25.9089	2.05033	184.457	68.1041
Hs.213722	chr4	18	17	48.7715	23.7989	2.04932	73.7951	67.8891
SLC35G3	chr17	18	17	63.9167	31.1942	2.04899	105.396	100.056
CDRT15	chr17	18	17	55.3761	27.0309	2.04862	60.2208	62.7039
P4HA3	chr11	52	52	48.9147	23.8784	2.04849	152.18	128.197
Hs.612327	chr6	18	17	86.044	42.0052	2.04841	113.404	60.7914
Hs.611129	chr2	18	17	35.3808	17.2794	2.04757	120.798	95.8273
Hs.635771	chr20	34	35	30.5649	14.9335	2.04673	233.124	107.522
Hs.660641	chr2	26	26	190.407	93.0351	2.04662	159.075	192.242
Hs.656386	chr1	18	17	41.0058	20.0398	2.04622	105.466	78.1693
Hs.666004	chr2	18	17	51.9916	25.4297	2.04453	177.06	73.1881
AGBL4	chr1	36	34	73.713	36.0552	2.04445	141.232	127.76
Hs.665136	chr2	18	17	24.2764	11.875	2.04433	78.1124	106.145
MPV17L	chr16	26	26	288.325	141.281	2.04079	162.176	108.042
Hs.735318	chr22	18	17	33.6819	16.5071	2.04045	65.3085	83.0701
Hs.662048	chr1	18	17	57.0479	27.9634	2.04009	101.741	104.352
Hs.317713	chr12	18	17	26.9807	13.2287	2.03956	95.6663	107.353
P2RX7	chr12	28	26	42.4189	20.8023	2.03915	60.7763	90.0555
Hs.734385	chr6	18	17	44.0247	21.5948	2.03867	105.272	71.1875
Hs.559293	chr19	18	17	69.6907	34.1901	2.03833	216.146	40.2094
LOC100294145	chr6	36	35	77.7225	38.1412	2.03776	193.678	54.6666
AEBP1	chr7	28	26	216.849	106.432	2.03744	136.868	70.1971
GPHB5	chr14	18	17	41.6385	20.438	2.03731	78.0454	80.0234
Hs.675449	chr3	18	17	40.0019	19.6403	2.03672	49.0389	111.092
Hs.667736	chr1	36	34	115.377	56.6683	2.036	112.757	55.5576
ERVFRD-1	chr6	18	17	54.1977	26.6306	2.03517	106.037	66.0096
C15orf54	chr15	18	17	58.1751	28.5871	2.03501	124.129	123.62
Hs.734269	chr1	18	17	40.6777	19.9936	2.03454	72.0505	91.3135
DOK1	chr2	48	43	95.2048	46.8021	2.0342	130.063	71.3756
Hs.436137	chr6	18	17	66.7948	32.8371	2.03412	90.9237	124.278
Hs.610161	chr14	18	17	49.6367	24.4045	2.03392	62.5256	73.8757
Hs.658477	chr19	26	26	44.8949	22.0757	2.03367	43.9638	73.1039
PGLYRP3	chr1	26	26	30.0993	14.8091	2.03248	92.2559	101.419
Hs.662095	chr19	18	17	39.8294	19.6002	2.03209	71.5022	79.247
Hs.677106	chr18	36	34	51.4326	25.3156	2.03166	165.433	138.398
NEK8	chr17	36	34	89.1133	43.8662	2.03148	110.966	91.5023
Hs.603980	chr14	18	17	28.8916	14.2247	2.0311	96.8327	81.7619
FKSG49	chr5	116	113	1609.48	792.487	2.03093	135.962	159.93
Hs.655487	chr6	18	17	81.7761	40.2727	2.03056	79.1043	122.92
Hs.670752	chr3	18	17	29.6157	14.5898	2.02989	97.2183	115.924
PATL1	chr11	64	59	45.0733	22.229	2.02768	114.165	86.3907
Hs.655549	chr3	18	17	50.3592	24.8373	2.02757	64.9087	95.3599
LRRC37A	chr17	56	52	104.84	51.7456	2.02606	145.303	80.5569
TMC1	chr9	18	17	116.494	57.5016	2.02592	115.312	103.365
CA10	chr17	46	43	150.996	74.5572	2.02524	194.906	103.85
LINC00954	chr2	26	26	88.4207	43.6609	2.02517	119.668	84.6986
FAM66D	chr8	90	86	106.533	52.606	2.02512	159.972	133.491
Hs.664815	chr3	18	17	39.8778	19.6929	2.02498	99.9895	72.0844
Hs.646379	chr19	36	34	166.153	82.061	2.02475	175.734	219.157
Hs.721654	chr15	18	17	44.3468	21.9118	2.02388	46.2432	50.9796
Hs.544161	chr5	18	17	37.0783	18.3208	2.02383	85.4464	84.0332
Hs.232534	chr1	28	25	54.245	26.8046	2.02372	157.559	53.982
Hs.476604	chr3	18	17	42.844	21.179	2.02294	72.925	99.3981
MLLT6	chr17	36	34	39.3267	19.4417	2.0228	127.584	106.434
LCE3D	chr1	18	17	61.9603	30.6316	2.02276	184.46	79.3829
Hs.565600	chr2	18	17	25.4861	12.6028	2.02226	128.964	99.0854
Hs.414467	chr7	36	34	57.2582	28.324	2.02155	141.538	134.005
LOC152225	chr3	18	17	65.2649	32.2852	2.02151	87.7103	96.3471
Hs.655512	chr22	18	17	52.7063	26.0846	2.0206	107.054	52.2531
ANKRD18A	chr9	28	25	105.059	52.0169	2.01971	149.678	75.9214
Hs.600611	chr20	18	17	97.6537	48.3507	2.0197	172.521	81.561
Hs.185918	chr11	18	17	42.2465	20.9308	2.01839	189.126	75.4391
Hs.571857	chr1	26	26	349.818	173.381	2.01762	183.62	249.204
ZNF584	chr19	18	17	62.8052	31.1341	2.01725	111.693	73.3653
FCGR2A	chr1	64	60	67.2471	33.3494	2.01644	158.876	174.498
Hs.639355	chr10	18	17	31.1684	15.4575	2.0164	171.591	77.6769
LELP1	chr1	18	17	44.1439	21.8948	2.01618	87.1835	111.517
IFNG	chr12	28	26	42.778	21.224	2.01555	163.979	66.215
Hs.666766	chr16	18	17	75.2702	37.3468	2.01544	161.732	64.4012
Hs.423336	chr6	18	17	67.8674	33.6738	2.01544	99.5935	76.709
Hs.10319	chr4	18	17	44.5107	22.089	2.01506	164.815	73.0068
Hs.622766	chr6	18	17	43.373	21.544	2.01323	107.184	75.1516
Hs.698515	chr3	18	17	32.4101	16.1	2.01305	107.554	77.4459
FCRL3	chr1	44	43	39.4109	19.5782	2.013	348.819	74.0457
RIOK3	chr18	118	113	632.526	314.355	2.01214	363.615	322.591
Hs.661286	chr19	18	17	78.676	39.1106	2.01163	132.855	120.764
RPTN	chr1	18	17	29.9255	14.8809	2.011	67.7389	78.4484
Hs.679491	chr2	18	17	58.4658	29.0816	2.01041	106.511	98.6836
TTR	chr18	28	26	92.9696	46.2466	2.0103	207.644	69.1274
LOC728819	chr2	18	17	33.7755	16.8023	2.01017	93.0396	86.092
Hs.397465	chr7	28	26	206.462	102.712	2.01011	165.06	70.328
LOC100506235	chr2	8	9	24.1927	12.043	2.00886	61.3313	101.664
Hs.598168	chr19	18	17	50.4283	25.1055	2.00866	80.1289	85.5928
Hs.734467	chr17	18	17	42.2542	21.0378	2.00849	72.702	66.5845
Hs.605206	chr4	18	17	110.245	54.9315	2.00696	158.989	102.379
Hs.668955	chr5	18	17	74.1407	36.9621	2.00586	174.235	45.5412
Hs.657877	chr3	18	17	35.1767	17.5371	2.00584	128.54	74.4313
HOTTIP	chr7	28	25	45.7815	22.8255	2.00571	124.55	78.2156
Hs.655709	chr6	26	26	61.7283	30.7817	2.00536	139.322	73.4613
Hs.658839	chr14	18	17	56.9956	28.4302	2.00475	137.494	118.237
LINC00567	chr13	18	17	52.6937	26.2856	2.00466	99.4274	98.3878
RD3	chr1	18	17	39.4395	19.6779	2.00425	57.527	90.6749
CLRN1	chr3	54	51	37.6289	18.7803	2.00364	76.8623	96.6675
Hs.677228	chr12	18	17	136.898	68.3295	2.0035	152.103	138.428
Hs.609021	chr3	18	17	33.4911	16.7189	2.00319	75.8872	70.0283
Hs.147340	chr18	26	26	50.3585	25.14	2.00313	182.996	77.2662
LOC100506286	chr2	18	17	38.1877	19.0647	2.00306	131.532	100.956
Hs.572345	chr15	18	17	45.018	22.4804	2.00255	45.5454	72.3706
Hs.436721	chr1	18	17	41.9237	20.9427	2.00183	83.8196	98.7443
Hs.551837	chr1	18	17	87.5983	43.7614	2.00172	164.868	127.831
Hs.660098	chr9	18	17	27.8734	13.9299	2.00097	90.8823	97.2893
Hs.27017	chr1	18	17	109.638	54.8026	2.0006	127.225	88.5979
Hs.422318	chr19	18	17	140.228	70.1005	2.00039	141.735	113.106
USH2A	chr1	28	26	32.4766	16.2438	1.99932	50.9532	83.2214
ZSCAN29	chr15	18	17	162.396	81.2478	1.99877	127.533	58.9928
Hs.641022	chr17	26	26	33.2878	16.668	1.99711	130.056	95.1618
Hs.674001	chr14	18	17	27.0669	13.5537	1.99702	70.0776	104.304
PRR15	chr7	18	17	37.5941	18.8276	1.99675	58.7684	72.5502
Hs.446044	chr5	18	17	30.9209	15.4965	1.99535	91.6539	91.1116
MUC12	chr7	52	52	79.8277	40.0175	1.99482	250.136	85.8341
Hs.498025	chr1	18	17	28.1576	14.1185	1.99438	106.548	86.9295
GIT1	chr17	36	35	358.695	179.876	1.99412	109.867	103.312
Hs.49787	chr2	18	17	37.0018	18.5585	1.9938	79.2147	85.9871
Hs.630983	chr20	18	17	38.164	19.1416	1.99377	59.8263	93.4274
TFAP2D	chr6	18	17	77.0037	38.6332	1.9932	52.1399	56.7078
DHRS4-AS1	chr14	44	43	100.804	50.5759	1.99313	270.609	99.3508
Hs.661715	chr2	18	17	37.5096	18.8226	1.99279	68.8155	67.6849
PHYHD1	chr9	18	17	29.8555	14.9822	1.99274	78.1872	79.8938
RBP5	chr12	18	17	34.7308	17.4305	1.99254	97.5286	97.6481
FAM78A	chr9	18	17	45.564	22.8749	1.99188	74.3826	77.7385
Hs.663487	chr3	18	17	22.8117	11.4534	1.9917	73.4769	113.393
PCDHGA1	chr5	8	9	21.6305	10.862	1.99139	47.4173	127.203
MOB2	chr11	10	8	55.4506	27.8486	1.99115	59.0324	55.7702
LOC100130417	chr1	28	25	55.7754	28.0127	1.99107	148.36	69.7129
Hs.606251	chr13	18	17	30.7563	15.4478	1.99098	62.1124	99.0864
Hs.634971	chr4	18	17	49.1411	24.6823	1.99094	85.7704	70.1307
C4orf45	chr4	18	17	26.1274	13.1234	1.99091	131.032	100.258
Hs.559523	chr9	18	17	65.0173	32.6683	1.99023	123.035	109.795
Hs.655868	chr15	28	26	78.2481	39.3223	1.98992	144.282	46.7444
Hs.659023	chr2	18	17	24.5507	12.3409	1.98939	66.4858	92.5669
Hs.123352	chr18	18	17	45.427	22.852	1.98788	142.281	97.7053
Hs.600542	chr9	18	17	32.1403	16.176	1.98691	63.753	72.154
Hs.677101	chr19	52	52	55.9727	28.1772	1.98645	109.284	113.263
SERPINH1	chr11	36	35	97.6425	49.1678	1.9859	137.442	122.372
LOC100506639	chr5	18	17	38.7462	19.5137	1.9856	89.3779	84.7669
Hs.658738	chr12	18	17	76.0288	38.293	1.98545	88.6151	61.8148
MYO1G	chr7	36	34	49.9927	25.1899	1.98463	97.7854	82.2496
Hs.659207	chr20	18	17	71.9131	36.2512	1.98375	133.777	91.7104
GPR115	chr6	36	34	26.0448	13.1324	1.98325	104.473	103.729
Hs.58068	chr2	18	17	38.3382	19.3311	1.98324	98.9604	112.709
Hs.555158	chr16	28	25	48.7635	24.5899	1.98307	104.029	98.9405
HOXD4	chr2	46	43	63.31	31.934	1.98253	246.613	78.143
Hs.663373	chr18	18	17	58.8618	29.6929	1.98235	62.0826	69.025
Hs.658601	chr14	26	26	35.0406	17.6784	1.98211	143.143	81.5008
ZNF844	chr19	34	35	30.7204	15.499	1.98209	108.641	88.5332
Hs.191911	chr1	18	17	293.298	148.008	1.98164	91.2677	112.595
Hs.675461	chr19	36	34	45.2231	22.8252	1.98128	180.261	90.884
Hs.658370	chr1	18	17	54.6186	27.5705	1.98105	100.529	111.83
TTLL6	chr17	18	17	28.2174	14.2495	1.98024	72.94	96.7757
Hs.729710	chr9	26	26	27.9595	14.1197	1.98017	85.3193	91.8952
MGC50722	chr9	28	25	54.3409	27.4575	1.97909	145.988	106.61
HVCN1	chr12	18	17	42.511	21.4864	1.97851	83.002	93.061
HEXIM2	chr17	18	17	34.9545	17.6703	1.97815	70.2352	85.4841
SPATS1	chr6	18	17	32.0746	16.215	1.97809	75.3564	79.5864
Hs.674543	chr7	36	34	69.4742	35.1274	1.97778	139.449	76.1984
DSG1	chr18	28	26	42.7701	21.6558	1.97499	147.629	53.7741
Hs.439122	chr1	18	17	56.1262	28.419	1.97495	87.1871	105.81
CLDN23	chr8	46	42	47.8223	24.2276	1.97388	235.451	79.9581
Hs.664772	chr16	18	17	114.391	57.9729	1.97317	108.491	109.465
Hs.192342	chr3	18	17	46.212	23.4266	1.97263	124.321	73.0572
APOBEC4	chr1	18	17	45.1789	22.9055	1.9724	111.378	78.5488
MCHR2	chr6	18	17	41.7699	21.1865	1.97154	116.255	64.6312
Hs.665345	chr3	18	17	57.1758	29.0022	1.97143	54.8416	59.8706
Hs.673510	chr9	18	17	42.4916	21.559	1.97094	160.575	85.9068
KIRREL2	chr19	18	17	48.6539	24.6882	1.97073	113.373	85.6026
METRNL	chr17	18	17	53.9885	27.3987	1.97047	53.2566	59.2594
KRTAP4-5	chr17	18	17	24.7662	12.5694	1.97035	89.1226	95.8741
Hs.561654	chr7	18	17	39.1974	19.9007	1.96965	83.3227	108.832
Hs.657744	chr14	18	17	35.8497	18.2035	1.96939	47.0577	97.0428
C6orf201	chr6	18	17	37.5006	19.0422	1.96934	129.032	87.2717
Hs.396593	chr2	34	35	174.746	88.7418	1.96915	189.102	250.307
Hs.663289	chr15	18	17	43.1513	21.9191	1.96866	53.6777	59.3316
LOC100505501	chr8	18	17	53.1656	27.0064	1.96863	224.254	91.9613
CHORDC1	chr11	28	26	288.358	146.517	1.96809	165.731	87.7979
WDFY2	chr13	44	43	46.6897	23.7345	1.96716	80.2175	87.542
Hs.634955	chr12	18	17	80.1182	40.736	1.96676	123.165	90.427
GOLIM4	chr3	64	61	118.365	60.1891	1.96655	193.293	117.658
DAPK1-IT1	chr9	18	17	49.3588	25.1123	1.96552	120.764	84.8475
Hs.660660	chr16	36	35	43.6642	22.2288	1.9643	115.274	91.1038
Hs.636821	chr5	18	17	58.4686	29.7665	1.96424	132.3	70.2895
Hs.734595	chr3	18	17	54.6442	27.8338	1.96323	137.87	81.8112
Hs.733962	chr1	18	17	39.1742	19.9563	1.963	81.8619	80.4953
Hs.255491	chr3	26	26	40.0664	20.4274	1.96141	77.4378	84.0859
Hs.666082	chr17	18	17	27.5086	14.0326	1.96033	98.2851	109.763
Hs.670303	chr2	18	17	29.3519	14.9751	1.96005	81.0533	104.757
Hs.334066	chr5	18	17	45.5044	23.2203	1.95969	114.213	79.5143
Hs.436029	chr6	18	17	76.4389	39.0064	1.95965	69.0102	87.746
CRIPAK	chr4	36	34	85.1728	43.4716	1.95928	146.749	157.822
CTBP1-AS2	chr4	52	52	334.07	170.59	1.95831	219.393	269.6
Hs.160681	chr9	18	17	32.1229	16.4074	1.95783	71.2773	74.0131
Hs.662764	chr1	18	17	48.8253	24.9408	1.95764	74.2353	73.4926
Hs.673002	chr3	18	17	69.7537	35.6327	1.95758	80.5053	129.588
Hs.658354	chr13	18	17	38.0309	19.4277	1.95756	78.2434	94.9185
Hs.664213	chr19	18	17	60.9647	31.151	1.95707	79.2984	53.0062
Hs.553083	chr4	18	17	31.8211	16.2694	1.95589	98.2834	106.612
COLCA2	chr11	18	17	57.9008	29.6142	1.95517	58.2565	71.4309
LINC00837	chr10	28	26	31.0896	15.9021	1.95507	48.3783	79.5927
Hs.657797	chr14	28	26	63.028	32.2432	1.95477	101.197	74.2116
Hs.598988	chr21	18	17	86.6617	44.3439	1.95431	169.41	74.5994
Hs.678575	chr11	18	17	62.3015	31.8793	1.95429	87.2852	98.7479
Hs.661959	chr10	18	17	29.5318	15.1169	1.95356	68.6001	73.587
TSSK4	chr14	18	17	61.2657	31.3713	1.95292	148.226	90.9496
FLJ41757	chr2	18	17	45.33	23.2126	1.95282	93.0582	111.536
PDCL2	chr4	18	17	35.8603	18.3649	1.95266	93.9992	84.7477
Hs.663018	chr8	18	17	215.387	110.309	1.95257	92.087	93.1709
LINC00636	chr3	18	17	44.2443	22.6711	1.95158	157.925	86.1699
Hs.606288	chr14	18	17	90.7013	46.4781	1.95149	86.6368	65.1749
Hs.661193	chr2	18	17	46.7851	23.9747	1.95143	90.3225	64.7892
ZNF665	chr19	36	35	115.132	59.0248	1.95057	180.224	73.1789
Hs.666931	chr1	18	17	73.7497	37.8216	1.94994	130.345	85.1446
Hs.279472	chr12	18	17	41.7252	21.4019	1.9496	81.3723	75.2065
SHISA3	chr4	18	17	39.7869	20.4105	1.94934	93.1602	97.5479
Hs.663131	chr19	18	17	37.2421	19.1129	1.94853	129.025	87.5357
UBXN2A	chr2	18	17	1339.57	687.73	1.94781	116.561	185.488
Hs.660734	chr3	34	35	47.4816	24.3829	1.94733	113.347	122.328
MEDAG	chr13	54	51	80.373	41.2763	1.9472	184.826	179.914
Hs.661554	chr4	18	17	60.567	31.1052	1.94717	96.281	72.2486
LOC401442	chr8	18	17	38.3951	19.7203	1.94698	63.06	70.8983
Hs.659823	chr15	18	17	42.31	21.7402	1.94616	61.338	76.1076
CCDC88B	chr11	18	17	60.0126	30.8394	1.94597	117.266	55.1277
Hs.677063	chr10	18	17	51.8772	26.673	1.94493	143.614	92.8973
Hs.676049	chr5	18	17	30.2248	15.5467	1.94412	81.2398	82.1258
RGMB-AS1	chr5	18	17	33.7969	17.3899	1.94347	148.039	79.117
Hs.461807	chr17	18	17	30.9215	15.9107	1.94344	68.1323	88.4394
Hs.662545	chr14	18	17	37.2277	19.1563	1.94336	61.5343	82.5051
Hs.648268	chr22	18	17	39.647	20.4018	1.94331	50.449	95.1067
Hs.671884	chr15	18	17	32.675	16.818	1.94286	82.402	85.7025
FAM131C	chr1	18	17	38.1338	19.6332	1.94231	173.829	104.74
LINC00477	chr12	18	17	52.6269	27.1087	1.94133	92.6504	69.8313
Hs.662056	chr20	18	17	65.1868	33.5904	1.94064	53.9961	76.2558
CASP6	chr4	96	97	62.9062	32.4161	1.94059	158.064	69.9927
Hs.613865	chr18	18	17	72.3629	37.291	1.94049	93.4103	119.996
Hs.665862	chr4	18	17	56.7048	29.2218	1.94049	66.3756	102.649
LINC00441	chr13	28	25	41.6775	21.4889	1.93949	113.673	64.8604
Hs.217079	chr10	52	52	71.8427	37.0457	1.9393	132.196	113.296
Hs.58611	chr17	18	17	35.4116	18.2753	1.93767	59.3491	79.6055
TUBB4A	chr19	28	26	677.626	349.712	1.93767	229.777	158.212
KIFC2	chr8	28	25	87.9523	45.3994	1.9373	145.158	92.5858
Hs.130183	chr12	8	9	31.3419	16.1825	1.93678	22.7055	88.968
ATAD3C	chr1	18	17	45.5542	23.5281	1.93616	132.137	89.5859
MAFG-AS1	chr17	18	17	60.4517	31.224	1.93606	50.1553	69.5981
LYSMD1	chr1	18	17	125.646	64.8995	1.93601	218.087	64.0547
Hs.668777	chr2	18	17	47.8159	24.7024	1.93568	48.7539	115.129
GPR160	chr3	18	17	33.3925	17.2549	1.93525	64.435	88.4426
ANKRD36B	chr2	28	26	446.917	230.946	1.93515	159.978	195.327
LOC646014	chr17	18	17	146.174	75.5395	1.93506	87.127	90.645
Hs.733594	chr11	18	17	75.0718	38.7986	1.93491	145.007	46.5947
CXCL17	chr19	18	17	45.6319	23.5879	1.93455	126.859	63.5784
Hs.594814	chr3	18	17	65.9465	34.0915	1.9344	204.379	98.0587
CXCL1	chr4	28	26	71.6495	37.0528	1.93371	275.105	85.1362
Hs.661841	chr6	18	17	62.1987	32.1707	1.9334	112.766	69.8108
OK/SW-CL.36	chr4	18	17	56.6187	29.2906	1.933	96.8356	74.1331
Hs.733100	chr2	18	17	31.707	16.4083	1.93238	72.029	146.507
LOC100506083	chr16	18	17	21.6772	11.2192	1.93214	86.287	105.264
LOC100506470	chr20	18	17	55.2664	28.611	1.93165	48.6605	64.7857
WFDC12	chr20	26	26	59.0146	30.5521	1.9316	143.685	92.6322
EID2B	chr19	18	17	102.663	53.1761	1.93063	216.593	68.5671
LOC100129461	chr6	18	17	46.0739	23.8673	1.93042	51.1579	87.665
Hs.656747	chr15	18	17	75.4122	39.0794	1.92972	72.3945	68.4736
Hs.673891	chr11	18	17	48.1672	24.9654	1.92936	114.536	85.1211
ZBED3-AS1	chr5	64	59	42.9846	22.2841	1.92894	172.234	80.183
DKFZp434L192	chr7	26	26	26.5328	13.7604	1.9282	112.489	97.2636
FAM181A-AS1	chr14	34	35	29.0095	15.0552	1.92688	82.4832	114.473
Hs.669926	chr7	18	17	30.7919	15.9818	1.92669	105.308	111.649
LGALS12	chr11	18	17	24.6837	12.8115	1.92668	73.6891	95.7678
Hs.520477	chr6	18	17	80.8752	41.9774	1.92664	183.797	45.3368
MDS2	chr1	28	25	44.2163	22.9528	1.9264	119.362	96.3901
Hs.444813	chr22	18	17	31.178	16.1854	1.9263	73.8149	88.697
Hs.670239	chr19	20	17	54.9259	28.5181	1.92601	124.564	41.3373
CST9L	chr20	18	17	26.9991	14.0217	1.92552	101.506	90.6973
SLC26A7	chr8	46	42	40.3079	20.9367	1.92522	155.457	106.422
MBD3L1	chr19	28	25	34.1666	17.7674	1.92299	94.1418	95.3594
Hs.123349	chr6	8	9	23.936	12.4529	1.92213	79.3308	83.3116
CD274	chr9	36	34	57.26	29.7991	1.92154	78.7532	93.4195
Hs.570820	chr4	18	17	61.0383	31.7701	1.92125	117.779	109.549
Hs.737822	chr2	36	34	46.0774	23.9831	1.92124	143.775	73.3848
KCTD19	chr16	26	26	31.0828	16.1828	1.92073	82.5466	88.4529
C18orf61	chr18	18	17	85.1151	44.3317	1.91996	94.1452	89.9641
Hs.656383	chr6	72	70	115.328	60.0886	1.9193	152.533	132.118
Hs.658202	chr3	18	17	46.6843	24.3388	1.9181	70.0319	81.093
Hs.605563	chr1	18	17	36.5417	19.0532	1.91788	56.1285	113.123
MTUS2-AS1	chr13	18	17	30.6368	15.9758	1.9177	78.9542	81.0869
LOC100288123	chr19	18	17	45.3514	23.6587	1.9169	93.2753	122.159
Hs.736236	chr12	18	17	38.9244	20.31	1.91651	62.9868	72.6834
MAGEA1	chrX	28	26	44.1547	23.0431	1.91618	86.1197	58.553
Hs.659966	chr9	18	17	17.7887	9.28369	1.91613	84.5054	144.145
BTBD17	chr17	18	17	38.1147	19.9164	1.91373	90.7128	85.4375
MORN3	chr12	18	17	68.8428	35.9774	1.9135	93.8352	54.3705
SRD5A3-AS1	chr4	18	17	23.2068	12.1292	1.9133	115.217	87.0906
Hs.661738	chr2	18	17	60.1255	31.4435	1.91217	83.8786	101.435
Hs.575377	chr6	26	26	83.5849	43.7241	1.91164	138.236	74.9178
Hs.666454	chr5	18	17	30.2546	15.8271	1.91157	78.6377	95.4625
Hs.660508	chr4	18	17	187.859	98.2755	1.91155	163.281	198.28
Hs.732571	chr20	18	17	53.6838	28.0866	1.91137	69.208	82.1047
ARL9	chr4	18	17	39.3045	20.5654	1.91119	79.6397	68.7466
Hs.734108	chr9	18	17	35.8943	18.7852	1.91078	106.901	72
AMOTL1	chr11	72	68	54.9982	28.7879	1.91046	128.057	113.579
Hs.737536	chr7	36	34	48.3299	25.3153	1.90912	153.595	112.347
Hs.669066	chr11	18	17	30.793	16.1295	1.90911	97.6004	87.1989
Hs.27278	chr10	18	17	77.0866	40.38	1.90903	80.1089	73.2074
LOC100129917	chr4	34	35	34.1456	17.8965	1.90795	207.07	87.5533
DEFB118	chr20	18	17	51.9645	27.2404	1.90762	101.947	84.4419
Hs.736256	chr2	18	17	37.0321	19.418	1.9071	79.9581	89.3727
Hs.434799	chr4	18	17	37.2033	19.5172	1.90618	56.6485	84.9078
Hs.292580	chr14	18	17	46.0335	24.1516	1.90603	68.2142	74.4852
LOC283731	chr15	34	35	25.6641	13.4652	1.90595	104.613	117.616
LOC100128653	chr7	18	17	50.679	26.5938	1.90567	98.2409	90.6292
RPA4	chrX	28	26	49.2817	25.8628	1.90551	120.72	60.2994
Hs.559354	chr20	18	17	30.1804	15.8395	1.90539	103.422	80.3714
Hs.577275	chr11	18	17	42.1521	22.1239	1.90527	147.733	91.1177
GRP	chr18	28	26	223.299	117.203	1.90524	146.906	153.854
Hs.736034	chr7	44	44	45.0815	23.6626	1.90518	173.32	62.5211
Hs.595356	chr13	18	17	37.354	19.6107	1.90478	64.9023	102.027
LINC00482	chr17	18	17	23.919	12.5677	1.90322	95.2572	106.324
Hs.99405	chr2	18	17	40.5857	21.3269	1.90303	51.3623	90.26
EPPK1	chr8	108	103	65.7043	34.5351	1.90254	297.874	133.004
TMEM106A	chr17	80	77	50.6166	26.6058	1.90246	162.915	86.8848
SHANK2-AS3	chr11	18	17	41.0763	21.5924	1.90234	90.1725	71.097
Hs.664280	chr11	18	17	47.7232	25.0876	1.90226	96.1764	117.059
Hs.602178	chr2	18	17	45.7796	24.0677	1.90212	135.745	77.0398
ZNF497	chr19	36	34	31.9696	16.8088	1.90195	103.017	79.2899
CASP8	chr2	74	69	69.7418	36.6776	1.90148	163.13	112.361
SLC37A2	chr11	26	26	32.8967	17.3024	1.90128	83.2424	136.491
Hs.736845	chr11	18	17	36.6106	19.2558	1.90128	67.6027	64.0518
Hs.658143	chr1	44	43	33.2393	17.4878	1.90071	79.6042	90.6711
ADIPOQ	chr3	28	26	47.9136	25.213	1.90035	200.09	60.8856
SORCS1	chr10	36	34	62.5488	32.9159	1.90026	153.722	72.5007
OR7D2	chr19	18	17	55.4935	29.21	1.89981	63.7733	60.053
Hs.666301	chr18	18	17	93.9614	49.4741	1.89921	97.218	86.9702
Hs.592518	chr10	18	17	108.574	57.1724	1.89906	70.2725	71.3729
Hs.675465	chr2	18	17	42.5638	22.4184	1.89861	136.681	103.355
NPHS1	chr19	44	44	46.4258	24.4625	1.89784	192.894	68.4436
Hs.434652	chr19	18	17	38.9498	20.5292	1.89729	100.499	124.845
Hs.634874	chr3	18	17	39.9823	21.078	1.89687	80.0419	77.7031
Hs.677089	chr3	18	17	20.5645	10.8416	1.89682	82.9993	111.758
Hs.97313	chr8	18	17	29.7047	15.6614	1.89667	91.9782	125.012
Hs.723551	chr21	18	17	40.603	21.408	1.89663	91.1051	101.171
Hs.661342	chr7	18	17	31.972	16.8612	1.89619	58.5276	86.7055
LRRC38	chr1	18	17	45.4731	23.9814	1.89618	47.7077	61.6932
Hs.655687	chr5	28	26	125.181	66.0584	1.895	82.1837	94.5894
Hs.655315	chr12	34	35	48.9852	25.8532	1.89474	99.9163	80.3902
Hs.435027	chr7	18	17	30.855	16.2846	1.89474	61.1985	113.81
CSTA	chr3	28	26	52.3865	27.6507	1.89458	147.632	51.5176
OR14J1	chr6	18	17	31.1611	16.4486	1.89445	56.7083	89.072
Hs.660611	chr2	18	17	44.6579	23.5745	1.89433	149.417	97.1005
LRP4	chr11	28	26	151.162	79.8207	1.89377	150.117	111.942
MUC17	chr7	36	34	50.8423	26.852	1.89343	82.6027	66.3479
CCDC68	chr18	28	26	41.616	21.9807	1.89329	94.4426	63.8842
SSX2	chrX	100	96	78.658	41.5603	1.89262	264.768	93.4169
Hs.406810	chr17	44	43	77.7912	41.1057	1.89247	179.201	130.916
Hs.679390	chr2	34	35	23.5745	12.4591	1.89215	163.639	92.3755
CCDC158	chr4	36	34	40.8835	21.6105	1.89184	110.654	102.99
HES5	chr1	18	17	29.4596	15.5753	1.89143	103.756	115.53
PCP4	chr21	28	26	518.788	274.38	1.89077	258.527	126.691
Hs.656932	chr10	18	17	20.6375	10.9173	1.89034	79.7623	109.796
Hs.658791	chr1	18	17	130.048	68.8036	1.89013	150.737	160.957
RFX6	chr6	18	17	39.3217	20.8091	1.88964	138.497	91.5095
Hs.677414	chr6	36	34	42.4564	22.4953	1.88735	134.281	68.9485
Hs.357234	chr15	18	17	46.08	24.4182	1.88711	66.958	67.5474
Hs.743844	chr10	18	17	98.426	52.1627	1.8869	146.296	124.83
Hs.714521	chr10	18	17	45.3629	24.0451	1.88658	111.564	63.4671
PM20D1	chr1	18	17	63.0693	33.4362	1.88626	146.343	77.6841
Hs.655019	chr3	26	26	36.8515	19.5379	1.88615	75.5126	133.905
Hs.657431	chr5	18	17	30.6043	16.2295	1.88572	75.8823	132.245
Hs.664262	chr20	18	17	126.674	67.1795	1.8856	119.002	78.1243
Hs.662829	chr19	18	17	65.5919	34.7874	1.88551	130.905	105.814
CCDC117	chr22	36	34	162.016	85.9459	1.8851	166.638	147.503
CALHM3	chr10	18	17	32.5706	17.2798	1.8849	60.4338	78.5901
Hs.678608	chr21	18	17	1258.81	667.861	1.88484	129.91	195.399
EPHA6	chr3	36	34	43.8401	23.2629	1.88455	155.744	70.0549
IL22RA2	chr6	18	17	54.9082	29.141	1.88422	111.7	50.4905
PRICKLE2-AS3	chr3	18	17	45.5697	24.1872	1.88405	58.4511	72.553
Hs.673959	chr14	36	34	50.9561	27.0498	1.88379	68.5944	81.2149
CCDC169	chr13	90	85	35.3698	18.7773	1.88365	134.591	82.104
Hs.561434	chr5	18	17	138.34	73.4452	1.88358	105.116	172.874
KIAA0101	chr15	48	43	115.15	61.1371	1.88348	164.055	84.3716
Hs.150147	chr15	18	17	44.3082	23.526	1.88337	127.174	70.0637
Hs.213735	chr20	18	17	31.9936	16.992	1.88286	58.1718	82.5243
Hs.662697	chr13	18	17	91.4571	48.5872	1.88233	75.953	60.0755
Hs.706272	chr15	36	34	88.4934	47.0168	1.88217	134.053	150.964
Hs.655063	chr8	18	17	39.6318	21.0638	1.88151	143.059	131.66
Hs.653381	chr10	18	17	92.3343	49.0834	1.88117	111.142	109.321
ZNF790-AS1	chr19	36	34	52.0282	27.6582	1.88112	133.78	71.0331
Hs.6985	chr2	18	17	27.6672	14.7082	1.88107	77.6478	89.9501
NT5C3B	chr17	18	17	83.7991	44.5538	1.88085	91.7661	67.4168
PRSS55	chr8	18	17	30.3165	16.12	1.88067	85.5632	105.039
Hs.650220	chr14	18	17	31.3979	16.6956	1.88061	84.6146	75.6529
Hs.686993	chr19	18	17	38.965	20.7205	1.8805	150.233	83.5946
Hs.737141	chr8	18	17	89.3899	47.5369	1.88043	149.578	139.878
PVRL4	chr1	18	17	52.551	27.9618	1.87938	99.46	86.6319
LOC284837	chr21	18	17	47.5917	25.3273	1.87907	81.1702	68.1541
CLU	chr8	102	95	402.229	214.063	1.87902	223.702	174.073
TAS2R38	chr7	18	17	32.0032	17.0359	1.87858	83.7197	101.227
Hs.534682	chr3	18	17	33.7246	17.9589	1.87788	87.2576	78.3479
Hs.702522	chr14	18	17	36.3111	19.3416	1.87736	92.3475	92.2191
Hs.447814	chrX	64	61	37.9893	20.2372	1.8772	186.824	74.4806
Hs.710970	chr3	18	17	56.5006	30.1031	1.87691	145.189	88.8382
Hs.98470	chr5	18	17	15.716	8.37767	1.87595	106.658	121.455
BCDIN3D-AS1	chr12	28	25	52.5898	28.037	1.87573	95.6968	75.6308
LRGUK	chr7	18	17	60.341	32.1734	1.87549	84.1679	61.2203
Hs.684728	chr13	34	35	22.9215	12.2307	1.87409	88.0248	99.9816
LINC00540	chr13	18	17	61.3997	32.768	1.87377	85.4597	56.9467
Hs.733648	chr13	18	17	94.5063	50.4391	1.87367	133.983	150.829
PNO1	chr2	82	78	496.41	265.02	1.87311	251.858	294.611
Hs.149979	chr14	18	17	62.7179	33.496	1.8724	109.67	123.829
Hs.385516	chr10	18	17	44.6107	23.8274	1.87224	92.5916	74.5992
Hs.662845	chr4	18	17	37.693	20.1353	1.87199	77.2061	94.7596
OR1C1	chr1	36	34	40.5507	21.6627	1.87192	90.9694	102.526
Hs.152812	chr2	18	17	29.4167	15.7172	1.87163	106.051	99.5221
Hs.735516	chr3	26	26	46.314	24.7521	1.87111	217.975	84.6846
ZFYVE19	chr15	26	26	45.9693	24.5692	1.87101	114.819	114.666
Hs.602583	chr4	18	17	59.1429	31.6169	1.87061	111.62	95.9341
Hs.667258	chr17	18	17	37.0331	19.8004	1.87032	63.799	92.7732
Hs.569174	chr12	18	17	70.8426	37.8807	1.87015	195.725	74.6502
Hs.661105	chr17	26	26	32.0296	17.1327	1.8695	82.3726	112.746
Hs.667773	chrX	28	25	39.7332	21.2589	1.86901	106.773	90.0058
Hs.657817	chr2	46	42	226.638	121.279	1.86873	171.737	183.897
LOC100506827	chr4	26	26	52.787	28.2569	1.86811	204.86	71.6336
Hs.599210	chr12	18	17	46.4496	24.8682	1.86783	92.5907	74.1723
Hs.25447	chr13	18	17	31.9278	17.0938	1.8678	134.252	111.826
Hs.657613	chr1	18	17	33.2425	17.8015	1.8674	67.0346	79.6309
Hs.669903	chr18	18	17	39.7893	21.3106	1.86711	111.019	70.2956
Hs.703099	chr16	18	17	94.0469	50.3774	1.86685	168.578	103.264
PSG7	chr19	20	17	89.3827	47.8795	1.86682	59.8155	68.5232
MALRD1	chr10	18	17	31.1054	16.6631	1.86673	89.2234	93.7362
DYDC2	chr10	18	17	45.975	24.6349	1.86626	66.735	83.2022
C3orf30	chr3	18	17	35.2829	18.9081	1.86602	61.9026	87.5731
Hs.666086	chr12	18	17	51.7959	27.7628	1.86566	54.9731	94.2774
Hs.135052	chr19	18	17	35.2639	18.9032	1.86549	109.317	80.1206
Hs.659882	chr15	18	17	67.0656	35.9509	1.86547	64.6241	70.8718
Hs.407358	chr14	36	34	47.0568	25.2323	1.86494	80.7119	84.1566
TMX1	chr14	56	52	108.262	58.054	1.86485	175.435	87.376
LOC100505811	chr5	18	17	21.9972	11.7997	1.86421	119.528	122.315
Hs.665727	chr8	18	17	49.379	26.5026	1.86317	55.9379	79.2884
Hs.649732	chr7	18	17	43.1461	23.1582	1.8631	114.097	92.3975
Hs.586700	chr11	36	34	56.0465	30.0888	1.8627	247.842	67.913
Hs.638954	chr6	18	17	47.4712	25.4941	1.86204	121.593	92.4269
BAG2	chr6	46	43	52.1051	27.9866	1.86178	148.11	75.6646
Hs.669080	chr7	18	17	40.0434	21.5152	1.86117	85.6464	85.4242
LINC01193	chr15	18	17	26.5355	14.2642	1.86029	68.9559	119.063
Hs.744325	chr17	36	34	68.6292	36.8947	1.86014	159.306	68.3259
Hs.658802	chr5	36	34	48.1892	25.9093	1.85992	102.129	64.0324
HOXC4	chr12	84	78	127.646	68.6542	1.85926	247.515	122.034
Hs.520658	chr1	18	17	30.1109	16.1963	1.85912	95.1723	104.622
Hs.202349	chr16	18	17	35.9614	19.3442	1.85902	60.4358	62.9913
CABP7	chr22	36	34	56.8362	30.5768	1.8588	143.838	148.921
Hs.470445	chr2	26	26	35.809	19.2654	1.85872	91.2738	94.419
Hs.670769	chr6	18	17	69.1183	37.1886	1.85859	151.372	103.536
COL15A1	chr9	28	26	52.4457	28.2289	1.85787	117.024	51.3155
Hs.667083	chr3	18	17	24.5478	13.2144	1.85765	54.34	91.4359
STOX1	chr10	36	34	54.2479	29.2158	1.8568	89.1681	82.7178
ZIC2	chr13	18	17	198.185	106.74	1.85671	197.73	159.291
Hs.374124	chr1	18	17	44.0404	23.7262	1.85619	118.607	91.0176
TRIM72	chr16	18	17	59.6399	32.1311	1.85614	168.247	57.3298
Hs.42419	chr3	18	17	46.6427	25.1358	1.85563	142.463	76.1717
LOC100505835	chr19	36	34	49.7041	26.7867	1.85555	116.445	80.6192
Hs.385785	chr11	18	17	30.6708	16.5292	1.85555	75.7893	75.1677
Hs.619896	chr4	18	17	29.2984	15.7925	1.85521	81.0053	94.9748
Hs.670272	chr15	18	17	35.3393	19.0497	1.85511	210.798	107.918
Hs.652454	chr1	18	17	23.2131	12.5133	1.85507	91.6396	103.45
CHI3L1	chr1	84	78	150.856	81.3221	1.85505	214.525	162.889
RBBP8NL	chr20	18	17	29.9059	16.1248	1.85465	96.1001	91.9019
FAM76A	chr1	64	60	105.948	57.136	1.85432	234.027	187.326
Hs.380686	chr7	18	17	30.5288	16.4648	1.85418	71.1869	100.598
Hs.673171	chr14	18	17	71.6255	38.665	1.85246	111.25	105.236
Hs.664744	chr2	18	17	46.42	25.0617	1.85223	117.303	78.2501
Hs.677250	chr2	36	34	138.203	74.6365	1.85168	211.482	207.926
Hs.596385	chr2	18	17	302.558	163.44	1.85119	117.177	205.582
Hs.667100	chr3	18	17	29.2203	15.7852	1.85112	60.3073	82.6176
Hs.435289	chr22	18	17	74.2379	40.1091	1.8509	81.1169	156.573
Hs.672896	chr6	18	17	37.3009	20.1589	1.85034	125.915	83.0031
Hs.436047	chr11	18	17	41.4993	22.4505	1.84848	55.5597	75.0416
PRAP1	chr10	18	17	34.3831	18.6095	1.84761	71.1072	81.8243
Hs.660822	chr19	18	17	79.8446	43.2162	1.84756	95.7107	116.978
Hs.633712	chr22	18	17	28.306	15.3251	1.84703	89.9886	74.427
Hs.729639	chr1	18	17	47.6586	25.8061	1.8468	45.5195	63.6238
Hs.569416	chr15	18	17	31.1513	16.869	1.84666	76.1756	98.9556
Hs.614586	chr6	18	17	24.3273	13.1749	1.84649	87.8157	95.1711
Hs.710901	chr22	18	17	76.5228	41.4503	1.84613	143.295	103.757
Hs.726818	chr5	18	17	43.0872	23.3435	1.84579	85.9034	92.5846
Hs.636112	chr17	26	26	62.9087	34.0837	1.84571	134.944	86.478
DCDC5	chr11	18	17	35.2156	19.0858	1.84512	64.2721	99.2177
Hs.569669	chr16	26	26	36.9869	20.0729	1.84263	79.9364	129.254
Hs.660379	chr2	18	17	98.8105	53.6445	1.84195	82.9423	50.3749
OTOP2	chr17	44	43	30.9349	16.7967	1.84172	144.251	87.9242
LINC00668	chr18	18	17	37.6626	20.456	1.84115	77.9245	80.7286
KIAA1614	chr1	44	44	57.3142	31.1321	1.841	124.771	130.461
Hs.659850	chr5	18	17	65.86	35.7766	1.84087	91.6337	64.4902
GPX2	chr14	46	43	71.3862	38.7857	1.84053	157.213	64.1169
Hs.677122	chr15	36	35	85.4167	46.4385	1.83935	127.367	86.9455
Hs.535810	chr5	18	17	91.3685	49.6768	1.83926	124.45	182.504
Hs.636076	chr8	18	17	39.2567	21.3449	1.83916	150.455	84.788
Hs.14032	chr14	18	17	35.0444	19.0549	1.83913	63.5285	86.0333
MALAT1	chr11	228	224	1819.32	989.512	1.83861	154.806	177.281
Hs.656379	chr3	18	17	207.942	113.112	1.83838	161.275	177.337
LYG1	chr2	18	17	34.2638	18.6382	1.83837	75.6096	79.7876
ENAM	chr4	18	17	41.2305	22.4304	1.83815	139.695	91.4944
Hs.445149	chr9	18	17	81.1004	44.1319	1.83768	115.336	146.44
LOC100505853	chr18	18	17	30.4914	16.5938	1.83751	84.4739	95.3078
ASB17	chr1	18	17	38.7386	21.0844	1.83731	76.0126	73.556
Hs.551197	chr11	18	17	25.5602	13.9126	1.83719	84.5871	111.175
Hs.598983	chr6	18	17	149.221	81.2315	1.83699	147.691	144.366
LOC100287704	chr7	36	34	37.5018	20.4159	1.83689	77.7025	79.3864
Hs.733839	chr4	18	17	50.5393	27.5183	1.83657	151.684	168.286
Hs.85445	chr7	18	17	25.5917	13.9351	1.83649	71.2816	94.5091
LOC100506302	chr7	18	17	31.3426	17.069	1.83623	78.0958	80.8066
DEFB103A	chr8	18	17	45.5344	24.8094	1.83537	62.8365	64.1598
Hs.221951	chr19	18	17	56.9832	31.0488	1.83528	44.4557	70.5073
EGF	chr4	36	35	55.0771	30.0108	1.83525	127.944	59.7014
Hs.660667	chr3	18	17	112.858	61.4959	1.83521	163.878	80.3969
Hs.597879	chr1	18	17	63.7795	34.7559	1.83507	85.3081	86.0506
KRTAP4-8	chr17	18	17	66.721	36.3644	1.83479	88.6728	67.2283
Hs.657400	chr7	18	17	138.521	75.5431	1.83368	108.067	111.171
IGLV4-3	chr22	18	17	35.8794	19.5671	1.83366	81.5235	73.6558
Hs.549659	chr5	18	17	67.0801	36.588	1.83339	213.407	111.881
Hs.680514	chr16	18	17	32.0313	17.4728	1.83321	101.632	86.6698
ZNF831	chr20	28	25	34.6752	18.9227	1.83247	69.0564	89.4169
FBLIM1	chr1	72	68	56.4906	30.8276	1.83247	179.478	105.322
Hs.464896	chr18	18	17	28.7156	15.6719	1.8323	71.9309	100.749
NEURL3	chr2	18	17	34.7702	18.9815	1.83179	59.6694	85.6995
Hs.602360	chr2	18	17	35.3989	19.3268	1.8316	57.2589	77.5001
TEX19	chr17	18	17	55.0537	30.0736	1.83063	63.6976	71.5091
Hs.124672	chr22	18	17	48.0493	26.2496	1.83048	62.3555	77.038
NKX1-1	chr4	18	17	21.0173	11.4845	1.83005	88.189	136.061
Hs.610726	chr12	18	17	55.6655	30.4307	1.82925	49.0805	79.4285
Hs.671895	chr18	36	34	45.0291	24.6274	1.82842	125.341	82.4828
Hs.697530	chr22	18	17	22.6288	12.3765	1.82836	82.7198	105.991
SGCZ	chr8	18	17	30.7348	16.8102	1.82835	150.499	92.7856
Hs.143713	chr19	8	9	13.3438	7.29922	1.82811	77.1055	123.54
KCNRG	chr13	36	34	46.9555	25.6864	1.82803	90.4093	78.0106
C3orf22	chr3	18	17	39.5729	21.6498	1.82786	47.1623	54.7893
LINC00317	chr21	18	17	28.6493	15.6752	1.82768	133.396	97.3883
Hs.145933	chr6	18	17	31.2352	17.0905	1.82763	44.711	91.6305
Hs.10739	chr22	18	17	46.9839	25.7101	1.82745	100.146	68.5115
Hs.585161	chr1	18	17	32.5052	17.8039	1.82573	106.226	92.7274
Hs.33756	chr3	18	17	34.579	18.9444	1.82529	65.2786	62.9127
FBXO36	chr2	36	34	33.1265	18.1491	1.82524	81.2383	88.5538
Hs.659055	chr11	36	34	77.1519	42.2805	1.82477	176.935	92.7043
Hs.557142	chr13	18	17	27.8578	15.2667	1.82474	79.7863	83.6822
Hs.180758	chr10	18	17	25.892	14.1912	1.82451	102.529	80.5459
Hs.194152	chr4	18	17	43.473	23.8289	1.82438	68.3208	80.1091
Hs.191230	chr15	8	9	17.4906	9.58723	1.82436	130.105	141.155
Hs.196945	chr6	8	9	40.7362	22.3293	1.82434	74.9195	72.0114
Hs.304781	chr2	28	25	29.9508	16.4183	1.82424	61.5606	108.05
LOC401220	chr5	18	17	78.2862	42.9199	1.82401	153.286	85.3557
ZNF19	chr16	18	17	28.0231	15.3709	1.82313	124.079	94.4508
LOC731779	chr8	18	17	42.4139	23.2673	1.8229	72.0213	104.33
Hs.638457	chr18	18	17	36.1566	19.8424	1.82218	62.7026	104.429
Hs.663663	chr1	18	17	19.2249	10.5531	1.82173	82.6646	125.145
FLYWCH2	chr16	26	26	71.247	39.1306	1.82075	124.812	64.5587
HSPH1	chr13	64	61	418.232	229.752	1.82036	157.708	136.511
SPATA18	chr4	52	52	33.8108	18.5755	1.82018	73.8357	90.4923
Hs.684149	chr21	18	17	18.3304	10.0724	1.81987	87.9506	122.887
Hs.658225	chr12	18	17	56.7229	31.1693	1.81983	138.36	66.7996
Hs.557916	chr11	18	17	39.0776	21.474	1.81977	115.798	87.5106
INIP	chr9	36	34	130.747	71.8485	1.81976	73.4213	80.5851
VWCE	chr11	18	17	44.4759	24.4415	1.81969	76.69	81.7126
Hs.215801	chr12	18	17	23.82	13.0924	1.81938	70.1174	73.5137
Hs.667527	chr9	18	17	38.8553	21.36	1.81906	88.9963	80.7423
LINC00032	chr9	64	59	44.9891	24.7347	1.81887	132.673	92.3109
Hs.672035	chr6	18	17	45.8796	25.2261	1.81874	168.113	62.6808
Hs.745357	chr8	18	17	24.2378	13.3272	1.81867	96.1952	107.887
IBA57-AS1	chr1	18	17	44.5821	24.5177	1.81836	63.149	91.8276
SIGLEC10	chr19	36	34	117.573	64.6646	1.8182	132.99	97.3921
Hs.663523	chr5	36	34	61.2718	33.7004	1.81813	216.47	141.921
AA06	chr17	18	17	35.7231	19.653	1.8177	93.0232	83.828
Hs.735990	chr3	18	17	99.1607	54.5543	1.81765	131.048	136.133
Hs.173727	chr11	18	17	48.4302	26.6508	1.81721	74.1263	54.4472
RUSC1-AS1	chr1	36	34	54.8978	30.213	1.81702	92.8905	65.7718
IZUMO1	chr19	18	17	50.2916	27.6818	1.81677	77.2108	80.6498
Hs.691665	chr7	18	17	41.6602	22.9329	1.81661	89.8037	73.7128
Hs.662088	chr3	18	17	46.3594	25.5203	1.81657	95.9718	68.7013
NBPF12	chr1	10	8	158.455	87.2368	1.81638	68.2923	82.4587
Hs.740613	chr3	18	17	27.8555	15.3393	1.81595	60.4351	108.065
LOC100130111	chr15	28	25	34.6843	19.1078	1.81519	119.719	95.9516
Hs.662760	chr1	18	17	64.2353	35.3881	1.81517	156.227	63.4063
Hs.733775	chr5	18	17	49.4173	27.2291	1.81487	102.161	69.8262
Hs.670544	chrY	18	17	33.6255	18.5285	1.8148	105.025	96.2526
ERVFC1-1	chr7	8	9	39.5644	21.8021	1.81471	53.5764	78.9987
C20orf62	chr20	46	42	39.0426	21.518	1.81441	117.382	87.655
Hs.678812	chr5	18	17	20.0861	11.0731	1.81396	74.5289	95.9227
WBSCR28	chr7	18	17	25.5785	14.101	1.81395	58.4875	109.921
CCDC78	chr16	18	17	61.4335	33.8682	1.8139	57.3631	59.7457
LOC100507468	chr7	18	17	20.7286	11.4325	1.81312	76.1227	81.5588
Hs.595873	chr17	18	17	56.6017	31.2212	1.81293	107.985	97.4855
Hs.677505	chr10	18	17	66.6567	36.7789	1.81236	72.5961	126.417
LINC00184	chr1	28	25	32.6642	18.0271	1.81195	88.7193	98.7884
Hs.592734	chr18	18	17	45.2226	24.9586	1.81191	111.635	80.4177
LOC100507616	chr12	28	25	39.1547	21.6129	1.81164	152.495	66.9394
GALM	chr2	28	25	72.825	40.2067	1.81126	85.5954	90.2648
Hs.677120	chr2	34	35	34.939	19.2926	1.81101	106.929	101.017
EMC10	chr19	18	17	61.434	33.9261	1.81082	98.6622	75.8012
ZNF28	chr19	18	17	42.6997	23.5832	1.8106	143.684	87.6322
Hs.572317	chr15	18	17	20.8651	11.5242	1.81054	105.845	142.598
Hs.734070	chr18	36	34	83.6894	46.2473	1.80961	158.278	138.286
Hs.434240	chr7	18	17	33.0141	18.2519	1.80881	69.7178	105.81
Hs.735594	chr2	18	17	65.9017	36.4351	1.80874	70.3596	75.7268
Hs.661853	chrX	18	17	27.8567	15.4072	1.80804	84.9237	100.891
TNFSF13B	chr13	36	34	134.795	74.5624	1.80782	94.1205	87.8357
FGF4	chr11	18	17	31.0485	17.1754	1.80773	124.821	85.1524
SBSN	chr19	18	17	19.0647	10.549	1.80725	82.2204	120.891
NOTCH2NL	chr1	46	43	905.564	501.184	1.80685	143.6	158.806
LOC100131496	chr20	18	17	40.8095	22.5881	1.80668	123.557	73.1641
LINC00491	chr5	38	33	32.6692	18.086	1.80633	95.4033	133.233
Hs.551189	chr10	18	17	46.1752	25.573	1.80562	84.0677	93.7078
DZIP1L	chr3	18	17	38.0855	21.0972	1.80524	77.1118	66.1425
Hs.171463	chr5	18	17	31.3754	17.3858	1.80465	96.4949	95.3732
Hs.665416	chr10	18	17	54.7844	30.3642	1.80424	107.583	77.3656
Hs.673247	chr18	28	25	48.6574	26.9721	1.80399	122.786	74.9759
LRRC18	chr10	18	17	53.7255	29.7873	1.80364	69.7847	69.9768
PTPRO	chr12	66	60	3365.67	1866.27	1.80342	205.523	261.769
Hs.660220	chr11	18	17	38.9986	21.6273	1.80321	70.8768	99.1942
PCOLCE-AS1	chr7	18	17	33.5248	18.5933	1.80306	67.4987	74.6816
Hs.666791	chr14	18	17	99.3617	55.1836	1.80056	82.0957	66.1658
LINC00565	chr13	18	17	38.4564	21.3591	1.80047	49.3054	93.5337
ATP1B4	chrX	46	43	46.821	26.0074	1.8003	179.628	59.375
ZNF528	chr19	28	26	532.587	295.916	1.79979	170.437	221.965
Hs.677113	chr10	36	35	48.017	26.6798	1.79975	101.83	77.0061
MTCP1	chrX	20	17	47.6921	26.5008	1.79965	99.7797	52.7593
Hs.732654	chr17	18	17	32.7583	18.2043	1.79948	61.7894	89.0885
Hs.729487	chr5	18	17	140.669	78.172	1.79948	153.695	155.358
FOXP3	chrX	74	69	53.2662	29.6053	1.79921	75.2787	80.661
C16orf89	chr16	18	17	52.643	29.2597	1.79917	71.3762	69.1529
Hs.130612	chr7	18	17	37.8472	21.0422	1.79863	94.1983	117.101
Hs.55295	chr12	18	17	52.5729	29.2319	1.79848	75.654	103.835
Hs.567518	chr16	18	17	54.4648	30.2935	1.79791	61.7786	59.4842
ACER1	chr19	18	17	25.7096	14.3038	1.7974	129.475	94.7007
MAF	chr16	146	138	97.843	54.4433	1.79715	265.466	171.357
Hs.106296	chr12	8	9	22.1604	12.3317	1.79703	69.4539	93.5086
LOC284454	chr19	36	34	116.021	64.6292	1.79518	120.239	96.7983
Hs.125829	chr19	18	17	61.9327	34.5032	1.79498	68.2857	51.6118
Hs.621874	chr1	18	17	43.4748	24.2246	1.79466	113.141	172.337
Hs.677204	chr6	18	17	48.7556	27.1701	1.79446	71.6897	77.2192
COL4A4	chr2	64	60	42.5274	23.6996	1.79444	91.6809	70.0763
Hs.658173	chr5	18	17	38.7714	21.62	1.79332	53.4568	77.2509
Hs.207604	chr16	18	17	57.3842	31.9999	1.79326	103.906	84.2299
CRYAB	chr11	28	26	703.381	392.261	1.79314	158.764	172.836
Hs.515976	chr2	44	43	32.4578	18.1043	1.79282	74.3266	101.036
Hs.734519	chr5	18	17	83.554	46.6055	1.79279	68.1673	63.6286
SERPINA7	chrX	28	26	48.8973	27.2833	1.79221	109.415	54.6681
Hs.649325	chr2	18	17	59.5041	33.2043	1.79206	173.327	106.129
PHAX	chr5	54	51	253.239	141.386	1.79112	187.551	173.321
TMEM63B	chr6	18	17	65.1233	36.368	1.79068	109.88	89.3901
DSC3	chr18	64	61	35.0211	19.5581	1.79061	81.7989	73.4881
LSM11	chr5	36	34	33.6803	18.8127	1.7903	65.2314	82.9558
SMIM24	chr19	18	17	52.8694	29.5368	1.78995	87.1823	78.1274
INE1	chrX	28	26	83.2799	46.5334	1.78968	64.7864	88.0754
KDELC2	chr11	18	17	76.5393	42.7717	1.78948	77.9333	65.3094
Hs.664926	chr2	18	17	64.4113	35.9981	1.7893	133.115	92.6905
Hs.611630	chr20	18	17	41.7819	23.3576	1.78879	93.7901	66.7269
TPRXL	chr3	18	17	26.7384	14.949	1.78864	56.4556	95.5411
Hs.667061	chr14	18	17	39.6923	22.1973	1.78816	85.5406	82.6284
C1orf186	chr1	18	17	30.5169	17.0667	1.7881	94.7062	115.02
HRSP12	chr8	46	43	76.065	42.5473	1.78778	169.158	59.6623
Hs.659073	chr12	26	26	46.1172	25.8009	1.78742	66.0289	85.9607
Hs.634688	chr9	18	17	53.7802	30.1094	1.78616	122.238	108.106
OR5H1	chr3	36	34	51.7654	28.9848	1.78595	164.507	138.599
Hs.595738	chr9	18	17	28.3029	15.853	1.78534	109.203	73.0211
Hs.722308	chr8	18	17	147.39	82.562	1.7852	155.144	116.232
Hs.129800	chr8	18	17	47.7402	26.7423	1.78519	68.3679	69.9642
Hs.551847	chr1	18	17	43.2053	24.2039	1.78505	54.6344	70.315
PRSS1	chr7	100	96	73.1319	40.9915	1.78407	137.749	120.99
Hs.670023	chr4	44	44	57.8715	32.4413	1.78388	107.137	79.418
Hs.605145	chr18	18	17	29.2932	16.4216	1.78382	58.9174	93.2341
Hs.607412	chr11	18	17	57.2074	32.0766	1.78346	98.6721	83.1432
Hs.623892	chr10	18	17	34.4551	19.332	1.78228	88.2039	130.998
SIRPD	chr20	18	17	45.3153	25.4266	1.7822	98.0528	73.827
F7	chr13	46	43	70.7823	39.7176	1.78214	135.813	76.731
Hs.733852	chr8	18	17	28.3887	15.9335	1.7817	64.8805	121.28
Hs.732502	chr3	18	17	62.9256	35.3261	1.78128	107.091	97.9874
Hs.668074	chr5	18	17	39.2923	22.0595	1.7812	53.2286	81.6017
Hs.105268	chr1	18	17	38.394	21.5585	1.78092	91.226	101.718
Hs.662251	chr4	18	17	37.4463	21.0331	1.78035	99.5122	67.0296
GPR156	chr3	36	34	28.4501	15.9805	1.7803	63.8795	100.817
Hs.720692	chr21	68	70	370.208	207.965	1.78015	230.274	287.689
MAML2	chr11	18	17	35.5913	19.9944	1.78007	74.54	76.4932
PIWIL1	chr12	36	35	57.5146	32.314	1.77986	181.58	131.106
Hs.655542	chr9	18	17	123.593	69.4408	1.77984	126.95	195.665
DNAJC9-AS1	chr10	18	17	38.624	21.702	1.77975	50.4265	163.551
FBXO39	chr17	18	17	25.7415	14.4664	1.7794	87.0088	141.495
Hs.658935	chr10	18	17	250.119	140.632	1.77854	138.044	179.455
RHOXF2B	chrX	18	17	38.2437	21.5079	1.77813	96.2299	76.1017
TCP10	chr6	28	26	48.5311	27.301	1.77763	136.511	79.7924
Hs.444197	chr3	18	17	30.3941	17.1043	1.77698	71.1827	66.2206
ZC2HC1B	chr6	18	17	32.4876	18.2837	1.77686	51.0324	94.2955
RDM1	chr17	18	17	53.535	30.1294	1.77683	122.152	67.9255
LOC645739	chr13	26	26	26.4163	14.8678	1.77674	92.0649	101.74
Hs.616890	chr7	18	17	72.9809	41.0857	1.77631	45.1439	48.9576
Hs.662725	chr22	36	34	41.3821	23.3043	1.77573	127.721	102.375
MRAS	chr3	54	52	147.205	82.9015	1.77566	162.096	122.898
CCDC62	chr12	18	17	27.9613	15.748	1.77554	81.0797	124.745
LOC100506699	chr7	28	26	46.7841	26.3565	1.77505	90.5796	55.0595
LINC00324	chr17	18	17	35.9778	20.2687	1.77504	84.9403	81.3696
C9orf62	chr9	18	17	35.7827	20.1628	1.77469	100.77	69.623
Hs.597262	chr16	18	17	28.6017	16.1195	1.77435	69.9331	112.306
KLK15	chr19	74	68	48.6165	27.4027	1.77415	130.389	77.2229
Hs.657815	chr2	18	17	37.6836	21.245	1.77376	93.2323	134.931
C11orf94	chr11	18	17	49.6839	28.0112	1.77371	89.2167	89.0611
Hs.457403	chr5	18	17	31.8279	17.9475	1.77339	148.772	74.6781
Hs.667313	chr5	34	35	171.065	96.4671	1.7733	155.938	169.287
Hs.671728	chr15	26	26	40.1515	22.6428	1.77326	126.361	75.9688
Hs.672681	chr2	18	17	19.4127	10.9484	1.77311	62.1874	122.296
Hs.12316	chr3	18	17	25.9995	14.6657	1.7728	68.5002	94.1611
Hs.661647	chr5	18	17	43.2823	24.4169	1.77264	87.3399	77.7316
Hs.666142	chr19	18	17	21.7782	12.2862	1.77257	150.608	112.422
LOC286149	chr8	18	17	32.6952	18.4488	1.77221	72.1442	83.391
Hs.91916	chr8	8	9	26.5619	14.9884	1.77216	38.9674	70.46
MGC39584	chr21	36	34	44.1702	24.9272	1.77197	135.737	89.6686
Hs.662765	chr21	18	17	28.6222	16.1533	1.77191	82.0221	90.7483
Hs.167167	chr22	26	26	37.5416	21.19	1.77167	64.2078	81.6455
Hs.129543	chr14	28	25	28.1589	15.8972	1.77131	83.1429	87.3951
LINC00330	chr13	18	17	54.5518	30.8134	1.77039	93.1401	64.7897
FOXD2	chr1	28	26	42.393	23.9466	1.77031	58.7871	70.4638
IFNK	chr9	18	17	34.7726	19.6441	1.77013	79.2081	81.8584
Hs.687496	chr17	18	17	85.3556	48.2266	1.76988	134.614	121.529
LINC00460	chr13	36	34	39.5492	22.3472	1.76977	140.493	92.8635
Hs.669866	chr5	26	26	61.7092	34.8718	1.7696	130.151	95.467
Hs.669878	chr5	18	17	26.5224	14.9887	1.76949	97.7176	77.8302
Hs.578516	chr15	18	17	24.4517	13.8194	1.76937	88.8255	87.9361
LINC00304	chr16	28	25	44.0598	24.9034	1.76922	82.5892	61.1032
Hs.133472	chr10	8	9	30.7243	17.3678	1.76903	49.9125	89.4322
Hs.741808	chr1	18	17	77.0186	43.5443	1.76874	79.4913	68.8992
ALX1	chr12	28	26	45.9559	25.9851	1.76855	61.7874	58.9666
LOC642620	chr7	18	17	27.4606	15.5272	1.76854	76.7357	92.7967
NME9	chr3	36	34	58.3145	32.9761	1.76839	100.373	93.6226
PATL2	chr15	18	17	31.0225	17.5451	1.76816	72.2528	89.5292
Hs.664258	chr12	18	17	28.7267	16.2493	1.76788	101.537	110.729
KIAA0226L	chr13	64	61	81.5311	46.1257	1.76759	134.816	121.988
MCM8	chr20	52	52	35.3269	19.9881	1.7674	70.5139	83.0314
C3orf56	chr3	18	17	36.7441	20.7914	1.76727	87.9245	82.7675
LINC00445	chr13	18	17	37.0737	20.9787	1.76721	81.6099	98.1847
C14orf28	chr14	36	34	60.8498	34.449	1.76637	244.713	74.5241
PRKG1-AS1	chr10	18	17	31.4803	17.8226	1.76631	66.6833	79.722
CDHR3	chr7	36	34	55.8625	31.6326	1.76598	85.4103	69.7298
LOC100130987	chr11	44	43	35.4578	20.0788	1.76593	84.8424	79.6925
Hs.710399	chr17	18	17	45.3614	25.6876	1.76589	166.15	92.1549
Hs.529566	chr7	18	17	48.5533	27.4952	1.76588	72.1782	110.549
Hs.675828	chr2	18	17	39.3035	22.2614	1.76554	65.1815	66.6913
PVT1	chr8	100	95	46.5334	26.3654	1.76494	145.016	71.642
Hs.570630	chr3	18	17	28.0072	15.8708	1.7647	86.5929	135.706
OVOL2	chr20	64	61	64.1495	36.3523	1.76466	153.168	66.0104
Hs.735141	chrX	18	17	33.5118	18.9959	1.76416	50.9597	89.1717
ZBTB8A	chr1	10	8	46.8947	26.5862	1.76387	84.8724	38.1815
DIAPH3	chr13	64	60	45.2475	25.6533	1.76381	135.795	82.2283
Hs.659398	chr15	36	34	36.698	20.811	1.76339	178.953	99.4182
Hs.636231	chr7	28	25	67.514	38.2927	1.7631	122.615	74.9371
MFSD6L	chr17	18	17	36.0872	20.4681	1.76309	71.7977	73.246
Hs.661618	chr22	18	17	31.0013	17.5843	1.763	101.119	76.6581
ODF1	chr8	28	26	60.5217	34.3288	1.763	170.578	57.1608
MYO1E	chr15	28	26	55.4029	31.4272	1.7629	77.9261	54.5044
TAF3	chr10	18	17	96.8786	54.9547	1.76288	79.0492	82.9336
G3BP1	chr5	92	86	317.012	179.84	1.76275	275.552	322.184
Hs.660039	chr1	18	17	36.8759	20.9213	1.7626	109.554	85.693
Hs.662623	chr19	18	17	46.2698	26.2512	1.76258	89.2631	92.8027
Hs.666674	chr8	18	17	28.2027	16.0031	1.76232	88.2143	84.1613
FATE1	chrX	18	17	38.2664	21.714	1.76229	100.725	74.4698
Hs.524596	chr12	18	17	34.8202	19.759	1.76225	71.1001	78.1376
Hs.526761	chr3	18	17	31.312	17.774	1.76168	83.6881	91.7444
Hs.116153	chr18	18	17	69.6552	39.5467	1.76134	99.1088	139.612
GOT1L1	chr8	36	34	40.7442	23.1328	1.76132	102.212	77.5813
Hs.650822	chr18	18	17	36.3247	20.6237	1.76131	194.198	78.2403
Hs.656946	chr2	18	17	52.0633	29.5614	1.76119	47.9853	53.1394
FLJ31713	chr9	18	17	45.2418	25.6886	1.76116	86.5305	70.634
Hs.687670	chr4	28	25	74.8422	42.497	1.76112	135.876	111
Hs.734770	chr2	34	35	48.0218	27.2724	1.76082	172.19	85.9835
Hs.221337	chr1	18	17	26.3378	14.9586	1.76071	59.6776	95.495
PLEKHB1	chr11	64	60	146.951	83.4683	1.76056	163.985	122.861
C14orf182	chr14	52	52	25.3725	14.4157	1.76006	77.7905	85.7313
Hs.436105	chr17	18	17	25.7116	14.6093	1.75995	67.4786	119.704
IDH1-AS1	chr2	18	17	45.2047	25.6871	1.75982	103.652	75.2147
MCF2L-AS1	chr13	8	9	57.7818	32.8376	1.75962	32.191	88.4641
Hs.347302	chr16	18	17	28.9751	16.4697	1.7593	85.4652	88.1103
Hs.663061	chr1	28	26	72.6686	41.3059	1.75928	132.748	52.1164
IGLV3-19	chr22	20	17	60.4513	34.3698	1.75885	47.8484	45.2077
Hs.662439	chr2	18	17	35.157	19.9911	1.75863	192.439	94.2769
Hs.556035	chr7	18	17	38.6417	21.9735	1.75856	61.0077	76.9323
Hs.599720	chr21	18	17	51.9128	29.5232	1.75837	63.2537	117.276
Hs.675123	chr2	18	17	132.299	75.2453	1.75824	87.6418	111.021
TRIM65	chr17	52	52	387.812	220.572	1.75821	232.297	294.435
ZNF582-AS1	chr19	18	17	63.7458	36.2622	1.75791	69.4501	71.5198
SLC2A10	chr20	28	26	38.7628	22.0505	1.75791	55.7427	58.5893
Hs.587350	chr9	18	17	48.873	27.8039	1.75778	80.2651	86.5109
Hs.664520	chr6	44	43	79.9218	45.4722	1.7576	124.885	90.8436
OR2L2	chr1	54	51	32.5891	18.5434	1.75745	75.9865	80.5489
Hs.550772	chrX	18	17	24.7767	14.0985	1.7574	83.1627	104.632
BCAR4	chr16	18	17	39.0979	22.2478	1.75739	72.9596	65.0421
OR5V1	chr6	38	34	37.9505	21.5959	1.7573	94.8628	67.3639
Hs.445342	chr4	18	17	51.0433	29.0497	1.7571	45.8446	86.0802
Hs.720000	chr15	18	17	48.9001	27.8347	1.7568	74.0959	71.2846
Hs.479989	chr1	18	17	51.5937	29.3726	1.75652	44.5945	77.1658
LINC00862	chr1	26	26	51.4949	29.3164	1.75652	94.1473	90.3517
FTHL17	chrX	18	17	29.9435	17.0506	1.75615	91.8773	71.0699
Hs.649591	chr9	18	17	26.4757	15.0772	1.75601	89.6792	83.6819
KIR3DX1	chr19	64	61	61.5753	35.067	1.75594	107.849	77.891
ITFG2	chr12	82	78	65.452	37.2748	1.75593	138.262	86.4723
Hs.635629	chr12	18	17	41.2468	23.4906	1.75589	64.845	95.7195
Hs.680127	chr15	18	17	31.1996	17.7751	1.75524	39.4448	117.735
CHAC2	chr2	18	17	29.3023	16.6962	1.75503	107.906	106.366
ETV7	chr6	46	43	138.494	78.9222	1.75482	205.086	151.231
PTPN14	chr1	74	68	59.6912	34.0261	1.75428	245.632	118.4
Hs.600017	chr2	18	17	103.316	58.9135	1.75369	213.341	99.0141
S100A7A	chr1	52	52	64.5576	36.8131	1.75366	185.047	65.2991
Hs.123307	chr2	18	17	27.4817	15.6711	1.75366	84.7004	163.603
Hs.734399	chr3	18	17	34.5077	19.6793	1.7535	67.2677	91.5499
Hs.436307	chr2	18	17	26.6765	15.2166	1.75311	109.084	119.683
Hs.608501	chr18	36	34	48.2679	27.5337	1.75305	100.345	83.6033
Hs.552820	chr1	26	26	30.028	17.1297	1.75299	65.1835	87.9799
ACSF2	chr17	28	26	56.8398	32.4263	1.75289	40.5245	76.2359
Hs.464224	chr17	18	17	24.6662	14.0782	1.75209	69.2283	95.8225
DAOA-AS1	chr13	18	17	46.8259	26.7265	1.75204	140.627	117.758
SPRY3	chrX	18	17	28.6461	16.3508	1.75197	64.3184	75.1671
LOC100507221	chr16	26	26	39.4011	22.4953	1.75153	113.067	94.933
Hs.669003	chr7	18	17	34.0113	19.423	1.75108	64.5683	66.8756
Hs.62772	chr4	18	17	29.7428	16.9858	1.75104	92.7857	77.815
Hs.655690	chr7	18	17	36.7505	20.9888	1.75096	77.6725	85.1963
Hs.560186	chr13	18	17	28.5904	16.3304	1.75075	88.2373	102.486
ACRC	chrX	18	17	47.172	26.9439	1.75075	66.2035	67.6393
Hs.735749	chr13	18	17	33.7219	19.2654	1.75039	72.0216	93.2582
Hs.657310	chr16	18	17	193.275	110.428	1.75023	106.092	97.7975
DEFB105B	chr8	18	17	109.696	62.7141	1.74915	114.017	141.781
PAX6	chr11	46	43	78.1819	44.6994	1.74906	84.7356	80.4124
Hs.658640	chr6	18	17	38.9696	22.285	1.74869	60.5933	79.6516
Hs.567421	chr15	28	25	44.518	25.459	1.74862	147.984	68.9871
Hs.665748	chr3	18	17	39.7908	22.7556	1.74862	93.6702	97.9942
ZBTB46	chr20	54	51	94.9512	54.3009	1.74861	132.936	111.534
FOLR1	chr11	56	52	742.972	424.968	1.7483	370.447	393.251
Hs.647536	chr14	18	17	30.36	17.3663	1.74822	87.0698	102.024
Hs.614284	chr10	28	25	63.5378	36.3485	1.74802	75.4732	90.2263
Hs.655762	chr17	28	26	56.73	32.4661	1.74736	144.832	74.7024
GPR174	chrX	18	17	35.4313	20.2844	1.74673	118.94	93.2414
Hs.660937	chr11	34	35	36.922	21.14	1.74655	101.115	96.8885
LOC100506014	chr2	18	17	39.55	22.6478	1.74631	111.199	80.5076
EPN2-AS1	chr17	18	17	52.5414	30.0884	1.74624	83.2407	65.4206
C11orf44	chr11	18	17	34.137	19.5492	1.74621	66.9435	72.1646
Hs.670767	chr9	18	17	36.5696	20.948	1.74573	84.3564	124.722
LOC100129112	chr17	18	17	27.2226	15.5943	1.74568	91.5003	104.825
Hs.667536	chr5	28	25	28.1243	16.1139	1.74534	131.142	94.6614
Hs.143316	chr3	18	17	166.997	95.6919	1.74515	180.628	191.488
ZNF830	chr17	36	34	86.0814	49.328	1.74508	139.975	100.402
Hs.670248	chr17	18	17	25.6902	14.7229	1.74491	89.4181	112.463
C14orf105	chr14	46	43	52.0469	29.8287	1.74486	119.238	72.6293
Hs.551827	chr1	18	17	49.7223	28.4972	1.74481	94.0097	85
Hs.385793	chr2	26	26	30.5171	17.4916	1.74467	66.4959	75.011
SLC22A31	chr16	18	17	54.206	31.0713	1.74457	90.445	57.5635
Hs.729540	chr20	18	17	45.4026	26.0305	1.7442	73.3714	66.8539
UHRF1BP1	chr6	36	34	61.0954	35.0327	1.74395	167.097	54.7836
SPDYA	chr2	18	17	41.017	23.5216	1.7438	99.1923	70.6184
MEX3B	chr15	18	17	33.0901	18.9763	1.74376	63.4401	70.1644
Hs.354110	chr4	18	17	85.7955	49.2031	1.7437	72.3465	84.2155
HSPA1A	chr6	48	43	2482.03	1423.43	1.7437	122.151	183.06
C14orf23	chr14	18	17	38.1813	21.9024	1.74325	68.1349	58.8771
Hs.744106	chr20	42	44	36.4752	20.9239	1.74323	74.1226	80.5757
TEAD3	chr6	28	26	45.7351	26.2424	1.7428	136.673	65.1774
REG3G	chr2	18	17	28.5067	16.3583	1.74265	54.2061	74.6672
Hs.26814	chr8	26	26	63.8173	36.6213	1.74263	104.793	58.2511
Hs.687674	chr12	18	17	63.0993	36.2205	1.74209	122.938	58.044
LINC00632	chrX	18	17	103.267	59.2909	1.7417	116.998	73.8944
Hs.672053	chr7	18	17	25.8155	14.8226	1.74163	74.2091	101.329
Hs.156918	chr10	18	17	37.1429	21.3271	1.74159	236.779	82.8539
LOC100506016	chr13	18	17	21.2999	12.234	1.74104	77.7768	79.4926
Hs.660128	chr6	18	17	30.6466	17.603	1.74099	67.829	124.536
Hs.656401	chr7	18	17	25.7951	14.8167	1.74095	169.721	107.22
LINC00645	chr14	18	17	45.578	26.1816	1.74084	94.1241	198.667
Hs.677406	chr1	26	26	1796.02	1031.82	1.74063	122.873	181.636
TPH1	chr11	18	17	45.6054	26.2032	1.74045	70.3756	76.2646
ANKRD28	chr3	82	77	255.404	146.751	1.74039	266.908	275.129
RALGPS2	chr1	98	95	63.0311	36.2209	1.74019	213.883	103.451
Hs.676482	chr10	18	17	33.1418	19.0457	1.74012	72.8481	97.5377
ZNF816	chr19	36	35	213.295	122.602	1.73974	182.252	218.692
Hs.289922	chr8	26	26	62.2885	35.804	1.73971	142.935	147.285
Hs.662177	chr19	26	26	38.2817	22.0097	1.73931	103.258	250.424
Hs.30483	chr17	26	26	24.6454	14.1701	1.73925	88.2381	108.712
Hs.710084	chr16	18	17	28.4433	16.3549	1.73913	67.262	78.764
Hs.694101	chr16	18	17	69.0914	39.7322	1.73892	95.7272	71.7003
Hs.661763	chr7	52	53	117.316	67.4711	1.73876	168.262	156.916
IL17D	chr13	18	17	157.268	90.4651	1.73843	143.964	109.277
FREM1	chr9	36	34	30.9573	17.8078	1.73841	75.8437	86.848
GNGT2	chr17	18	17	30.5779	17.5906	1.73831	92.509	93.3371
Hs.550659	chr16	18	17	32.5927	18.7623	1.73714	98.0243	103.73
CAPZA3	chr12	18	17	20.2875	11.679	1.73709	67.2733	121.448
Hs.533067	chr3	28	25	35.1533	20.2372	1.73707	69.5917	71.8272
SIX3	chr2	64	60	57.6204	33.1723	1.73701	113.488	80.3366
DNAAF3	chr19	18	17	28.0354	16.1405	1.73696	62.563	99.3641
Hs.352357	chr7	18	17	74.7442	43.0451	1.73641	161.998	116.002
C2CD3	chr11	36	34	36.5789	21.0675	1.73627	71.4411	81.8298
LOXL3	chr2	18	17	46.5648	26.8214	1.73611	68.2897	56.2841
ZNF346	chr5	54	51	77.9616	44.9233	1.73544	92.1181	79.8567
Hs.721160	chr1	18	17	42.0575	24.2416	1.73493	51.7215	68.3695
Hs.670167	chr17	18	17	42.7227	24.6264	1.73483	86.301	58.6383
EMR3	chr19	28	26	36.6595	21.1349	1.73455	65.2974	67.622
GUCA1C	chr3	54	51	36.66	21.1379	1.73433	97.3323	93.5495
Hs.656606	chr10	28	26	66.6082	38.4087	1.7342	69.4759	69.3457
MBOAT1	chr6	18	17	70.359	40.5772	1.73395	114.418	133.967
ATP6V1G3	chr1	18	17	45.7207	26.3774	1.73333	73.6897	82.4694
ZNF300	chr5	18	17	31.5306	18.1921	1.7332	64.6494	86.7197
CCDC150	chr2	54	51	63.864	36.8478	1.73318	146.902	191.699
OGG1	chr3	56	52	68.411	39.4713	1.73318	203.657	58.4898
Hs.231295	chr17	18	17	45.0595	26.0032	1.73285	52.6595	74.6006
C17orf99	chr17	18	17	122.495	70.7063	1.73245	127.939	91.5826
ANKAR	chr2	18	17	43.0023	24.8224	1.7324	76.7651	86.6984
Hs.126622	chr8	18	17	42.7203	24.6626	1.73219	157.218	88.9956
Hs.678314	chr21	18	17	71.1475	41.076	1.73209	78.9623	145.005
Hs.722382	chr12	18	17	38.349	22.1412	1.73202	59.6669	75.7304
Hs.668321	chr13	18	17	38.0603	21.9757	1.73193	45.3784	71.5445
Hs.595233	chr20	54	51	53.8689	31.1079	1.73168	148.94	71.4745
KIF23	chr15	46	43	42.7064	24.6624	1.73164	178.569	158.235
Hs.661385	chr3	18	17	31.3632	18.1144	1.73139	99.4137	94.8591
Hs.678315	chr10	18	17	39.2696	22.6821	1.7313	50.0991	80.0101
Hs.662627	chr4	18	17	35.2372	20.3573	1.73094	81.6525	107.004
EDN2	chr1	36	35	65.4555	37.8186	1.73077	72.5205	78.7527
GPNMB	chr7	46	43	107.764	62.2795	1.73032	145.91	103.864
Hs.666752	chrX	18	17	36.6747	21.204	1.72962	48.3797	82.0384
DIAPH3-AS1	chr13	54	51	43.2735	25.0238	1.72929	97.8673	123.47
Hs.663414	chr21	34	35	25.1725	14.5588	1.72902	76.7947	109.796
Hs.665965	chr12	18	17	35.5005	20.5346	1.72882	71.3173	74.7662
Hs.603847	chr1	18	17	35.4212	20.4903	1.72868	100.382	96.3975
Hs.527936	chr17	18	17	33.7689	19.5351	1.72863	86.9952	69.0719
Hs.595280	chr14	18	17	39.6725	22.9504	1.72862	73.9422	75.5721
GBA3	chr4	46	43	43.9606	25.4341	1.72841	83.2469	90.8915
Hs.675447	chr3	18	17	36.4081	21.0647	1.72839	56.8627	91.175
LINC00102	chrX	18	17	64.1565	37.1206	1.72833	110.51	142.055
Hs.657090	chrX	18	17	44.8558	25.9614	1.72779	86.9008	51.6102
Hs.663149	chr5	36	35	1507	872.319	1.72758	118.094	129.116
Hs.743642	chr9	18	17	37.7149	21.8343	1.72732	56.6445	78.2521
Hs.666584	chr7	18	17	34.6541	20.0688	1.72676	101.623	77.1073
Hs.104789	chr9	18	17	46.3031	26.8151	1.72675	72.2257	85.318
LOC100507311	chr15	18	17	29.7391	17.2237	1.72664	86.742	74.9395
Hs.659788	chr7	18	17	27.9726	16.2029	1.72639	113.775	84.7923
Hs.149726	chr1	28	25	45.1016	26.1255	1.72635	136.647	123.933
ARMC5	chr16	34	35	99.4051	57.5817	1.72633	151.357	70.9817
Hs.639360	chr5	18	17	45.7559	26.5084	1.72609	117.185	94.1849
Hs.601545	chr14	36	34	211.124	122.339	1.72573	120.019	98.1201
Hs.538421	chr10	18	17	58.5115	33.9064	1.72568	68.905	54.9498
HOXC10	chr12	28	26	77.1585	44.7258	1.72514	107.125	89.9388
Hs.678079	chr2	18	17	53.0152	30.7378	1.72476	56.5325	115.785
TAC1	chr7	28	26	731.131	423.913	1.72472	213.418	178.037
Hs.25345	chr6	18	17	16.9234	9.81369	1.72447	86.9147	134.654
Hs.657126	chr7	18	17	36.8545	21.3725	1.72439	178.501	78.9197
Hs.669773	chr4	18	17	28.5223	16.549	1.7235	95.5756	106.795
Hs.281931	chr3	18	17	32.8229	19.0448	1.72346	75.2583	75.6393
Hs.194980	chr14	18	17	23.3766	13.5649	1.72331	85.8942	94.3437
Hs.431753	chr1	36	34	33.9588	19.7062	1.72326	105.556	124.29
Hs.686516	chr10	18	17	29.045	16.8567	1.72305	80.037	90.2069
Hs.156725	chr2	18	17	31.5499	18.313	1.72281	71.4845	87.7607
LOC100507535	chr19	18	17	48.4627	28.1303	1.72279	108.975	93.6939
Hs.683970	chr6	44	43	49.1757	28.5492	1.72249	72.7778	104.615
ANKRD30B	chr18	52	52	80.6667	46.8387	1.72223	162.444	162.051
Hs.664605	chr11	18	17	26.4297	15.3465	1.7222	85.6798	89.1117
ZNF283	chr19	26	26	23.4125	13.5979	1.72177	114.182	104.265
Hs.632500	chr1	18	17	32.1161	18.6534	1.72173	84.689	89.6442
FAM160A1	chr4	36	34	40.5152	23.5377	1.72129	151.295	124.213
Hs.614313	chr19	18	17	60.8301	35.3429	1.72114	99.7955	66.2414
Hs.734093	chr3	18	17	43.2052	25.1076	1.7208	116.907	88.9257
Hs.564504	chr12	18	17	37.7177	21.9272	1.72014	111.737	84.9022
Hs.613664	chr9	18	17	51.3652	29.8619	1.72009	82.1958	71.6323
SAPCD2	chr9	26	26	41.3218	24.0236	1.72005	80.9578	89.3392
LRRC4B	chr19	18	17	18.7557	10.9051	1.71991	83.8362	99.0275
MAGEA3	chrX	28	26	47.3505	27.5395	1.71937	90.2174	43.7808
C19orf33	chr19	34	35	28.7433	16.722	1.71889	105.218	95.0612
Hs.196134	chrX	18	17	47.8652	27.8474	1.71884	121.2	49.837
SH2D6	chr2	18	17	36.2405	21.0907	1.71832	43.0431	71.0776
MUC13	chr3	46	43	54.1846	31.5377	1.71809	77.2874	68.6024
FIP1L1	chr4	46	43	117.651	68.4931	1.71771	264.995	142.291
Hs.663137	chr7	18	17	53.7503	31.294	1.71759	77.4558	64.0884
MYLK-AS1	chr3	18	17	46.3949	27.0152	1.71736	62.3288	77.4172
Hs.664102	chr20	18	17	39.9411	23.2995	1.71425	62.2867	66.9673
ZNF490	chr19	18	17	668.177	389.785	1.71422	110.618	150.852
SRCRB4D	chr7	18	17	47.9366	27.9675	1.71401	126.452	67.8696
VPS37D	chr7	18	17	49.8102	29.0609	1.71399	73.8144	74.0923
NPVF	chr7	28	26	32.9769	19.2425	1.71375	105.771	72.4319
Hs.655960	chr6	18	17	36.8618	21.5119	1.71356	37.0856	86.676
C21orf91-OT1	chr21	36	34	53.7983	31.3964	1.71352	205.086	72.4453
Hs.656155	chr7	18	17	85.1095	49.6769	1.71326	60.2309	90.7753
Hs.658786	chr2	18	17	49.2668	28.7563	1.71325	128.571	74.8498
Hs.662110	chr18	18	17	118.934	69.4328	1.71293	132.987	87.16
Hs.434335	chr18	18	17	27.489	16.0489	1.71283	66.2886	104.153
NLRC4	chr2	54	51	37.1798	21.7089	1.71265	88.0876	76.6309
Hs.571699	chrX	18	17	47.7752	27.9008	1.71232	67.9855	75.0466
SETBP1	chr18	46	43	86.298	50.3992	1.71229	179.398	80.165
LOC149134	chr1	18	17	53.1339	31.031	1.71228	53.5337	87.9296
Hs.662069	chr7	18	17	62.3211	36.4213	1.71112	76.1713	77.8232
Hs.660169	chr22	18	17	33.4076	19.5256	1.71097	55.4501	97.401
Hs.735347	chr13	18	17	28.1797	16.4728	1.71068	83.4298	90.4245
Hs.660456	chr16	18	17	33.7224	19.7186	1.71018	133.894	85.2158
Hs.32769	chr15	28	26	39.0999	22.8775	1.7091	83.0574	79.2004
Hs.659063	chr3	18	17	75.6207	44.2468	1.70907	106.43	86.6348
Hs.119922	chr12	18	17	34.5278	20.203	1.70904	52.3843	87.5519
Hs.241416	chr12	18	17	59.6606	34.9149	1.70874	78.9593	58.3983
Hs.724034	chr7	18	17	43.4339	25.4197	1.70867	47.3295	60.7679
Hs.657821	chr19	18	17	51.8495	30.3483	1.70848	68.7538	98.1299
Hs.128668	chr8	18	17	32.3867	18.9577	1.70837	60.0585	66.3947
Hs.440981	chr12	18	17	25.242	14.7761	1.7083	96.9143	90.0533
ANXA2R	chr5	18	17	34.3299	20.0986	1.70808	65.2029	75.666
ACR	chr22	28	26	83.9385	49.1455	1.70796	187.832	93.8941
Hs.211033	chr12	18	17	40.8937	23.9484	1.70758	68.3248	77.717
Hs.550129	chr8	34	35	41.4089	24.2503	1.70756	103.168	75.4714
Hs.740635	chr5	18	17	28.0147	16.4122	1.70695	74.4755	83.4806
ZNF285	chr19	18	17	104.747	61.3699	1.70681	125.435	51.0421
RFPL3	chr22	28	26	73.3692	42.9975	1.70636	75.6845	79.1571
HOXB7	chr17	92	87	53.7372	31.4933	1.70631	161.333	79.5634
Hs.661045	chr13	18	17	38.4658	22.5546	1.70545	67.4002	63.1692
HOXB3	chr17	46	43	51.5139	30.2112	1.70513	139.035	78.3328
MED1	chr17	92	86	87.0689	51.0648	1.70507	272.253	81.5298
Hs.608775	chr14	36	34	33.8347	19.8437	1.70506	81.384	99.078
Hs.677105	chr3	18	17	43.2867	25.391	1.7048	37.4509	70.4462
Hs.591597	chr2	18	17	37.0065	21.7078	1.70476	68.6465	105.347
Hs.350698	chr2	26	26	42.6293	25.0183	1.70392	55.9822	67.5018
Hs.661577	chr22	18	17	35.8034	21.0131	1.70386	96.9232	76.7837
PBX4	chr19	18	17	76.0878	44.659	1.70375	57.8251	48.7681
VAV1	chr19	28	26	54.7833	32.1592	1.7035	97.797	62.3777
SLC13A1	chr7	64	61	40.011	23.4891	1.70339	226.409	81.6322
Hs.71947	chr6	18	17	41.1858	24.1868	1.70282	61.3845	73.9232
BFSP2-AS1	chr3	28	25	38.8712	22.8295	1.70267	82.664	113.416
PDGFRL	chr8	28	26	42.0368	24.6907	1.70254	50.1706	75.2333
Hs.348792	chr5	18	17	31.132	18.2903	1.7021	47.2489	106.83
PLAC8	chr4	28	26	47.0923	27.6852	1.70099	90.0069	65.1338
SLC9B1	chr4	46	42	91.2329	53.6356	1.70098	159.588	176.505
Hs.434347	chr1	18	17	37.5334	22.0689	1.70073	90.0523	79.5285
Hs.677268	chrX	28	26	563.831	331.713	1.69976	101.273	99.5024
ZSCAN20	chr1	46	42	43.4784	25.5796	1.69973	82.5717	67.2281
CCDC42	chr17	18	17	24.9536	14.6827	1.69952	97.9729	85.7433
CRISP3	chr6	28	26	32.1863	18.939	1.69948	86.9567	87.4996
Hs.664883	chr2	18	17	39.882	23.4691	1.69934	64.1227	84.2212
Hs.154655	chr13	18	17	40.2756	23.7062	1.69895	66.4664	102.255
Hs.707733	chr11	28	26	59.6317	35.0994	1.69894	160.253	146
CGA	chr6	46	43	49.4957	29.1334	1.69894	55.2732	99.819
CLEC4F	chr2	18	17	49.0268	28.8591	1.69883	56.8751	81.7264
C7orf61	chr7	18	17	43.4589	25.5837	1.69869	80.5904	71.214
Hs.661131	chr2	18	17	110.741	65.1966	1.69857	82.8267	79.3292
Hs.720329	chr5	18	17	53.9206	31.7452	1.69854	148.375	43.5338
S100A8	chr1	64	61	87.6105	51.5844	1.69839	238.47	236.207
Hs.743502	chr7	18	17	122.551	72.1643	1.69823	93.7902	130.313
Hs.661374	chr5	18	17	42.9428	25.292	1.69788	52.9347	87.2333
Hs.731620	chr16	18	17	163.541	96.3218	1.69786	94.8685	39.9138
CELF2-AS1	chr10	18	17	25.0552	14.7587	1.69766	74.9591	73.7059
OTOGL	chr12	18	17	33.2061	19.5635	1.69734	152.795	75.6408
Hs.648905	chr3	18	17	56.4774	33.2741	1.69734	74.3022	104.236
Hs.673552	chr14	18	17	157.924	93.0523	1.69716	118.11	159.958
DTNA	chr18	188	172	135.993	80.1521	1.69669	220.856	151.234
Hs.591058	chr18	18	17	33.6341	19.8282	1.69628	85.294	84.8417
ST7-OT4	chr7	18	17	31.4481	18.541	1.69614	91.8325	98.8193
MORC2	chr22	48	43	116.102	68.4531	1.69608	127.281	128.226
Hs.655766	chr16	18	17	38.2146	22.5327	1.69596	57.6951	82.8234
LOXHD1	chr18	18	17	25.2746	14.9062	1.69557	77.4388	79.6931
Hs.595054	chr12	18	17	46.4498	27.396	1.6955	85.3879	77.3797
ESRP1	chr8	46	43	47.4801	28.0049	1.69542	106.74	86.1809
SLC29A4	chr7	18	17	42.5513	25.0993	1.69532	55.3123	106.134
Hs.667735	chr3	18	17	99.045	58.435	1.69496	97.3823	115.678
ARX	chrX	36	34	64.9843	38.3418	1.69487	125.627	101.415
Hs.547548	chr2	18	17	34.9394	20.616	1.69477	111.07	89.6774
Hs.655522	chr1	18	17	105.387	62.1888	1.69463	118.447	90.4755
Hs.673278	chr6	26	26	36.3466	21.4511	1.69439	116.691	81.8655
LOC100505942	chr16	18	17	32.5826	19.2309	1.69428	93.308	79.1392
Hs.551042	chr4	36	34	44.1476	26.0594	1.69411	171.7	95.8027
FRY-AS1	chr13	34	35	38.9045	22.9692	1.69377	132.102	69.5319
Hs.568230	chr1	18	17	40.3123	23.8032	1.69357	122.224	93.4422
ACSS2	chr20	18	17	95.3782	56.3199	1.69351	173.688	48.636
FDXACB1	chr11	18	17	31.902	18.8408	1.69324	68.6616	84.1851
Hs.373571	chr19	18	17	33.6417	19.8685	1.69322	142.266	61.1864
SPATA32	chr17	28	25	37.8007	22.3324	1.69264	54.3398	85.9005
Hs.663667	chr8	18	17	65.7459	38.8422	1.69264	79.7662	109.192
Hs.660152	chr19	18	17	37.6087	22.222	1.69241	59.2733	69.2624
Hs.735593	chr16	18	17	27.8411	16.4514	1.69233	80.7206	77.4371
FBXW12	chr3	62	61	1521.94	899.333	1.69229	234.162	174.809
Hs.733979	chr14	18	17	67.3849	39.8199	1.69224	188.364	80.7324
Hs.656223	chr12	18	17	63.7871	37.6965	1.69212	84.0066	134.169
RBMY1A1	chrY	56	52	140.98	83.3196	1.69204	185.24	143.894
Hs.678735	chr15	26	26	34.5431	20.4156	1.69199	135.202	75.0043
Hs.659243	chr12	18	17	55.6391	32.8853	1.69191	65.6746	86.749
SLC25A16	chr10	84	78	417.194	246.625	1.69161	218.068	262.426
TMED6	chr16	18	17	31.555	18.655	1.69151	171.847	90.2944
Hs.599235	chr8	18	17	33.6695	19.9119	1.69092	126.827	64.3747
DCAF4L1	chr4	18	17	72.3558	42.7917	1.69088	121.955	101.227
COL24A1	chr1	34	35	51.7678	30.617	1.69082	68.0501	99.0212
BAG3	chr10	28	26	187.862	111.115	1.69071	98.465	73.1688
Hs.636845	chr17	56	52	38.5731	22.8157	1.69064	66.1164	74.1452
GDAP2	chr1	46	43	61.4919	36.3762	1.69044	159.592	66.59
Hs.113689	chr3	18	17	51.2126	30.311	1.68957	105.789	66.8916
LOC100507562	chr2	18	17	42.7731	25.3186	1.6894	61.248	80.0203
TBX5	chr12	92	86	72.4666	42.8968	1.68933	199.331	185.506
Hs.668009	chr2	18	17	32.8382	19.4458	1.6887	147.891	64.7752
MYCNOS	chr2	56	52	59.5123	35.2438	1.68859	100.769	80.4596
IFLTD1	chr12	18	17	27.214	16.1165	1.68858	87.0597	70.7985
PBOV1	chr6	38	34	40.2861	23.8595	1.68847	65.8525	57.1209
Hs.594872	chr3	28	26	52.1406	30.8929	1.68779	67.9799	87.8869
Hs.507924	chr4	36	34	53.5683	31.7431	1.68756	171.506	123.545
STIP1	chr11	56	52	121.565	72.0501	1.68723	155.104	140.532
Hs.147481	chr10	18	17	28.093	16.6549	1.68678	75.3977	96.2533
Hs.732775	chr3	18	17	34.6685	20.5538	1.68672	27.7146	99.136
Hs.733102	chr3	18	17	67.8214	40.2106	1.68666	57.4963	64.4126
Hs.656220	chr2	18	17	56.5811	33.5519	1.68638	68.1514	111.74
Hs.661793	chr13	28	26	305.519	181.185	1.68623	125.354	160.38
CT62	chr15	28	26	37.7591	22.3943	1.68611	105.999	74.3598
Hs.658050	chr15	18	17	51.3797	30.4751	1.68596	60.5355	58.9916
CRIP3	chr6	18	17	47.279	28.0431	1.68594	105.961	77.5837
RECK	chr9	136	130	376.772	223.48	1.68593	294.449	312.218
Hs.733291	chr6	18	17	49.905	29.6014	1.6859	96.3268	70.241
Hs.201488	chr6	18	17	44.6042	26.4686	1.68517	75.2634	69.0263
Hs.657706	chr12	18	17	39.7525	23.5916	1.68503	86.55	97.7374
SERP2	chr13	66	58	50.3121	29.8643	1.68469	89.0106	171.361
PRKD2	chr19	82	78	60.462	35.8966	1.68434	163.127	71.0687
GGACT	chr13	44	43	46.4028	27.5501	1.68431	89.4412	71.0677
Hs.594758	chr17	18	17	63.4882	37.7023	1.68394	89.915	121.302
Hs.458593	chr15	18	17	38.7739	23.0276	1.6838	51.6168	66.6758
Hs.657303	chr7	18	17	71.7143	42.593	1.68371	86.6381	53.9544
MAGEB18	chrX	18	17	28.0079	16.6372	1.68345	63.1588	125.963
MRPL28	chr16	28	26	575.343	341.767	1.68344	154.713	114.348
Hs.667217	chr16	18	17	50.2731	29.8699	1.68307	61.751	87.9185
LEP	chr7	36	35	58.4223	34.7126	1.68303	144.752	187.784
Hs.675375	chr8	34	35	48.619	28.8972	1.68248	67.3005	96.8747
Hs.636222	chrX	28	25	28.3783	16.8676	1.68241	65.2111	83.7986
TPM4	chr19	74	69	130.594	77.6258	1.68235	220.378	162.115
DLEU7-AS1	chr13	18	17	38.6118	22.9513	1.68234	86.6149	89.8604
Hs.607645	chr14	18	17	57.1289	33.9635	1.68207	46.4568	74.3379
Hs.672149	chr1	18	17	43.3652	25.7827	1.68195	72.7848	81.9874
TXNDC8	chr9	18	17	39.1915	23.3028	1.68184	65.6492	80.3841
Hs.635341	chr19	18	17	57.1836	34.0008	1.68183	125.61	111.287
Hs.666530	chr10	18	17	70.4042	41.8733	1.68136	106.541	89.9708
FCRL1	chr1	18	17	38.6567	22.992	1.68131	46.5212	109.898
ARPP21	chr3	134	129	57.2266	34.0483	1.68075	230.678	104.957
CTAGE1	chr18	28	26	34.3692	20.4516	1.68051	82.0532	88.2374
CCDC81	chr11	28	26	35.3306	21.0249	1.68042	154.267	73.2057
C9orf43	chr9	18	17	33.9992	20.2347	1.68024	77.5486	87.1145
SPRR2D	chr1	28	26	62.9331	37.4621	1.67991	128.197	59.496
Hs.658294	chr6	18	17	42.0873	25.0568	1.67968	85.6534	77.7182
AP5B1	chr11	26	26	41.0955	24.4689	1.6795	82.7579	85.1905
Hs.696622	chr12	18	17	45.3877	27.035	1.67885	66.3547	75.3972
LOC100128398	chr19	28	25	40.0608	23.863	1.67878	90.736	83.5826
Hs.607831	chr16	18	17	43.5042	25.9181	1.67853	47.1924	74.0937
Hs.573373	chr7	36	34	38.9912	23.2349	1.67813	91.9469	66.6696
Hs.665272	chr2	18	17	62.1134	37.0142	1.6781	157.833	48.1854
Hs.660003	chr1	18	17	50.6102	30.1613	1.67798	66.7021	92.3567
F3	chr1	28	26	213.684	127.354	1.67787	138.652	148.772
Hs.656402	chr10	18	17	33.1982	19.788	1.67769	65.7375	79.4713
CLDN6	chr16	46	43	220.773	131.599	1.67762	182.048	165.528
FAM46A	chr6	64	60	70.2772	41.8917	1.67759	102.246	101.405
Hs.665466	chr3	18	17	39.0202	23.2661	1.67713	90.7506	114.721
CCDC84	chr11	18	17	257.151	153.331	1.6771	168.732	56.558
Hs.734052	chr12	34	35	41.7008	24.8691	1.67681	80.2736	112.19
Hs.649237	chr16	18	17	45.6049	27.201	1.67659	83.5867	81.155
Hs.662536	chr3	18	17	31.4422	18.756	1.67638	105.593	123.489
Hs.317080	chr17	18	17	38.9876	23.2584	1.67628	96.0224	60.7998
Hs.434595	chr4	18	17	44.9658	26.8255	1.67624	65.1558	111.839
Hs.130980	chr1	18	17	45.4082	27.0894	1.67623	91.811	108.147
LOC100506558	chr8	18	17	34.7925	20.7657	1.67548	83.214	84.6204
Hs.635285	chr19	18	17	39.0546	23.3097	1.67547	86.9659	65.6045
LOC100506236	chr7	18	17	21.7397	12.9754	1.67545	85.8121	110.695
CDC5L	chr6	104	95	330.654	197.378	1.67523	291.333	308.627
Hs.635058	chr15	18	17	65.3748	39.0262	1.67515	60.7096	69.7691
Hs.382105	chr17	18	17	40.8155	24.3657	1.67512	102.924	95.3725
SLC25A2	chr5	18	17	34.2701	20.4616	1.67485	165.413	141.018
Hs.658195	chr11	18	17	39.9323	23.8437	1.67475	70.7026	96.0306
ZNF778	chr16	38	34	79.44	47.448	1.67425	159.926	87.8302
BARX1	chr9	28	26	47.2936	28.2481	1.67422	72.9466	86.042
Hs.564144	chr10	26	26	29.6138	17.6905	1.674	189.66	119.604
Hs.677061	chr7	18	17	45.802	27.3637	1.67382	75.7828	61.8893
Hs.13742	chr1	18	17	63.6125	38.0093	1.6736	99.7476	77.5935
FAM99B	chr11	18	17	38.4947	23.0023	1.67351	79.1314	96.9133
Hs.639358	chr3	44	43	49.2227	29.4159	1.67334	111.063	84.8301
Hs.514564	chr17	18	17	40.675	24.314	1.6729	170.302	67.1135
Hs.270711	chr18	18	17	34.2601	20.488	1.6722	97.9999	98.6389
DCLK3	chr3	18	17	42.7641	25.5747	1.67212	88.0649	66.9034
LATS2	chr13	54	51	95.0895	56.8723	1.67198	199.464	133.601
Hs.525445	chr14	18	17	35.2357	21.0748	1.67194	163.345	85.622
Hs.658730	chr8	18	17	31.071	18.584	1.67192	96.2297	104.705
Hs.149190	chr15	18	17	42.2955	25.3007	1.67172	82.8114	83.8552
LOC729866	chr1	18	17	28.4661	17.0291	1.67162	86.118	87.8398
GFAP	chr17	74	69	396.889	237.445	1.6715	225.178	214.007
Hs.694188	chr10	34	35	27.8461	16.6602	1.67141	70.5575	133.049
Hs.662858	chr2	18	17	63.8646	38.2129	1.67128	200.206	89.7143
OR6A2	chr11	28	26	40.7123	24.3619	1.67114	50.983	73.476
Hs.657736	chr10	18	17	101.912	60.9911	1.67094	98.084	147.577
Hs.269837	chr11	8	9	31.147	18.6444	1.67058	80.3	71.872
KIAA1841	chr2	18	17	25.7613	15.4251	1.67009	85.5179	116.491
Hs.673096	chr5	18	17	70.2731	42.0819	1.66991	114.86	100.536
Hs.734791	chr17	18	17	25.2211	15.1048	1.66974	124.914	85.8742
Hs.677267	chr1	72	70	46.5496	27.8784	1.66974	92.1664	79.9162
NBEAL2	chr3	46	43	46.4029	27.7921	1.66964	62.8139	66.7189
Hs.639369	chr1	18	17	67.884	40.6583	1.66962	80.8173	112.355
Hs.601877	chr6	36	34	44.8607	26.8718	1.66943	62.8498	108.569
TNFRSF13C	chr22	18	17	26.6126	15.9416	1.66938	63.7437	82.625
ZNF563	chr19	18	17	41.2234	24.694	1.66937	80.9316	85.28
KCNH5	chr14	54	51	52.8767	31.6799	1.66909	114.279	107.732
GCSAM	chr3	18	17	24.9513	14.9493	1.66906	84.7624	102.215
FLJ23867	chr1	26	26	41.3406	24.7712	1.6689	82.1128	85.1946
UPP2	chr2	36	34	33.9805	20.3649	1.66858	67.9927	72.0998
Hs.559708	chr1	18	17	27.3335	16.382	1.66851	90.5598	112.908
TRAJ17	chr14	10	8	34.9543	20.9503	1.66843	72.807	67.7941
ZSCAN16	chr6	28	26	84.8	50.8369	1.66808	181.839	51.1707
Hs.662309	chr5	46	42	27.3563	16.4009	1.66798	92.2766	98.6296
TINAG	chr6	62	60	28.9577	17.3628	1.6678	91.8621	117.995
Hs.662681	chr17	28	25	47.851	28.6913	1.66779	85.0037	63.1939
Hs.649193	chr6	18	17	42.6443	25.575	1.66742	74.3124	75.2336
Hs.180761	chr4	18	17	40.6291	24.3673	1.66736	88.9203	89.2852
DAZ2	chrY	68	60	44.7533	26.8432	1.66721	107.727	56.4009
Hs.613914	chr3	36	34	44.6673	26.795	1.667	99.6266	69.6455
PPP1R27	chr17	18	17	91.9319	55.1562	1.66675	143.537	82.884
Hs.666269	chr18	18	17	35.4551	21.278	1.66628	144.475	98.721
TEKT1	chr17	18	17	22.3963	13.4417	1.66618	79.4331	117.167
ERC2-IT1	chr3	28	26	128.173	76.9296	1.66611	183.039	210.64
Hs.585699	chr15	18	17	51.2275	30.7487	1.666	88.7819	53.5136
GNRH1	chr8	46	43	33.1554	19.9039	1.66578	64.9277	73.8423
CDC45	chr22	28	26	50.0493	30.0464	1.66573	61.9526	98.5151
Hs.382124	chr9	18	17	39.428	23.6739	1.66547	87.945	74.4988
FBLL1	chr5	34	35	63.2271	37.9636	1.66546	159.137	94.2297
Hs.190988	chr11	18	17	50.2846	30.1956	1.6653	158.08	157.381
Hs.516951	chr20	18	17	25.1877	15.1253	1.66527	62.4372	90.8237
SPG20OS	chr13	18	17	46.3645	27.8425	1.66524	60.6214	73.0229
ACTRT2	chr1	18	17	31.5779	18.9663	1.66495	46.6409	63.6736
Hs.597735	chr12	72	70	72.9032	43.7898	1.66484	165.649	75.1866
WBP2NL	chr22	18	17	28.3001	16.9988	1.66483	64.0619	89.6969
LOC100130468	chr18	18	17	43.5032	26.1311	1.66481	73.903	68.9832
Hs.658599	chr10	34	35	28.2577	16.978	1.66437	124.274	81.8072
FAM26E	chr6	18	17	37.536	22.5585	1.66394	98.7154	82.8811
KCNK6	chr19	34	35	37.1214	22.3095	1.66393	66.3644	85.7707
APOBEC3F	chr22	66	60	50.9345	30.6162	1.66364	177.81	115.344
Hs.559248	chr17	18	17	73.4572	44.1561	1.66358	115.914	114.425
ZNF136	chr19	28	26	85.964	51.675	1.66355	147.18	64.5522
Hs.731790	chr11	18	17	45.9414	27.621	1.66328	74.0915	81.3383
Hs.734567	chr12	18	17	21.7149	13.0586	1.66289	103.326	116.631
Hs.729282	chr14	28	25	24.4228	14.6904	1.6625	74.607	91.4556
Hs.680458	chr11	18	17	36.66	22.0543	1.66227	57.7319	66.5756
Hs.126521	chr20	18	17	38.1777	22.9678	1.66223	157.025	91.1138
Hs.729668	chr17	26	26	35.9286	21.6167	1.66207	73.4051	95.9966
RNF148	chr7	18	17	33.0124	19.8676	1.66162	86.361	78.182
FAM20A	chr17	54	51	52.7715	31.7593	1.66161	115.241	106.2
Hs.703146	chr6	28	26	77.251	46.4926	1.66158	93.5971	75.7812
ASB14	chr3	36	34	62.263	37.477	1.66137	90.2066	79.946
Hs.509554	chr14	18	17	64.3457	38.7335	1.66124	106.939	95.3293
FAM104B	chrX	44	43	73.793	44.4205	1.66124	154.287	111.368
APCS	chr1	28	26	44.8539	27.0102	1.66063	114.528	74.2414
Hs.660170	chr14	18	17	23.3679	14.0723	1.66056	94.5993	93.5386
TADA1	chr1	18	17	42.8955	25.8395	1.66008	94.8854	178.579
Hs.658131	chr19	52	52	46.9939	28.309	1.66003	110.731	216.496
C6orf132	chr6	36	34	33.5578	20.2212	1.65954	126.28	89.1318
Hs.669778	chr20	18	17	37.8354	22.8019	1.65931	84.3351	83.9161
Hs.434529	chr9	28	25	29.7715	17.9437	1.65916	73.4323	95.431
Hs.648885	chr7	18	17	31.1596	18.7859	1.65867	56.1285	94.8329
SERPINB12	chr18	18	17	24.9163	15.0224	1.65861	125.673	99.4719
C5AR1	chr19	28	26	42.0657	25.3714	1.658	109.99	86.4095
Hs.657012	chr10	18	17	43.601	26.2993	1.65788	50.2659	69.6442
MGC13053	chr11	28	26	62.398	37.6376	1.65786	156.26	176.271
Hs.657005	chr2	26	26	32.2866	19.4788	1.65752	87.6706	96.8362
Hs.731870	chr17	18	17	42.9003	25.8841	1.6574	91.7166	90.4596
[truncated: 23,797 more rows]
